# Supplementary material for: Towards Bioprospection of Commercial Materials of Mentha spicata L. Using a Combined Strategy of Metabolomics and Biological Activity Analyses
Source: MDPI journal article supplement (doi:10.3390/molecules27113559), 2022-05-31
Supplement: s1 [file s1]

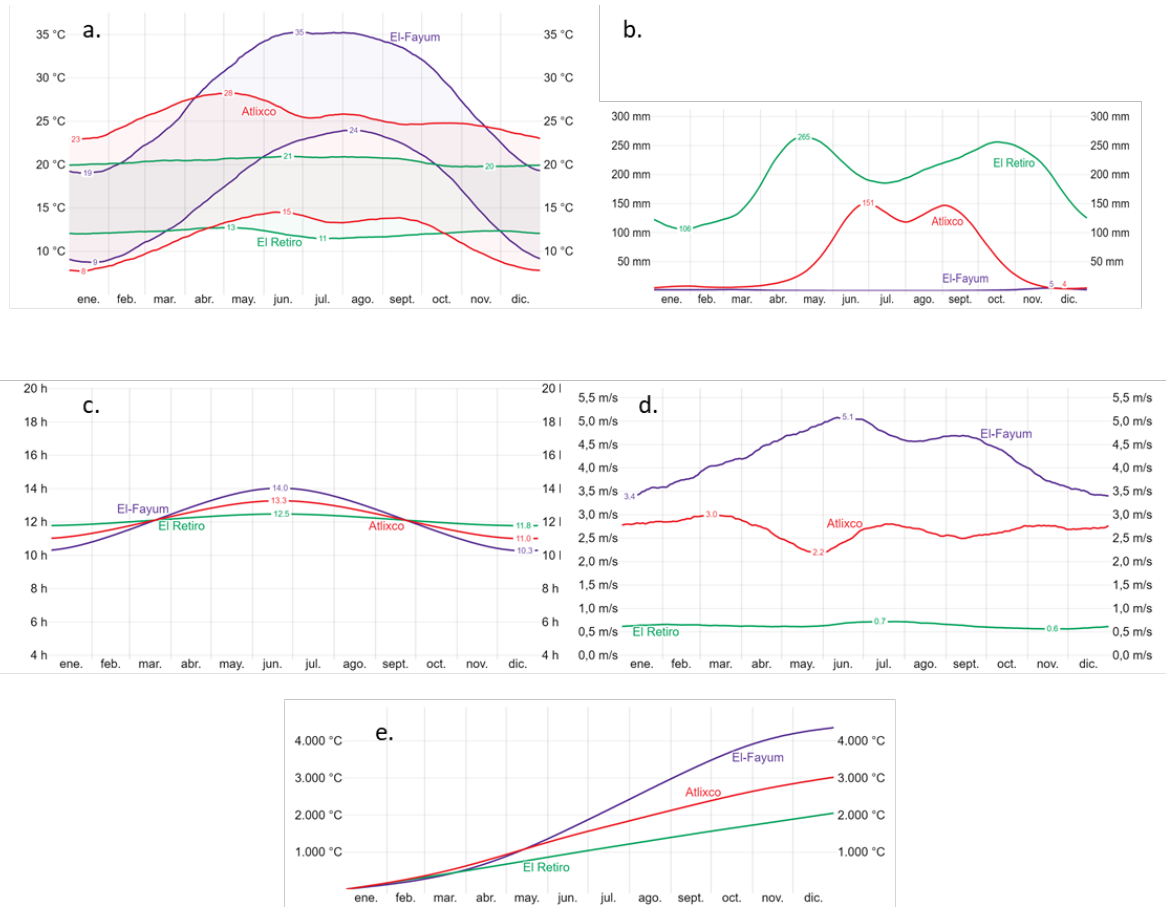

**Figure S1.** Average monthly climatic conditions of the cultivation areas of the commercial products of *Mentha spicata* L. evaluated. a. Average maximum and minimum temperature; b. Average monthly rain precipitation; c. Average daylight hours; d. Average monthly wind speed; and e. Cumulative average growing degree days are defined as the thermal integral with a base temperature of 10 °C.

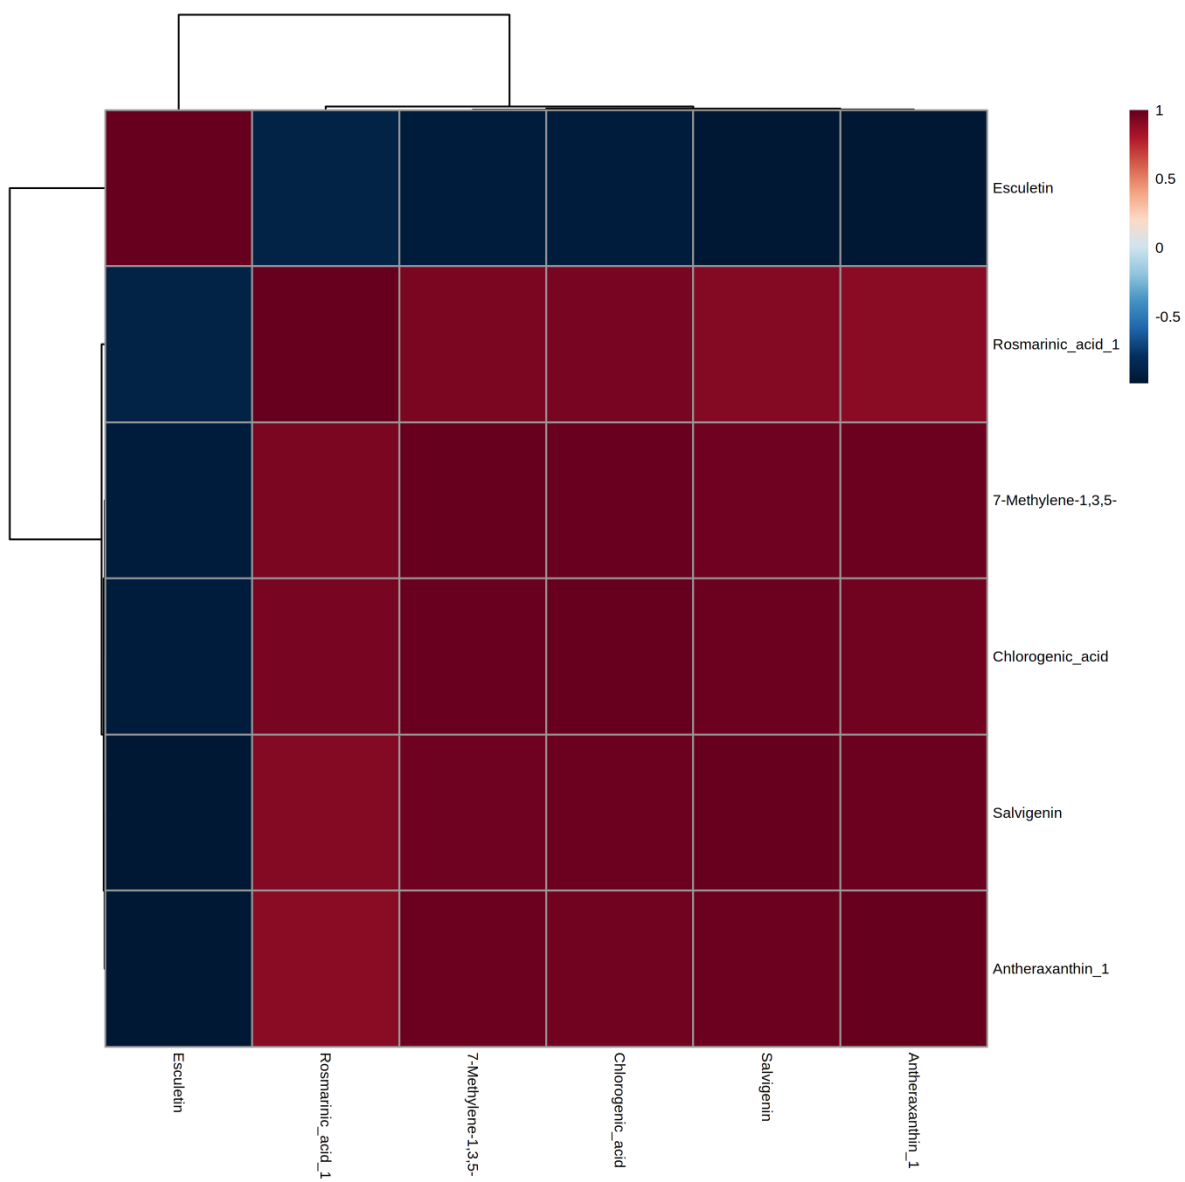

**Figure 2.** Pearson correlation analysis of the top 6 discriminant metabolites in commercial *Mentha spicata* samples.
