# Supplementary material for: Towards Bioprospection of Commercial Materials of Mentha spicata L. Using a Combined Strategy of Metabolomics and Biological Activity Analyses
Source: Molecules. 2022 May 31;27(11):3559. doi: 10.3390/molecules27113559 (PMC9182276; doi:10.3390/molecules27113559)
Supplement: Supplementary file 1 [file molecules-27-03559-s001.zip › Supplementary tables rev.xlsx]

## Sheet: Supplementary Table S1
Table S1. List of metabolites automatically annotated via HPLC/MS database
Aligment ID	Average Rt(min)	Average Mz	Metabolite name	Adduct type	20211221_097_B_01_MA_LOTE_SMD26F2168	20211221_097_B_02_FC_LOTE_277016	20211221_097_B_03_AC_LOTE_HM	20211221_097_B_04_PULL_01	20211221_097_B_04_PULL_02	20211221_097_B_04_PULL_03	20211221_097_B_05_AB_LOTE_HM	20211221_097_B_06_FA_LOTE_277016	20211221_097_B_07_MB_LOTE_SMD26F2168	20211221_097_B_08_AA_LOTE_HM	20211221_097_B_09_MC_LOTE_SMD26F2168	20211221_097_B_10_FB_LOTE_277016
9	23.309	101.069	w/o MS2:Gyromitrin	[M+H]+	241500	571629	91752	161448	449520	878731	522007	551937	455821	435360	403269	481813
11	4.654	102.089	w/o MS2:valeramide	[M+H]+	111743	86050	88314	2262.93	32434	66555	76974	150476	73601	22629	68253	53894
112	1.674	109.027	w/o MS2:p-Benzoquinone	[M+Na]+	114.497	1149	57925	9202	48876	36977	94112	1147	1196	96601	1145	114.497
150	8.841	113.069	w/o MS2:1,4-Cyclohexanedione	[M+H]+	986.78	986.78	25141	986.78	986.78	986.78	14019	986.78	986.78	9868	986.78	986.78
158	12.096	115.052	w/o MS2:Diallyl Sulfide	[M+H]+	44641	35295	611.124	6111	30385	8971	611.124	21413	39831	611.124	39081	22919
209	1.676	119.084	Unknown/7-Methylene-1,3,5-cyclooctatriene	[M+CH3OH+H]+	14519	8177	100065	7990	9318	27393	89958	7700	7168	86024	13347	5778
210	13.149	120.08	w/o MS2:CYCLOSERINE	[M+H]+	37213	18225	22764	26367	1946	60844	22558	50189	41707	26959	75709	24336
288	0.746	126.971	w/o MS2:4-Hydroxy-6-Methylpyran-2-One	[M+H]+	23558	29335	2213.4	2213.4	22134	23235	2213.4	28922	34462	2213.4	31130	22427
290	1.68	127.038	w/o MS2:4-Hydroxy-6-Methylpyran-2-One	[M+Na]+	10985	8901	243854	21001	76084	68029	161359	6974	22747	241701	18824	12731
331	10.149	131.084	w/o MS2:Creatinine	[M+H]+	24628	95408	3723	4500	69226	26562	2371	109301	85794	3788	81127	106771
332	1.089	132.101	w/o MS2:Diallyl Sulfide	[M+H]+	21786	108344	781827	343751	85842	60676	628530	36789	79703	121755	85689	58684
336	20.989	133.099	w/o MS2:Ornithine	[M+H]+	15577	30667	48497	39069	26646	114852	43505	23100	11390	87963	12400	27013
369	2.666	135.043	Unknown//1-Isobenzofuranone	[M+CH3OH+H]+	239962	188362	39010	126007	155550	131491	24134	245164	216025	22527	194447	58047
370	21.925	135.079	w/o MS2:1-indanol	[M+CH3OH+H]+	29816	53625	36895	31125	86052	92001	283442	24819	29374	142877	31988	42453
414	0.913	136.061	w/o MS2:ADENINE	[M+H]+	9503	9986	22103	8680	14501	15385	57787	11259	11913	16155	6710	14034
419	7.252	137.059	w/o MS2:Bovinocidin (3-Nitropropionic Acid)	[M+H]+	36621	23038	129.989	1300	23101	9641	129.989	10883	29430	129.989	41803	14653
426	6.126	139.053	w/o MS2:Salicylic Acid	[M+H]+	33109	8111	549.199	5561	10851	10983	549.199	5492	38241	549.199	31855	9622
436	16.556	140.07	w/o MS2:NIACINAMIDE	[M+H]+	437.979	9687	437.979	437.979	437.979	437.979	437.979	13907	437.979	437.979	437.979	4380
443	0.766	143.018	w/o MS2:kojic acid	[M+H]+	70394	29797	14839	35258	23742	22414	13462	22362	52301	15481	41988	20535
450	17.868	145.049	w/o MS2:NIACINAMIDE	[M+ACN+Na]+	31776	31900	28896	68312	27383	55538	56081	134552	53389	91890	85818	55917
481	0.91	147.075	w/o MS2:Glutamine (L)	[M+H]+	23181	32598	56011	34554	44479	45518	61812	37685	14857	73581	6772	22044
482	16.363	147.115	w/o MS2:COUMARIN	[M+H]+	15601	30365	127719	12694	47832	90233	81332	17447	17885	36629	8262	15723
511	4.964	148.11	w/o MS2:Mevalonic Acid Lactone	[M+H]+	14350	1434.97	1434.97	1434.97	1434.97	1434.97	1434.97	1434.97	24443	1434.97	22403	1434.97
512	20.444	149.022	w/o MS2:4-Hydroxy-6-Methylpyran-2-One	[M+H]+	188669	99894	104957	98438	158357	158369	184761	93168	66084	100388	152475	140285
525	21.925	149.095	w/o MS2:ANETHOLE	[2M+H]+	178667	241315	465244	312438	596082	567392	529018	275477	208141	385512	182095	416759
548	21.245	151.074	w/o MS2:Xylose	[M+H]+	99755	137461	741133	203988	228920	403116	452517	262470	110787	389779	107681	126674
553	20.143	151.111	w/o MS2:Thymol//carvone	[M+H]+	285313	394798	25320.7	258356	253207	260280	25320.7	443925	342145	25320.7	328190	429669
554	1.814	152.01	w/o MS2:N-Methyl-L-proline	[M+H]+	15548	73811	1409.13	14091	14316	49161	1409.13	39941	57834	1409.13	23602	59128
557	6.142	152.061	w/o MS2:2-hydroxyacetanilide	[M+H]+	43080	8711	824.221	8356	15351	9352	824.221	8242	36168	824.221	41869	9365
559	1.884	153.017	w/o MS2:Diallyl Sulfide	[M+H]+	115460	179859	128085	49610	173565	73920	92988	95419	105756	84286	175996	154756
565	19.702	153.053	w/o MS2:4-ACETOXYPHENOL	[M+H]+	276328	316117	129166	220358	242244	244698	89738	305438	290740	63608	277021	279655
569	0.763	155.018	w/o MS2:terrein	[M+H]+	71165	37295	26154	40326	29369	26769	19756	30960	52823	23616	46327	26083
570	17.086	155.084	w/o MS2:terrein	[M+H]+	37888	76403	111324	40313	56099	45935	83934	77973	50963	95367	40444	79530
577	18.483	157.1	w/o MS2:4,5-dihydroxy-3-propylcyclopent-2-en-1-one	[M+Na]+	164308	121810	569153	358949	360200	336673	582820	237867	172797	555866	156506	204184
591	19.315	159.115	w/o MS2:d-LIMONENE	[2M+H]+	9945	22655	181977	29040	36799	88234	118111	16842	12805	158298	16758	15988
612	1.42	161.022	w/o MS2:NIACINAMIDE	[M+H]+	21470	9346	23972	4751	17167	9496	19326	10448	14033	25332	6818	1209
616	17.062	161.095	w/o MS2:Tryptamine	[M+H]+	19124	30672	73682	43854	47116	28355	31031	35658	30243	78832	2007	44274
641	6.366	163.038	w/o MS2:Umbelliferone	[M+H]+	12214	82770	944.45	9727	31061	9444	944.45	73574	20015	944.45	59539	67655
648	0.914	163.039	w/o MS2:(4S,5Z,6S)-4-(2-methoxy-2-oxoethyl)-5-[2-[(E)-3-phenylprop-2-enoyl]oxyethylidene]-6-[(2S,3R,4S,5S,6R)-3,4,5-trihydroxy-6-(hydroxymethyl)oxan-2-yl]oxy-4H-pyran-3-carboxylic acid//4-hydroxycoumarin	[M+H]+	192378	140031	45184	89185	113036	95650	50653	134766	154085	27407	64895	126108
656	17.851	163.06	w/o MS2:Meglutol	[2M+H]+	273474	398592	271176	653482	584502	272406	527591	636890	539676	645910	504541	4717
658	3.131	163.074	w/o MS2:Isosafrole	[M+H]+	127356	213648	60635	131931	170449	174138	12579	146670	198389	43054	229293	187899
663	21.92	163.111	w/o MS2:Anabasine Hydrochloride	[M+H]+	182470	239266	424782	376396	396276	687774	997564	72473	234879	466689	391146	233417
666	8.041	164.106	w/o MS2:N-acetyl-2-phenylethylamine	[M+H]+	7382	738.165	738.165	738.165	738.165	738.165	738.165	738.165	12940	738.165	9223	738.165
667	18.152	164.984	w/o MS2:maltol	[M+H]+	20793	31269	19136	16935	19945	13995	19471	40401	21064	3599	9438	359.92
668	18.377	165.07	w/o MS2:RICININE//coumaric acid	[M+H]+	35849	48629	165228	116236	106371	92434	107621	75575	17699	86682	42515	33135
678	21.924	165.091	w/o MS2:EUGENOL	[M+H]+	3818577	5077005	4440836	4163893	4952896	3534240	10100369	3379594	4368640	4207652	4136658	5500445
683	0.767	167.018	w/o MS2:3-hydroxy-4-methoxy-2,3-dihydropyran-6-one	[M+H]+	43105	16442	7514	18022	11831	10719	5274	9605	28388	7333	22809	10058
686	17.056	167.087	w/o MS2:Isopeonol	[M+H]+	4430	7422	15758	20166	19445	35779	41866	14361	5209	16844	4030	4339
687	1.127	167.104	w/o MS2:3-hydroxy-1-(4-hydroxyphenyl)propan-1-one	[M+H]+	11678	31107	20779	52412	34221	14101	28066	23694	22361	20699	10591	10002
698	2.666	169.013	w/o MS2:Mevalonic Acid Lactone	[M+H]+	271063	347230	65782	292532	409272	336543	79269	539392	351164	51552	298233	274246
699	4.002	169.064	w/o MS2:Glutamine (L)	[M+H]+	44849	202088	14170	64971	115331	62253	26914	150842	46674	8104	163225	91517
702	18.378	169.1	w/o MS2:2-hydroxyacetanilide	[M+ACN+H]+	118775	173996	341000	238589	236676	122348	219409	170441	70801	323287	117042	150050
707	1.173	169.122	w/o MS2:Chrysanthemic Acid// piperitone oxide	[M+H]+	10349	10196	474.031	474.031	4740	4960	474.031	5474	8215	474.031	22323	7612
710	18.622	170.081	w/o MS2:4-ACETOXYPHENOL	[M+H]+	46576	19250	771.665	771.665	7717	8202	771.665	19198	48817	771.665	27328	27540
711	0.874	171.016	w/o MS2:Gallic acid	[M+H]+	1831	1831	23620	1831	1831	1831	18310	1831	1831	31458	1831	1831
723	5.378	172.038	w/o MS2:Phenacylamine Hydrochloride	[M+H]+	2473.51	2473.51	28876	2473.51	2473.51	2473.51	29394	2473.51	2473.51	24735	2473.51	2473.51
726	18.051	173.093	w/o MS2:Thymol	[M+Na]+	128309	144157	3702.38	70247	121891	115817	3702.38	106314	100947	3702.38	66521	37024
746	21.92	175.111	w/o MS2:Theanine	[2M+H]+	24424	90390	174336	137493	39927	56411	259654	41661	23696	327907	73440	90004
747	0.766	175.119	w/o MS2:Gramine	[M+H]+	51678	72031	138927	64165	73520	69657	125889	73810	46740	109701	37907	62314
758	1.25	175.148	w/o MS2:4-hydroxyphenylacetic acid	[M+H]+	63131	38661	17114	30697	43031	32504	19319	86333	68887	15255	34716	76888
759	1.228	177.054	w/o MS2:4-methylumbelliferone	[M+H]+	630066	279201	374441	226375	621571	311656	237434	116716	451732	325706	479324	336105
761	21.924	177.091	w/o MS2:Canavanine	[2M+H]+	325049	429644	527422	352747	396830	620268	942219	90374	192718	786864	359864	236581
762	18.473	177.124	w/o MS2:NEROL	[M+Na]+	3623	8079	27089	9469	22741	14920	22456	11182	135.077	34856	135.077	1351
766	18.485	178.077	w/o MS2:PUTRESCINE DIHYDROCHLORIDE	[M+H]+	1312.08	1312.08	32329	18285	13870	13121	68948	1312.08	1312.08	63870	1312.08	1312.08
772	18.165	179	w/o MS2:Diallyl Trisulfide	[M+H]+	21365	76057	6224	40461	55913	53060	16944	82585	68063	40267	48270	30941
773	18.482	179.084	w/o MS2:4,5-dihydroxy-3-propylcyclopent-2-en-1-one	[M+H]+	130.18	1302	33355	31562	15361	32395	85828	9742	130.18	38550	130.18	130.18
779	11.261	179.142	w/o MS2:MENTHOL(-)	[M+H]+	541.251	10916	331365	10586	50457	28904	86700	8727	541.251	59220	541.251	5413
786	1.689	180.005	w/o MS2:Xanthopterin	[M+H]+	5841	12507	584.066	584.066	10133	9834	584.066	17127	22307	584.066	21625	21507
787	1.283	181.05	w/o MS2:THEOBROMINE/homovanillic acid	[M+H]+	5620	15052	15740	1176	16788	7898	14720	6103	18226	5282	5687	13166
790	18.371	181.101	Unknown//caffeic acid	[M+Na]+	26198	30019	153975	94619	54629	52334	35367	32407	47024	95802	7276	32929
805	3.448	183.028	w/o MS2:PUTRESCINE DIHYDROCHLORIDE	[M+H]+	19786	17525	833.556	8336	19055	29026	833.556	55552	50988	833.556	26358	17711
806	5.378	183.055	w/o MS2:4-O-Methylphloracetophenone	[M+H]+	2288.75	2288.75	34079	2288.75	2288.75	2288.75	54110	2288.75	2288.75	22887	2288.75	2288.75
812	1.984	184.051	w/o MS2:HISTAMINE DIHYDROCHLORIDE	[M+H]+	6966	20361	362.192	362.192	3622	4790	362.192	12472	8681	362.192	8127	16387
845	3.992	184.087	w/o MS2:3-phenyllactic acid	[M+H]+	161676	67585	10411	25486	17909	137736	16364	126030	105812	5335	133293	138495
856	0.872	185.032	w/o MS2:Glutamine (L)	[M+H]+	1601	17522	183160	37814	39522	29386	136536	25914	2498	184557	1556	7383
857	1.986	185.059	w/o MS2:Isosafrole	[M+H]+	138434	73420	10282	86532	68595	35284	16514	223156	42005	34822	144337	94695
867	1.322	186.068	w/o MS2:2,6-Dimethoxyquinone	[M+H]+	3576	10169	357.615	357.615	357.615	357.615	357.615	6304	7058	357.615	9684	4699
868	10.983	186.091	w/o MS2:Norharman	[M+H]+	1784.39	1784.39	18017	1784.39	1784.39	1784.39	25922	1784.39	1784.39	17844	1784.39	1784.39
870	21.927	187.111	w/o MS2:PYRIDOXINE	[M+Na]+	10260	19062	102326	77244	92674	69375	150710	57180	25788	187841	22560	13706
880	17.088	189.069	w/o MS2:Thymol	[M+H]+	11220	38363	8943	71832	57178	6435	79458	30600	19451	66055	17919	17934
884	21.926	189.126	w/o MS2:2-Methyl Gramine	[M+CH3OH+H]+	19412	27257	65759	10871	25417	20191	86312	15116	18539	18605	12615	37104
889	0.864	190.012	w/o MS2:2-hydroxyacetanilide	[M+H]+	1381.92	1381.92	13819	1381.92	1381.92	1381.92	24272	1381.92	1381.92	14713	1381.92	1381.92
892	21.924	191.106	w/o MS2:LIGUSTILIDE	[2M+H]+	209972	280749	373283	358947	383067	328592	565113	110461	210089	438361	365375	274188
898	8.693	191.179	w/o MS2:Caryophyllene [T(-)]	[M+H]+	21678	31118	20198	24177	16211	7962	41023	53098	26361	21598	8940	12538
899	18.796	192.062	w/o MS2:PYRIDOXINE	[M+H]+	15567	22584	130.894	130.894	130.894	1309	130.894	8382	23547	130.894	20983	130.894
900	17.244	192.137	w/o MS2:Lupinine	[M+H]+	7837	608.026	608.026	608.026	608.026	608.026	608.026	608.026	12650	608.026	6080	608.026
901	18.477	193.1	w/o MS2:Chrysanthemyl Alcohol	[M+ACN+H]+	1729.41	1729.41	67333	22835	19188	17294	72214	1729.41	1729.41	37370	1729.41	1729.41
906	13.395	193.121	w/o MS2:L-citrulline	[M+H]+	12728	4465	32193	32720	34144	18138	29698	60715	30653	26097	38967	12509
908	7.494	194.081	w/o MS2:4-methylumbelliferone	[M+H]+	2080.36	2080.36	41282	2080.36	2080.36	2080.36	39127	2080.36	2080.36	20804	2080.36	2080.36
909	1.316	195.029	w/o MS2:Metameconine	[2M+H]+	114.824	11144	13943	114.824	2320	1187	10011	8308	114.824	3634	114.824	1148
910	18.467	195.116	w/o MS2:MENTHOL(-)	[M+Na]+	35042	76322	143789	152716	150194	144978	257550	95912	30694	250767	2130	4767
915	16.459	195.137	w/o MS2:Pelletierine Hydrochloride	[M+CH3OH+H]+	499.526	499.526	131000	20772	4995	13406	72146	499.526	499.526	106496	499.526	499.526
916	1.988	196.052	w/o MS2:esculetin	[M+H]+	36656	39908	695.125	8248	6951	11293	695.125	17954	12757	695.125	14793	22487
917	11.75	196.112	w/o MS2:Glucosaminic Acid	[M+H]+	416.774	416.774	55174	4168	26399	27940	38960	416.774	416.774	36508	416.774	416.774
918	2.666	197.008	w/o MS2:ALLANTOIN	[M+H]+	156960	1357706	197532	835747	1042258	1076564	170269	1427922	1035730	156176	991012	705552
919	4.257	197.048	w/o MS2:Xanthone/salvianilic acid	[M+H]+	6469	94422	646.883	9320	13652	29051	646.883	22211	26606	646.883	8212	27069
923	1.814	197.06	w/o MS2:Xanthone	[M+H]+	296264	240087	3721.39	150182	37214	141422	3721.39	175122	225228	3721.39	152355	241341
933	1.812	198.067	w/o MS2:LEVODOPA	[M+CH3OH+H]+	173752	297782	10334.7	103347	278094	232948	10334.7	391235	187696	10334.7	184511	190250
936	2.928	199.075	w/o MS2:Mimosine	[M+H]+	60903	127314	13001	127114	101281	59942	18446	212279	129862	8139	114229	37011
941	16.904	199.148	w/o MS2:GUAIAZULENE	[M+H]+	15131	41400	137813	51838	51469	79261	113711	39402	11393	195292	11529	17961
942	5.375	201.044	w/o MS2:Isosafrole	[M+CH3OH+H]+	1495.22	1495.22	14952	1495.22	1495.22	1495.22	21672	1495.22	1495.22	24398	1495.22	1495.22
943	1.979	201.054	w/o MS2:HISTAMINE DIHYDROCHLORIDE	[M+H]+	25014	10481	1197	2330	15840	5746	1209	8048	15946	119.683	15368	16527
962	0.778	203.049	w/o MS2:THYMOQUINONE	[M+ACN+H]+	40264	32368	1614.21	28886	16142	16499	1614.21	22573	63343	1614.21	30204	21701
965	17.07	203.143	w/o MS2:(4S,5Z,6S)-4-(2-methoxy-2-oxoethyl)-5-[2-[(E)-3-phenylprop-2-enoyl]oxyethylidene]-6-[(2S,3R,4S,5S,6R)-3,4,5-trihydroxy-6-(hydroxymethyl)oxan-2-yl]oxy-4H-pyran-3-carboxylic acid	[M+H]+	16149	19528	55629	12752	33898	91468	67009	22726	30457	95488	17461	26281
977	2.24	204.065	w/o MS2:2,8-quinolinediol	[M+H]+	483.534	483.534	364994	9307	29893	13097	117107	4835	483.534	19385	483.534	483.534
978	0.998	205.097	w/o MS2:TRYPTOPHAN	[M+H]+	11434	14885	7152	9327	23524	15942	7917	13636	9512	11666	5003	6604
980	21.925	205.122	w/o MS2:1-[4-hydroxy-3-(3-methylbut-2-enyl)phenyl]ethanone	[2M+H]+	319867	315670	766365	161751	147436	485888	811009	115736	311519	1085813	539618	371082
981	9.368	205.158	w/o MS2:3-Amino-Beta-Pinene	[M+H]+	43710	73568	93546	95143	71807	76668	89179	37189	20148	45305	56464	87500
985	8.094	207.175	w/o MS2:Carylophyllene Oxide	[M+H]+	12336	1301	129.11	129.11	129.11	1291	129.11	129.11	23141	129.11	26310	129.11
988	20.054	208.133	w/o MS2:Salsolidine	[M+Na]+	12526	1252.59	1252.59	1252.59	1252.59	1252.59	1252.59	1252.59	38016	1252.59	23274	1252.59
998	0.762	210.994	w/o MS2:AZELAIC ACID	[2M+H]+	35848	9519	488.588	11828	7411	8006	488.588	6236	28320	488.588	23042	4886
999	4.891	211.06	w/o MS2:MUCIC ACID	[M+H]+	353.867	353.867	53371	353.867	3539	4969	71091	353.867	353.867	33775	353.867	353.867
1013	4.111	212.083	w/o MS2:isoferulic acid	[M+H]+	254861	58694	46743	280109	45432	76231	69350	80138	304288	43528	219362	209196
1014	3.127	213.04	w/o MS2:Juarezic Acid	[M+H]+	458666	790682	151265	582127	485598	403405	155108	534604	582498	91058	776347	410742
1020	1.985	213.049	w/o MS2:3-methyl-3,4-dihydro-1H-1,4-benzodiazepine-2,5-dione	[M+H]+	793845	806477	67089	353612	700938	414905	172944	919744	904518	152240	862595	895976
1021	5.78	213.127	w/o MS2:Harmine	[M+H]+	2178.51	2178.51	21785	2178.51	2178.51	2178.51	56773	2178.51	2178.51	53846	2178.51	2178.51
1022	16.461	213.152	w/o MS2:Dihydrojasmonic Acid	[M+H]+	117.109	117.109	48348	117.109	7390	5821	45908	1171	117.109	25605	117.109	117.109
1023	18.649	213.163	w/o MS2:Caryophyllene [T(-)]	[2M+H]+	15535	41005	68200	35825	55552	50856	41402	75087	28490	82458	6485	8035
1026	1.688	214.062	w/o MS2:Citrulline	[M+H]+	92657	307377	9265.75	202660	180688	178618	9265.75	461022	342828	9265.75	196754	102967
1027	1.987	215.07	w/o MS2:4-oxo-5-phenylpentanoic acid	[M+H]+	29008	142028	33396	30236	87258	85397	33646	135025	51371	20905	112023	150974
1028	17.045	215.085	w/o MS2:Harmaline	[M+ACN+Na]+	247.132	247.132	10202	2563	7042	3908	29253	2471	247.132	14981	247.132	247.132
1031	8.966	217.158	w/o MS2:(2R)-2-[(2R,5S)-5-[(2S)-2-hydroxybutyl]oxolan-2-yl]propanoic acid	[M+H]+	26246	62014	1725.07	45609	17251	23476	1725.07	99863	31119	1725.07	29869	29547
1033	0.81	219.026	w/o MS2:THEOBROMINE	[M+H]+	40690	61454	58694	58956	137374	105030	80935	58250	71216	90127	137587	44649
1034	21.922	219.138	w/o MS2:Chrysanthemic Acid, Ethyl Ester	[M+H]+	22342	94079	143247	44294	63531	130905	141625	69633	79588	161133	42842	77945
1037	18.67	219.174	w/o MS2:Muurolladie-3-One	[M+H]+	11887	99698	229917	58001	118531	57101	203993	11200	21458	210985	26465	90384
1038	22.869	221.085	w/o MS2:(5E,8Z)-4,7-dihydroxy-2-methyl-2,3,4,7-tetrahydrooxecin-10-one	[M+H]+	18517	55739	25468	133546	40741	46895	48169	31498	37513	33181	28853	16497
1039	18.485	221.134	w/o MS2:GUAIAZULENE	[M+Na]+	27019	16136	205587	112190	108366	97337	210306	60749	22764	218852	27996	16071
1043	13.146	221.152	w/o MS2:Rhodinyl Acetate	[M+H]+	7689.31	7689.31	337244	7689.31	152208	76893	416342	7689.31	7689.31	352671	7689.31	7689.31
1060	1.81	225.055	w/o MS2:1-hydroxyanthraquinone	[M+H]+	18886	36662	765.215	7652	12706	22743	765.215	47517	23504	765.215	14467	22600
1070	1.812	226.063	w/o MS2:3-[(1-Carboxyvinyl)oxy]benzoic acid	[M+H]+	1366142	1714836	38152	1107873	1376451	1110138	33646	1660794	1424785	75529	1711511	1732328
1071	2.668	227.056	w/o MS2:AZELAIC ACID	[M+H]+	89123	132145	4971	103665	21505	75607	9159	125456	123135	3890	122690	29895
1074	3.128	227.07	w/o MS2:2-METHOXYXANTHONE	[M+H]+	1232858	618684	50499	921582	1065753	579934	84623	1152690	406968	178838	1205127	946486
1075	17.054	227.178	w/o MS2:HUMULENE (alpha)	[M+H]+	9172	16941	39176	19251	33119	47779	63982	35618	20800	59749	1928	24297
1079	3.99	228.078	w/o MS2:MUCIC ACID	[M+H]+	128725	220605	81736	44309	147872	179312	86117	122117	203043	17544	60168	195287
1082	3.379	229.049	w/o MS2:(4S,5Z,6S)-4-(2-methoxy-2-oxoethyl)-5-[2-[(E)-3-phenylprop-2-enoyl]oxyethylidene]-6-[(2S,3R,4S,5S,6R)-3,4,5-trihydroxy-6-(hydroxymethyl)oxan-2-yl]oxy-4H-pyran-3-carboxylic acid	[M+H]+	42083	22847	1677.57	16776	16804	19766	1677.57	46912	43714	1677.57	24129	22480
1087	2.923	229.086	w/o MS2:Xanthyletin	[M+H]+	50890	19259	8197	58859	51786	52048	24636	85469	186105	4899	62152	111034
1088	10.986	229.098	w/o MS2:aspernigrin A	[M+H]+	3539.68	3539.68	277006	3539.68	35397	83021	298553	3539.68	3539.68	229335	3539.68	3539.68
1091	4.77	230.248	Unknown// (5Z)-5-Tetradecen-1-ol	[M+H]+	90214	70599	3557	355.655	18539	60891	355.655	58283	25321	355.655	147017	61103
1093	1.302	231.051	w/o MS2:D-(?)-Quinic acid	[M+ACN+Na]+	7700	3856	7861	114.69	4334	3349	10288	5675	3730	3811	4489	1147
1097	17.086	233.134	w/o MS2:Melatonin	[M+H]+	9955	26240	9398	24476	11087	3079	81717	36676	15786	37300	7508	31963
1098	13.488	233.151	w/o MS2:COSTUNOLIDE	[M+H]+	1907.99	1907.99	112166	1907.99	19080	39851	44348	1907.99	1907.99	81392	1907.99	1907.99
1101	15.761	234.16	w/o MS2:(2R)-2-[(2R,5S)-5-[(2S)-2-hydroxybutyl]oxolan-2-yl]propanoic acid	[M+H]+	1392.19	1392.19	16934	1392.19	1392.19	1392.19	28158	1392.19	1392.19	13922	1392.19	1392.19
1102	18.377	235.148	w/o MS2:Securinine	[M+H]+	45910	65291	97488	101962	60367	99020	97279	64991	27900	92746	43269	57807
1107	8.962	235.169	w/o MS2:(4S,5Z,6S)-4-(2-methoxy-2-oxoethyl)-5-[2-[(E)-3-phenylprop-2-enoyl]oxyethylidene]-6-[(2S,3R,4S,5S,6R)-3,4,5-trihydroxy-6-(hydroxymethyl)oxan-2-yl]oxy-4H-pyran-3-carboxylic acid	[M+H]+	47699	171229	9965	36644	92027	57657	2534	91986	52218	253.435	22518	143019
1115	16.913	239.179	w/o MS2:3-hydroxy-5,5,8a-trimethyl-3,4,4a,6,7,8-hexahydronaphthalene-2-carboxylic acid	[M+H]+	6042	21388	23138	33555	58217	15774	79989	25642	15148	123110	8407	10480
1126	4.112	240.078	w/o MS2:isofraxidin	[M+H]+	2303002	1397621	1049275	1727541	1975633	2129433	581123	2382129	1228922	828541	2314345	2287622
1128	18.087	240.233	w/o MS2:(4,8,8-trimethyldecahydro-1,4-methanoazulen-9-yl)methanol	[M+H]+	18999	49212	32412	31048	32526	27775	14725	11552	26316	19043	21062	29660
1129	1.801	241.05	w/o MS2:danthron	[M+H]+	38562	73563	8399	31129	26671	35146	8250	24414	63603	825.038	12939	16157
1132	4.641	241.085	w/o MS2:2',4-Dihydroxychalcone	[2M+H]+	15300	7237	116.234	116.234	116.234	116.234	116.234	1162	6303	116.234	4855	1202
1133	18.61	241.097	w/o MS2:2',4'-Dihydroxychalcone	[M+H]+	12441	20406	807.728	9995	8077	10600	807.728	25262	20721	807.728	11564	16744
1144	2.924	242.094	w/o MS2:Zeatin	[M+H]+	44495	111643	6942	68658	55088	33988	21888	102403	347396	17819	243077	188689
1151	1.493	245.045	w/o MS2:isofraxidin	[M+H]+	54304	22881	1246	25673	88888	42210	4978	72729	65578	124.629	40577	130993
1153	0.766	245.051	w/o MS2:flavone	[M+H]+	221775	113367	56630	113193	96010	87203	49343	89100	151694	56008	127779	74230
1154	11.771	245.138	w/o MS2:(5E)-3,4,9-trihydroxy-2-propyl-2,3,4,7,8,9-hexahydrooxecin-10-one	[M+H]+	1186	3509	118.58	12301	118.58	118.58	118.58	26466	17505	118.58	31230	18070
1155	23.13	245.154	w/o MS2:KOBUSONE	[M+H]+	17931	46375	32210	35293	40832	35247	19987	41187	60168	29352	24057	68969
1159	17.046	246.14	w/o MS2:aspernigrin A	[M+H]+	472.343	472.343	5081	472.343	472.343	472.343	9347	472.343	472.343	4723	472.343	472.343
1160	16.928	247.148	w/o MS2:lenticin	[M+H]+	1171.73	1171.73	38016	11717	21332	14431	41600	1171.73	1171.73	28877	1171.73	1171.73
1165	18.065	249.067	w/o MS2:3-(4-hydroxy-5-oxo-3-phenyl-2H-furan-2-yl)propanoic acid	[M+H]+	93712	87394	130541	96647	105137	97232	73544	145685	84874	118661	83867	101396
1166	18.48	249.163	w/o MS2:2-hydroxyalantolactone	[M+H]+	6601	16497	74735	7820	56447	55297	141327	34384	18229	78339	6148	23280
1169	13.044	249.185	w/o MS2:Pechueloic Acid	[M+H]+	29505	63013	48204	56758	29898	67151	96242	61942	45773	75569	45638	55980
1176	8.075	251.047	w/o MS2:benzyl benzoate	[M+H]+	1631.05	1631.05	25345	1631.05	1631.05	1631.05	37209	1631.05	1631.05	16311	1631.05	1631.05
1177	2.017	251.095	w/o MS2:Citrinin	[M+H]+	116.51	116.51	4837	116.51	1165	116.51	8139	116.51	116.51	3497	116.51	116.51
1178	18.377	251.179	w/o MS2:(3aR,4aS,5S,5aR,6aR)-5-(3-hydroxybutyl)-5a-methyl-3-methylidene-3a,4,4a,5,6,6a-hexahydrocyclopropa[f][1]benzofuran-2-one	[M+H]+	22177	55330	78327	87455	79705	74464	139629	54057	37600	129497	19413	15120
1185	17.058	253.194	w/o MS2:3,8-dihydroxy-3,8-dimethyl-5-propan-2-ylidene-1,2,3a,4,7,8a-hexahydroazulen-6-one	[M+H]+	15968	23513	42566	48886	40558	26967	81622	44126	11467	79815	20907	32916
1186	4.486	254.057	w/o MS2:Kinetin	[M+H]+	25048	16499	1157.96	21724	36051	30338	1157.96	40467	11580	1157.96	32357	19490
1190	8.093	254.997	w/o MS2:(4S,5Z,6S)-4-(2-methoxy-2-oxoethyl)-5-[2-[(E)-3-phenylprop-2-enoyl]oxyethylidene]-6-[(2S,3R,4S,5S,6R)-3,4,5-trihydroxy-6-(hydroxymethyl)oxan-2-yl]oxy-4H-pyran-3-carboxylic acid	[M+H]+	2179.96	2179.96	236523	23963	53551	21800	223473	2179.96	2179.96	76420	2179.96	2179.96
1191	3.129	255.065	w/o MS2:7,8-Dihydroxyflavone	[M+H]+	193309	440829	32249	152661	228034	185837	59496	53004	205091	45620	69700	410051
1192	18.609	255.113	w/o MS2:Obtusaquinone	[M+H]+	29255	18753	1283.84	12838	13096	14079	1283.84	28233	25337	1283.84	18908	21524
1193	13.522	255.176	w/o MS2:6,4'-Dihydroxyflavone	[M+H]+	234.88	234.88	2349	21967	7863	13103	25635	234.88	234.88	9779	234.88	234.88
1196	1.807	256.074	w/o MS2:Securinine	[M+H]+	573132	587953	278913	516753	488294	204513	285730	828056	649068	255236	173650	631101
1198	0.886	256.962	w/o MS2:5,7-Dihydroxyflavanone	[M+H]+	209.153	2092	31533	17332	18500	10022	33494	3092	209.153	31589	209.153	209.153
1199	1.976	257.047	w/o MS2:Anhydrobrazilic Acid	[M+H]+	9939	6068	38182	13724	13389	36182	40667	6518	16116	128795	3705	8815
1200	14.064	257.226	w/o MS2:(6E)-2,6,10-trimethyldodeca-6,11-diene-2,3,10-triol	[M+H]+	6884	55710	688.366	7866	21088	9182	688.366	42147	20721	688.366	16356	50829
1205	1.966	258.053	w/o MS2:Cystine	[M+CH3OH+H]+	873740	1253163	4799246	1369962	2398506	2283982	4640996	983096	934203	3778252	546396	977988
1206	2.936	258.087	w/o MS2:danthron	[M+H]+	161185	147901	15273	44337	123935	42646	23076	144449	245709	14299	175505	143654
1208	7.722	258.11	w/o MS2:9-Methoxy-2,2-dimethyl-2,6-dihydro-pyrano[3,2-c]quinolin-5-one	[M+H]+	31359	31277	1181	23567	31393	19529	1921	46640	31280	118.114	18755	42540
1209	3.13	259.06	w/o MS2:norlichexanthone	[M+H]+	26432	28926	1165.14	18803	29372	13712	1165.14	20080	11651	1165.14	16567	35337
1210	17.045	259.148	w/o MS2:2-methoxy-5-methyl-3-(2-methylbut-3-en-2-yl)chromen-4-one	[M+Na]+	133.69	1337	35894	133.69	8451	14643	27438	13894	133.69	16201	133.69	133.69
1226	0.767	261.027	w/o MS2:Ethyl ?-D-glucuronide	[2M+H]+	15974	8011	801.104	13753	11432	10312	801.104	17421	32338	801.104	25959	13146
1227	18.384	261.163	w/o MS2:Cadin-4-En-10-Ol	[M+H]+	16039	39435	95928	38969	24495	33327	64510	20393	23003	55102	9223	32039
1247	7.722	262.05	w/o MS2:N-[1-(4-methoxy-6-oxopyran-2-yl)-2-methylpropyl]acetamide	[M+H]+	216271	281305	183529	86921	242828	248707	189669	290667	247444	161721	233072	286944
1256	2.486	263.055	w/o MS2:Cadaverine Tartrate	[M+H]+	25264	60214	693.754	14035	6938	20619	693.754	62781	13861	693.754	12796	53059
1261	13.12	263.2	w/o MS2:3-methoxy-2-(3-methylbut-2-enyl)-5-pentylphenol	[M+H]+	61325	6168	39184	33789	40426	19237	54481	47271	180812	22712	111973	18971
1267	0.881	266.124	w/o MS2:ANISOMYCIN	[M+H]+	74335	18162	14440	49443	27981	15589	24336	47809	49781	16883	55457	42154
1270	22.874	266.999	w/o MS2:Cearoin	[M+H]+	44446	52472	19225	103656	30110	29934	18815	45529	54388	28934	37306	9049
1271	2.423	267.067	w/o MS2:Cearoin	[M+H]+	32451	29103	37807	10769	28314	37060	32883	11342	17400	20594	22281	16818
1274	25.847	267.112	w/o MS2:(E)-5-(4-methoxy-5-methyl-6-oxopyran-2-yl)-3-methylhex-4-enoic acid	[M+H]+	199.282	199.282	27871	14993	30801	31775	15587	199.282	1993	10914	7158	15461
1282	5.766	268.119	w/o MS2:Citrinin	[M+H]+	37621	16257	579.193	5792	24921	11267	579.193	14489	26613	579.193	29177	12068
1284	3.252	269.044	w/o MS2:2,3',4,6-Tetrahydroxybenzophenone	[2M+H]+	78090	112538	5565	58240	67548	74762	14024	36300	71101	556.464	64575	91426
1285	3.122	269.079	w/o MS2:(2S)-2-[(1S,2R)-1,2-dihydroxypentyl]-4-methoxy-2,3-dihydropyran-6-one	[M+H]+	5777	5704	120.445	120.445	1204	1331	120.445	5236	10974	120.445	11612	3683
1286	16.903	269.189	w/o MS2:3-[4-methyl-1-(2-methylpropanoyl)-3-oxocyclohexyl]butanoic acid	[M+H]+	1107.84	1107.84	11583	1107.84	1107.84	1107.84	15300	1107.84	1107.84	11078	1107.84	1107.84
1295	2.924	270.089	w/o MS2:Linamarin	[M+H]+	2291088	1844969	457438	1371052	1393647	1919376	160996	2466669	2079260	457704	1568223	212781
1296	2.928	270.134	w/o MS2:Methyl 3,4,5-trimethoxycinnamate	[M+H]+	7110	5558	555.758	555.758	555.758	555.758	555.758	18767	20205	555.758	10898	555.758
1298	1.372	270.169	w/o MS2:(8aR,12S,12aR)-12-hydroxy-4-methyl-4,5,6,7,8,8a,12,12a-octahydro-1H-3-benzoxecine-2,9-dione	[M+H]+	977.645	977.645	23090	977.645	977.645	977.645	22964	977.645	977.645	9776	977.645	977.645
1300	11.305	271.06	w/o MS2:Genistein	[M+H]+	15826	17167	111030	1582.6	30879	62601	114829	19163	17919	105389	17258	41010
1303	17.048	271.204	w/o MS2:Baicalein	[M+CH3OH+H]+	114.282	114.282	6838	114.282	1327	1143	4355	114.282	114.282	8159	114.282	114.282
1307	3.206	272.068	w/o MS2:Djenkolic Acid	[M+H]+	691469	382216	28211	272274	389791	458468	38974	460846	486606	35639	633277	369130
1314	1.813	273.04	w/o MS2:7-Aminocephalosporanic Acid	[2M+H]+	218341	268632	16368.3	163683	253908	237906	16368.3	268444	231404	16368.3	208776	536032
1315	4.653	274.274	w/o MS2:Palmitic Acid//2,2’-(Dodecylimino)diethanol	[M+H]+	263954	550967	156656	3814.5	430721	460709	38145	669799	656458	225899	576506	607638
1316	0.767	275.061	w/o MS2:(4aR,5S,6S,8R,8aS)-6-hydroxy-3,8-dimethyl-5-propan-2-yl-4a,5,6,7,8,8a-hexahydro-1H-naphthalen-2-one	[M+ACN+H]+	30599	15003	12253	16544	11822	9944	9029	11933	21180	11307	14594	7304
1317	17.049	275.18	w/o MS2:(4aS)-6,7-dihydroxy-1,1,4a-trimethyl-3,4,10,10a-tetrahydro-2H-phenanthren-9-one	[M+Na]+	42697	24577	33158	31118	52725	57953	108559	50012	26137	84057	39225	54372
1323	0.772	277.085	w/o MS2:3-(alpha,alpha-dimethylallyl)psoralen	[M+CH3OH+H]+	68810	32623	12717	35407	21491	24441	9240	24191	66350	10272	35856	18619
1324	22.08	277.18	w/o MS2:shogaol	[M+H]+	74345	182353	15697	139359	124283	109036	5396	180573	138101	8208	78340	92830
1334	17.64	279.197	w/o MS2:(6E)-2,6,10-trimethyldodeca-6,11-diene-2,3,10-triol	[M+H]+	6862	35381	127.849	127.849	127.849	127.849	127.849	33728	2759	127.849	1278	21976
1337	9.013	279.232	w/o MS2:ISOPALMITIC ACID	[M+H]+	33196	13824	17408	9638	12331	33536	36572	30847	20839	13372	35810	15334
1339	0.979	280.139	w/o MS2:8-hydroxy-5,8a-dimethyl-3-methylidene-3a,4,4a,8,9,9a-hexahydrobenzo[f][1]benzofuran-2,7-dione	[M+H]+	6805	10069	117.59	117.59	117.59	117.59	117.59	11005	1244	117.59	1176	4946
1345	22.873	281.052	w/o MS2:3-[(E)-2-(3-hydroxyphenyl)ethenyl]-5-methoxyphenol	[M+H]+	84113	39415	17288	144877	18597	21055	39821	36283	32495	28881	13974	34655
1347	18.106	281.092	w/o MS2:7-methoxy-8-(3-prop-1-en-2-yloxiran-2-yl)chromen-2-one	[M+H]+	29328	48306	1118.99	25273	34565	11190	1118.99	32782	44880	1118.99	36720	29002
1348	17.082	281.19	w/o MS2:(1R,2E,7R,10E,12S,13S,15R)-12,15-dihydroxy-7-methyl-8-oxabicyclo[11.3.0]hexadeca-2,10-dien-9-one	[M+H]+	118.584	118.584	4472	6420	12265	8499	6733	1214	118.584	1186	118.584	118.584
1349	10.452	281.248	w/o MS2:Chaulmoogric Acid	[M+H]+	2791.34	2791.34	68528	2791.34	44121	45259	70872	47798	35423	62919	27913	42572
1353	18.611	283.107	w/o MS2:cyclo(tyrosyl-prolyl)	[M+H]+	22665	41150	1602.37	16207	18738	16549	1602.37	33509	16024	1602.37	23578	25352
1354	5.729	283.169	w/o MS2:(5S)-5-hydroxy-1,7-diphenylheptan-3-one	[M+H]+	3572	357.249	13171	357.249	7823	8975	21056	16213	14213	33589	357.249	357.249
1355	18.474	283.204	w/o MS2:(2S,8R)-8-hydroxy-2-[(1S)-1-hydroxyheptyl]-2,3,4,6,7,8-hexahydrochromen-5-one	[M+CH3OH+H]+	594.247	594.247	19306	6398	8083	5942	37190	594.247	594.247	18517	594.247	594.247
1362	17.77	283.264	w/o MS2:6,3'-Dimethoxyflavone	[M+H]+	3279	3890	256262	1296	6122	254892	107915	299453	1488	210239	234120	1353
1367	3.242	284.115	w/o MS2:Lotaustralin	[M+H]+	13556	24263	370.83	370.83	12213	12554	370.83	4320	3708	370.83	370.83	10805
1368	18.404	284.294	Unknown//Stearamide	[M+H]+	27278	9547	18497	17732	17840	11083	55460	25931	15358	14033	32147	954.737
1373	2.667	285.04	w/o MS2:rhein	[M+CH3OH+H]+	213447	410792	57537	65194	184351	136911	29295	327408	191769	21554	217743	185717
1377	4.038	285.076	w/o MS2:inermin	[M+H]+	1308061	1312540	1001249	898892	1057176	1100382	548953	1190216	1192945	516581	1120670	1154355
1379	1.238	285.076	w/o MS2:Acacetin	[M+H]+	1448738	1323148	1913224	1581152	1646206	1529329	2147052	1397759	1567979	1980040	1512967	1367202
1380	1.238	285.123	w/o MS2:Prolylyphenylalanine	[M+H]+	35398	37109	58892	43376	49764	38286	69371	39193	40889	59552	36606	34852
1388	1.138	287.055	Unknown//Kaempferol	[M+H]+	1503687	445571	733052	1479756	1356445	231229	1388495	1910098	339814	2263563	1755253	1002114
1389	1.418	287.055	Unknown//Kaempferol	[M+H]+	1644368	774358	1427504	1252274	1644558	1576572	1306249	1573718	1781592	1225892	1480855	1506868
1390	1.005	287.055	w/o MS2:Fisetin	[M+H]+	1155643	228162	549873	751022	245765	720349	577164	269167	381041	230244	952517	879737
1391	10.383	287.055	w/o MS2:3',4',5,7-tetrahydroxyflavone	[M+H]+	142785	185233	579332	136429	155305	305079	573186	190352	87353	526787	153194	180447
1396	4.112	287.056	w/o MS2:3',4',5,7-tetrahydroxyflavone	[M+H]+	461874	388797	105202	285363	261090	83252	41186	446975	311277	72141	328047	153252
1398	17.077	287.182	w/o MS2:Kaempferol	[M+H]+	206.182	7565	34454	2062	18778	21104	19175	27181	206.182	31554	206.182	8334
1404	1.649	288.063	w/o MS2:Cyanidin	[M+H]+	1640985	1267951	237943	882663	1113016	884662	119605	1450348	1649762	197104	1757026	1356821
1405	1.411	289.049	w/o MS2:Citrinin	[M+ACN+Na]+	12120	10888	741.245	39725	12513	7412	741.245	16709	11118	741.245	16950	12500
1406	1.337	289.052	Unknown//Eriodictyol	[M+ACN+Na]+	4994	4284	393.931	15057	3939	10046	393.931	26327	9496	393.931	14381	22817
1407	18.376	289.194	w/o MS2:(2S,3S)-3,5,7-trihydroxy-2-(4-hydroxyphenyl)-2,3-dihydrochromen-4-one	[M+H]+	12252	15961	70825	19153	21198	26783	14257	18158	7798	38915	3896	8634
1409	7.666	289.215	w/o MS2:Epitestosterone	[2M+H]+	116.162	116.162	18202	116.162	1162	116.162	21351	116.162	116.162	6824	116.162	116.162
1410	1.187	291.098	w/o MS2:(8aR,12S,12aR)-12-hydroxy-4-methyl-4,5,6,7,8,8a,12,12a-octahydro-1H-3-benzoxecine-2,9-dione	[M+H]+	122.333	10604	122.333	122.333	2533	1223	122.333	12450	1438	122.333	122.333	14448
1412	17.06	291.209	w/o MS2:Epiandrosterone	[2M+H]+	9961	32703	22498	12083	22171	55259	60041	17850	13003	19725	7396	7847
1413	1.127	292.139	w/o MS2:4-hydroxy-8-methoxy-5-methyl-3-(3-methylbut-2-enyl)chromen-2-one	[M+H]+	5683	1462	146.161	146.161	2522	2614	146.161	146.161	12319	146.161	5785	146.161
1414	0.807	293.063	w/o MS2:3-(alpha,alpha-dimethylallyl)psoralen	[M+H]+	181713	185494	421556	229184	382450	226128	425969	131536	343777	534251	287052	188973
1415	1.255	293.139	w/o MS2:curvularin	[M+ACN+Na]+	36661	22194	135.349	1353	12666	5812	135.349	20389	20126	135.349	19980	7410
1417	1.939	293.211	w/o MS2:8-[3-oxo-2-[(E)-pent-2-enyl]cyclopenten-1-yl]octanoic acid	[M+H]+	1834.43	1834.43	24069	1834.43	18344	24797	36148	1834.43	1834.43	20222	1834.43	1834.43
1419	2.42	294.051	w/o MS2:methyl 2-[(2,3-dihydroxybenzoyl)amino]-3-hydroxypropanoate	[M+H]+	30316	72141	131217	26910	48048	65323	47558	68716	58537	48488	35205	21974
1421	0.992	294.156	w/o MS2:4-oxo-4-(3-oxodecan-2-ylamino)butanoic acid	[M+H]+	22629	68744	23137	31592	18357	20762	3546	28876	69869	1153	11781	20409
1423	0.793	296.065	w/o MS2:9-Methoxy-2,2-dimethyl-2,6-dihydro-pyrano[3,2-c]quinolin-5-one	[M+H]+	611.185	7053	183984	27268	31618	32702	189864	18617	611.185	169641	611.185	6112
1425	5.766	296.068	w/o MS2:9-Methoxy-2,2-dimethyl-2,6-dihydro-pyrano[3,2-c]quinolin-5-one	[M+H]+	1032584	888175	219871	620726	722917	740595	229774	832919	552913	199863	998552	732972
1429	3.258	297.039	w/o MS2:2-(7-methoxy-2-oxochromen-8-yl)-3-methylbut-2-enal	[M+H]+	48237	31438	1142.85	11428	24190	39058	1142.85	40527	59071	1142.85	35693	64563
1430	5.492	297.196	w/o MS2:(2E,4E,8E)-7,13-dihydroxy-4,8,12-trimethyltetradeca-2,4,8-trienoic acid	[M+H]+	3707.03	3707.03	57719	3707.03	3707.03	3707.03	98535	3707.03	3707.03	37070	3707.03	3707.03
1435	4.595	298.083	w/o MS2:(Z)-2-methyl-4-[(2R,3R,4S,5S,6R)-3,4,5-trihydroxy-6-(hydroxymethyl)oxan-2-yl]oxybut-2-enenitrile	[M+H]+	7418410	939829	2970521	1166913	1170053	2120859	773027	1334503	1187498	627501	2343555	2755652
1443	19.074	298.274	w/o MS2:Chaulmoogric Acid	[M+ACN+H]+	147227	190113	207775	228908	364942	373017	130066	477992	377849	251162	364175	245050
1449	2.666	299.055	w/o MS2:cyclo(tyrosyl-prolyl)//trihydroxymethoxyflavone	[M+H]+	847244	1194296	208038	412003	563113	521416	218873	598648	481417	205676	837648	554375
1450	7.119	299.091	w/o MS2:RETUSIN 7-METHYL ETHER	[M+H]+	196564	62266	183371	65543	159543	306855	778389	163857	258883	217616	98866	416481
1452	7.574	299.19	w/o MS2:2'-Methoxyformonetin	[M+H]+	17792	69444	28657	67947	90638	105176	53957	69884	48885	4129	89177	93987
1453	19.917	299.198	w/o MS2:5-amino-3-[(2E)-2-(3,5-dimethyl-2-oxocyclohexylidene)ethyl]-5-oxopentanoic acid	[M+Na]+	5011	13253	66817	24583	22129	21356	41403	5105	201.152	68221	201.152	2012
1463	3.229	300.111	w/o MS2:Dehydrovariabilin	[M+H]+	52710	28418	659.521	9962	12965	6595	659.521	17721	13954	659.521	18070	23797
1464	7.656	300.191	w/o MS2:(5S)-5-hydroxy-1,7-diphenylheptan-3-one	[M+H]+	10072	6793	49807	3106	20157	16071	46469	5428	9634	16159	20738	9619
1465	15.763	300.207	w/o MS2:Dehydroabietamide	[M+H]+	632.393	632.393	17720	632.393	632.393	632.393	26839	632.393	632.393	6324	632.393	632.393
1467	1.81	301.035	w/o MS2:Indigo Carmine	[M+H]+	4420132	5440378	74049	3344487	3829368	3729393	93379	4813206	4290050	39529	4519394	4936635
1468	1.823	301.068	w/o MS2:3-(5,7-dimethoxy-4-oxochromen-2-yl)propanoic acid	[M+H]+	34818	22975	621698	56369	95848	113904	430419	47465	57174	616913	41079	6724
1469	2.511	301.07	w/o MS2:3-(5,7-dimethoxy-4-oxochromen-2-yl)propanoic acid	[M+H]+	1048860	1890751	151107	1331184	817200	895400	86399	1916943	593518	234409	2010982	1378910
1472	2.78	301.07	w/o MS2:Koparin	[M+H]+	251520	150866	204546	261387	228790	223976	304075	269945	459913	227426	308641	202444
1474	1.531	301.071	w/o MS2:Fallacinol	[M+H]+	1210545	1198930	18759	727140	864797	937834	20904	1204326	1315638	33288	1286276	1180718
1475	1.121	301.071	w/o MS2:isokaempferide	[M+H]+	961241	584018	287882	805166	773480	371623	552626	973891	691612	608952	749845	485079
1476	1.969	301.071	w/o MS2:Diosmetin	[M+H]+	40717	250078	319928	283503	208106	404989	546229	64407	80837	363829	53853	114874
1478	0.905	301.071	w/o MS2:carviolin	[M+H]+	302844	98878	61946	107367	122961	115416	97031	101054	232991	102441	211991	84561
1479	1.534	301.118	w/o MS2:violaceol i	[M+H]+	13799	15396	1172	117.194	5429	5949	2185	8183	16520	5971	6586	8185
1480	17.943	301.141	w/o MS2:angoletin	[M+H]+	31702	31085	3864	67290	29419	34090	20436	24722	69573	4441	42430	47491
1481	20.636	301.179	w/o MS2:adrenosterone	[M+H]+	56040	61433	2509	43814	32600	42253	13455	33574	59658	250.932	33952	50149
1482	13.086	301.201	w/o MS2:adrenosterone	[M+H]+	3491	15250	20087	8700	16704	6237	31156	20791	14589	27252	20311	21792
1484	8.593	301.216	w/o MS2:dehydroabietic acid	[M+H]+	14561	60771	592.357	9787	15507	23244	592.357	26874	17414	592.357	5924	23099
1487	2.667	303.05	w/o MS2:Quercetin	[M+H]+	523780	632295	274303	588153	851195	780352	223360	1070173	551448	226510	998988	981621
1488	1.112	303.086	w/o MS2:(2R)-5,8-dihydroxy-2-(2-hydroxyphenyl)-7-methoxy-2,3-dihydrochromen-4-one//ferreirin	[M+H]+	50656	32868	164307	82572	21665	58511	216590	85013	41893	224076	30049	63909
1490	1.549	303.134	w/o MS2:2-(2,6-Dihydroxyphenyl)-3,5,7-trihydroxychromen-4-one	[M+H]+	11534	19655	336564	63289	60431	116121	57276	54882	21492	273470	34751	43464
1491	13.155	303.196	w/o MS2:Hesperetin	[M+H]+	1681.48	1681.48	59063	1681.48	37340	16815	96926	1681.48	1681.48	36149	1681.48	1681.48
1492	17.078	303.211	w/o MS2:Quercetin	[M+H]+	944.494	14806	13192	11623	16339	19386	9806	10189	944.494	9445	944.494	10793
1493	18.093	303.305	Unknown//safingol	[M+H]+	633135	677186	192941	423811	508805	482022	206665	260092	182702	370895	645689	607145
1494	0.861	304.079	w/o MS2:THIAMINE	[M+CH3OH+H]+	673.368	673.368	6734	673.368	673.368	673.368	10392	673.368	673.368	8571	673.368	673.368
1495	20.455	304.262	w/o MS2:D-(-)-salicin	[M+H]+	30717	35969	267856	128362	127049	119038	270809	31626	26557	267804	30951	33560
1497	0.767	305.072	w/o MS2:methyl 3-(3,4-dihydroxy-5-phenyloxolan-2-yl)-3-hydroxypropanoate	[M+H]+	50686	25308	27183	29690	19318	16052	18785	22094	32011	23161	23149	18304
1498	18.063	305.13	w/o MS2:5,9-dihydroxy-7-(hydroxymethyl)-5,7-dimethyl-4,5a,6,8,8a,9-hexahydro-1H-azuleno[5,6-c]furan-3-one	[M+H]+	175975	80427	244169	185246	196562	106951	226682	250869	167362	221731	162751	184237
1499	22.019	305.139	w/o MS2:(1S,8S,9S,10S,13R)-6,9,10-trimethyl-2-oxo-4,14-dioxatetracyclo[7.5.0.0?,??.0?,?]tetradeca-3(7),5-dien-8-yl acetate	[M+H]+	42195	24195	1006.06	10061	23326	14673	1006.06	19678	37648	1006.06	13522	37739
1500	8.99	305.248	w/o MS2:14-(hydroxymethyl)-5,9-dimethyltetracyclo[11.2.1.0?,??.0?,?]hexadecane-5-carbaldehyde	[M+H]+	1486.83	1486.83	54262	1486.83	14868	18910	55895	1486.83	1486.83	83830	1486.83	1486.83
1501	1.193	306.155	w/o MS2:(3,6,9-trimethylidene-2-oxo-3a,4,5,6a,7,8,9a,9b-octahydroazuleno[4,5-b]furan-8-yl) acetate	[M+H]+	818.218	818.218	8182	818.218	818.218	818.218	25867	818.218	818.218	13407	818.218	818.218
1502	7.925	306.279	w/o MS2:[(1R,5R,9S,13S)-5,9,13-trimethyltetracyclo[11.2.1.0?,??.0?,?]hexadec-14-en-5-yl]methanol	[M+H]+	104800	145161	32509	86061	49961	63024	27386	133777	55713	20138	55210	131206
1503	18.721	307.128	w/o MS2:3-[4-methyl-1-(2-methylpropanoyl)-3-oxocyclohexyl]butanoic acid	[M+H]+	16574	5602	538.993	538.993	538.993	538.993	538.993	5390	26115	538.993	12929	538.993
1504	18.625	307.226	w/o MS2:16-Heptadecyne-1,2,4-triol	[M+H]+	101515	1023.52	1023.52	30374	23652	10235	1023.52	1023.52	73801	1023.52	34767	1023.52
1505	18.114	309.086	w/o MS2:5,13,15-trihydroxy-9-methyl-10-oxabicyclo[10.4.0]hexadeca-1(12),13,15-triene-3,11-dione	[M+H]+	20326	29154	125.32	10810	7774	1253	125.32	17951	10476	125.32	11900	6706
1507	18.064	309.087	w/o MS2:salicin	[M+H]+	20326	7485	125.32	9637	6054	1253	125.32	17951	20852	125.32	9259	125.32
1508	18.359	309.222	w/o MS2:isoimperatorin	[M+H]+	514.293	514.293	8036	514.293	514.293	514.293	14034	514.293	514.293	5143	514.293	514.293
1509	11.499	309.278	w/o MS2:sclareol	[M+H]+	696.904	696.904	30879	696.904	19110	29102	54513	17443	10298	38993	6969	16114
1513	15.739	310.16	w/o MS2:(4-oxido-2,3,5,6,7,8-hexahydro-1H-pyrrolizin-4-ium-1-yl)methyl 2,3-dihydroxy-3-methylpentanoate	[M+H]+	17291	25223	18375	35102	20222	22780	23566	18426	22275	32213	16180	17481
1515	6.729	311.056	w/o MS2:Arbutin	[M+H]+	1895466	691092	62338	897540	420842	604326	86546	1033411	1040973	38688	1633123	498361
1533	2.666	313.035	w/o MS2:5-[(E)-2-(3,5-dihydroxyphenyl)ethenyl]-2-methoxybenzene-1,3-diol	[2M+H]+	7924327	10559614	2174562	5733674	6841486	4121460	2368418	9598749	8191895	1859748	9825982	9607521
1537	18.298	313.165	w/o MS2:Thymol-beta-D-glucoside	[M+H]+	25124	314025	840.548	54363	90184	82706	840.548	225000	8405	840.548	38704	154302
1538	17.048	313.165	w/o MS2:Thymol-beta-D-glucoside	[2M+H]+	22332	138054	461.48	26885	28901	19120	461.48	125279	461.48	461.48	4615	138239
1539	8.419	313.179	w/o MS2:Triptophenolide	[M+H]+	13783	18907	590.164	590.164	590.164	590.164	590.164	25335	11397	590.164	7904	5902
1576	4.45	314.079	w/o MS2:ACTIPHENOL	[M+H]+	75401	231631	16852	240655	443383	75023	44360	263656	576638	40400	476925	292302
1581	4.113	315.05	w/o MS2:karanjin	[2M+H]+	8135243	4852665	3360384	5794855	7206523	6935252	3422956	7869941	4268846	2571211	8049664	7704828
1582	4.485	315.085	Unknown//ladanin	[M+H]+	388826	275131	18617	456779	496846	68160	20407	541278	983965	12111	216065	194499
1583	3.384	315.086	w/o MS2:Dipteryxin	[M+H]+	1669617	1666478	125254	796947	1628072	1545792	245583	1514651	1773253	78201	1789226	1484042
1584	7.805	315.163	w/o MS2:Clomipramine	[M+H]+	630541	327446	119803	415593	280977	486936	130928	475495	94423	149803	606085	231815
1586	8.443	315.192	w/o MS2:(2S,3S,4S)-3,4-dihydroxy-6-methoxy-3-methyl-7-methylidene-2-pentyl-2,4-dihydropyrano[2,3-c]pyrrol-5-one	[M+H]+	76592	290009	1004137	337610	541951	577261	558971	146839	197565	812057	147471	296011
1588	18.694	315.193	w/o MS2:1,4a-dimethyl-9-oxo-7-propan-2-yl-3,4,10,10a-tetrahydro-2H-phenanthrene-1-carboxylic acid	[M+H]+	8090	14014	122278	74760	75688	53076	125528	23208	1307	40046	1216	15552
1589	19.379	315.229	w/o MS2:14-(hydroxymethyl)-5,9-dimethyltetracyclo[11.2.1.0?,??.0?,?]hexadecan-5-ol	[M+H]+	128.721	1287	11506	10664	4023	4826	31492	1435	128.721	6245	128.721	128.721
1596	1.649	316.058	w/o MS2:5-[(E)-3-hydroxybut-1-enyl]-4-[4-[(E)-3-oxobut-1-enyl]anilino]oxolan-2-one	[M+H]+	3291530	3860032	472724	2162866	2928049	3063936	285775	3694604	4310570	423401	4135586	3646080
1597	1.49	316.108	w/o MS2:N-Acetylmuramic Acid	[M+H]+	27798	16441	133.936	133.936	1339	133.936	133.936	14485	22328	133.936	16111	7646
1603	1.319	317.03	w/o MS2:3-(5,7-dimethoxy-4-oxochromen-2-yl)propanoic acid	[M+H]+	752149	758652	42922.9	429229	536565	495046	42922.9	717205	699261	42922.9	678487	672205
1604	3.127	317.066	w/o MS2:3-methylquercetin	[M+CH3OH+H]+	409777	336688	42029	245769	291071	94570	51925	555824	325714	86043	657220	301612
1605	11.715	317.178	w/o MS2:Sodium Tetradecyl Sulfate	[M+H]+	36199	96769	176760	741.11	187778	189166	219412	34940	7411	125030	34796	54550
1616	20.262	317.209	w/o MS2:7-(2-hydroxypropan-2-yl)-1,4a-dimethyl-2,3,4,9,10,10a-hexahydrophenanthrene-1-carboxylic acid	[M+H]+	511.3	511.3	114076	5113	7737	10251	106420	511.3	511.3	58007	511.3	511.3
1618	7.409	318.3	Unknown//2-Hydroxyethyl hexadecanoate	[M+H]+	68605	97821	127162	6860.53	155708	134228	122092	168072	80850	144394	106557	138537
1620	6.048	319.188	w/o MS2:(2E,4E,8E)-7,13-dihydroxy-4,8,12-trimethyltetradeca-2,4,8-trienoic acid	[M+H]+	11421	26413	114.72	25198	114.72	1147	114.72	21242	30046	114.72	26922	13893
1625	8.99	319.224	w/o MS2:9-hydroxy-10,12-octadecadienoic acid	[M+H]+	11334	27361	3194	3248	21108	19264	6702	37869	20862	25180	8876	16597
1627	17.915	321.242	w/o MS2:5-(1,2,4a,5-tetramethyl-7-oxo-3,4,8,8a-tetrahydro-2H-naphthalen-1-yl)-3-methylpentanoic acid	[M+H]+	1337	5062	25437	16925	14681	5293	38337	8582	133.733	20946	133.733	133.733
1630	1.464	323.055	w/o MS2:Fallacinol//Rhamnocitrin	[M+H]+	216.576	216.576	8297	2166	216.576	216.576	5917	216.576	216.576	5513	216.576	216.576
1632	0.786	323.064	w/o MS2:(2Z)-4,6-dihydroxy-2-[(3-hydroxy-4-methoxyphenyl)methylidene]-1-benzofuran-3-one	[2M+H]+	26254	12268	1797	16449	10319	7803	1536	3684	14374	153.624	13948	3716
1640	6.745	325.069	w/o MS2:D-(-)-salicin	[M+H]+	25939	18468	188.538	6744	13354	1885	188.538	12094	40538	188.538	24857	7475
1647	17.869	325.113	w/o MS2:Glutathione	[M+H]+	191449	183734	110505	318856	301535	271966	263642	357772	300288	351528	269529	307083
1652	4.449	326.079	w/o MS2:Pangamic Acid Sodium	[M+H]+	5177152	3954278	1197582	4542274	5826492	3709413	1195213	3669989	5344048	635489	4750819	3535819
1654	4.031	327.049	w/o MS2:2-methyl-3-[(2S,3R,4S,5S,6R)-3,4,5-trihydroxy-6-(hydroxymethyl)oxan-2-yl]oxypyran-4-one	[M+H]+	6112	113673	96378	7286	14615	49988	162890	57987	10767	104254	11640	11092
1659	23.31	327.078	w/o MS2:HERALENOL	[M+H]+	535536	228199	292901	372200	226182	312261	263259	196974	224262	155303	144384	176584
1660	7.669	327.232	w/o MS2:hydroquinidine	[M+H]+	120.597	7437	12401	1238	13292	14116	48865	3739	2305	27261	2347	1206
1665	5.605	328.093	w/o MS2:Anabasamine Hydrochloride	[M+CH3OH+H]+	231465	123750	52593	107945	201603	250731	33055	164362	87411	88542	155426	148212
1668	2.931	329.032	w/o MS2:altenusin	[M+H]+	31487	44220	1581.67	28134	15817	28700	1581.67	35628	25113	1581.67	46593	46737
1673	6.725	329.066	w/o MS2:8-(2-hydroxy-1-methoxy-3-methylbut-3-enyl)-7-methoxychromen-2-one	[M+H]+	5091006	3419745	248405	4052846	3209484	3185582	485294	4441136	3022179	340239	7449212	4241392
1674	5.19	329.079	w/o MS2:8-(2-hydroxy-1-methoxy-3-methylbut-3-enyl)-7-methoxychromen-2-one	[M+H]+	8193.15	8193.15	503909	81932	162914	187927	523878	8193.15	8193.15	408128	8193.15	8193.15
1676	18.609	329.113	w/o MS2:Tulipinolide	[M+H]+	64425	78199	120.165	47830	46897	42902	1202	69142	65935	120.165	57406	61798
1677	1.125	329.159	Unknown/Carnosol	[M+H]+	45487	18694	665.876	24847	10527	6659	665.876	28283	18867	665.876	13933	12155
1678	1.274	329.159	w/o MS2:(2R,3S,4S,5R,6S)-2-(hydroxymethyl)-6-(4-hydroxy-2-methyl-5-propan-2-ylphenoxy)oxane-3,4,5-triol	[M+H]+	4688	17041	429.821	429.821	429.821	429.821	429.821	8968	16689	429.821	7106	4298
1679	4.433	329.17	w/o MS2:4-[5-(3,4-dimethoxyphenyl)-3,4-dimethyloxolan-2-yl]phenol	[M+H]+	22901	22597	117.175	1172	2177	29449	117.175	3151	62818	117.175	64349	3121
1686	3.997	330.073	w/o MS2:Glutathione	[M+H]+	36043	111001	9334	27472	60917	143816	18810	72375	31215	7213	58692	144166
1688	7.497	330.097	w/o MS2:4-(3,4-dihydroxyphenyl)-6,7-dihydroxynaphthalene-2-carboxylic acid	[M+H]+	17009	18119	723.074	723.074	9625	7231	723.074	10630	47944	723.074	23924	8215
1690	7.825	330.133	w/o MS2:(E)-N-[2-hydroxy-2-(4-hydroxyphenyl)ethyl]-3-(4-hydroxy-3-methoxyphenyl)prop-2-enamide	[M+H]+	17902	40238	3747	45829	47576	14527	1171	25985	11194	117.126	11543	45357
1691	1.987	331.045	w/o MS2:2'-Methoxyflavone	[2M+H]+	6554820	9283919	2568601	4464996	7249872	5858554	2578264	7294222	8410507	2060074	7709314	8861665
1694	2.666	331.048	w/o MS2:5-Methoxyflavone	[M+CH3OH+H]+	20054794	24005002	7320086	16918386	19160596	9467801	7530198	18594734	19113752	6093766	22619150	22271748
1695	3.122	331.079	w/o MS2:(3R)-4,4-dimethyl-3-[(2S,3R,4S,5S,6R)-3,4,5-trihydroxy-6-(hydroxymethyl)oxan-2-yl]oxyoxolan-2-one//allamandin	[M+H]+	175044	138295	17755	424226	39445	127830	46841	277399	263011	38354	378213	195035
1697	8.218	331.081	w/o MS2:4',5,7-trihydroxy-3,6-dimethoxyflavone	[M+H]+	521864	350158	3968.86	250245	39689	141459	3968.86	172396	488531	3968.86	524032	305258
1698	1.493	331.082	w/o MS2:(2Z)-4,6-dihydroxy-2-[(4-hydroxy-3,5-dimethoxyphenyl)methylidene]-1-benzofuran-3-one	[M+H]+	399608	355040	14618	100922	151644	184891	16117	370162	205147	12223	435570	211713
1699	8.44	331.159	w/o MS2:3-Heptanone, 7-(3,4-dihydroxyphenyl)-5-hydroxy-1-(4-hydroxyphenyl)-	[M+H]+	1933.14	1933.14	198431	19331	24257	42609	202156	1933.14	1933.14	115755	1933.14	1933.14
1701	16.1	331.175	w/o MS2:4-decyl-3-hydroxy-5-oxooxolane-2,3-dicarboxylic acid	[M+H]+	1442.4	147855	1442.4	34558	15482	16357	1442.4	70432	1442.4	1442.4	14424	99390
1703	3.617	331.188	w/o MS2:albocycline	[M+H]+	333828	150262	54337	463723	297048	333481	90772	147764	413277	5433.65	198073	321322
1704	2.67	331.191	w/o MS2:(4,7,7-trimethyl-3-bicyclo[2.2.1]heptanyl) (E)-3-(4-hydroxy-3-methoxyphenyl)prop-2-enoate	[M+H]+	129790	350325	12979	207467	238391	146941	12979	324262	286738	12979	160579	343720
1705	2.667	331.263	w/o MS2:sclareol	[M+H]+	169307	167478	2485.57	59835	59853	24856	2485.57	125712	100182	2485.57	53341	83651
1708	9.68	331.284	w/o MS2:(1S,2S,8aR)-1-[(Z)-5-hydroxy-3-methylpent-3-enyl]-2,5,5,8a-tetramethyl-3,4,4a,6,7,8-hexahydro-1H-naphthalen-2-ol	[M+H]+	115489	52016	2363	261292	144399	46816	236.334	377106	486642	12526	503759	226767
1713	11.72	332.147	w/o MS2:Deoxysappanone B 7,3'-Dimethyl Ether	[M+H]+	1427.58	1427.58	44436	14276	17058	26654	50680	1427.58	1427.58	44669	1427.58	1427.58
1714	1.535	332.206	w/o MS2:(2R,3R,4S,5S,6R)-2-[(2E)-4-ethenyl-2,5-dimethylhexa-2,5-dienoxy]-6-(hydroxymethyl)oxane-3,4,5-triol	[M+H]+	505.864	505.864	11651	505.864	505.864	505.864	17502	505.864	505.864	5059	505.864	505.864
1715	11.381	333.15	w/o MS2:cinchonine	[M+H]+	138.664	138.664	84660	1387	22967	16016	136673	138.664	138.664	95868	138.664	138.664
1719	7.465	333.152	w/o MS2:(5R)-5-hydroxy-1-(4-hydroxy-3-methoxyphenyl)decan-3-one	[M+H]+	15863	65562	78713	59008	91707	28131	75587	21960	62901	56812	29133	56024
1720	7.828	333.17	w/o MS2:Arnicolide D	[M+H]+	97535	155296	69813	165869	129476	119399	74314	123250	105779	36512	92673	210186
1727	5.644	333.203	w/o MS2:dihydroalbocycline	[M+H]+	28864	65285	113944	44054	22981	89741	216290	20993	14118	275698	23278	49205
1729	17.52	333.205	w/o MS2:5-[2-(furan-3-yl)ethyl]-8-hydroxy-5,6,8a-trimethyl-3,4,4a,6,7,8-hexahydronaphthalene-1-carboxylic acid	[M+H]+	235.019	235.019	65998	2350	5026	5386	63451	235.019	235.019	44340	235.019	235.019
1741	17.852	333.243	w/o MS2:(2E,4E)-N-[2-(4-hydroxyphenyl)ethyl]dodeca-2,4-dienamide	[M+ACN+Na]+	189355	87659	38371	11617	150537	245874	125095	295551	264653	159448	4680	7991
1744	18.111	334.311	w/o MS2:(2E,4E,12Z)-N-(2-methylpropyl)octadeca-2,4,12-trienamide	[M+H]+	6411	12384	1412	7983	15358	6321	4905	12427	5355	13416	1408	6504
1745	0.85	335.073	w/o MS2:(2S,3S)-3,5,7-trihydroxy-6-methyl-2-(3,4,5-trihydroxyphenyl)-2,3-dihydrochromen-4-one	[M+ACN+Na]+	1621	162.064	17678	6719	7475	7164	21289	162.064	8077	18377	162.064	162.064
1747	1.279	335.124	w/o MS2:5-hydroxy-2,2-dimethyl-10-(2-methylbut-3-en-2-yl)pyrano[3,2-g]chromen-8-one	[2M+H]+	11474	15233	20876	15555	23915	17048	36263	17425	12551	27146	13083	11948
1748	13.23	335.165	w/o MS2:(2E,4E,8E)-7,13-dihydroxy-4,8,12-trimethyltetradeca-2,4,8-trienoic acid	[M+H]+	9562	50817	140028	10856	43421	51552	115793	54291	13000	187390	3181	25743
1752	4.128	335.183	w/o MS2:STRYCHNINE	[M+H]+	225163	203350	8348	145616	163471	191829	9476	104416	221844	1196	213280	197086
1754	5.119	335.215	w/o MS2:(9Z,12E)-15,16-dihydroxyoctadeca-9,12-dienoic acid	[M+H]+	191884	189698	95232	186977	186891	154662	80056	387413	379937	43400	217237	206695
1755	23.26	335.219	w/o MS2:(9Z,12E)-15,16-dihydroxyoctadeca-9,12-dienoic acid	[M+H]+	147443	130497	2247.98	81099	109622	77670	2247.98	146491	81681	2247.98	72138	22480
1783	18.595	335.258	w/o MS2:Dihydroxy (3Alpha,12Alpha)Pregnan-20-One	[M+H]+	115210	1899742	110442	2368746	1085375	272601	2246269	1332170	1107482	1484402	1105862	1377875
1797	18.556	335.308	w/o MS2:arachidic acid	[M+H]+	28862	9806	10664	6670	5686	9432	15189	15406	7534	9407	1186	1315
1801	3.391	337.068	w/o MS2:cirsimaritin	[M+Na]+	4712	6052	116.032	30993	116.032	116.032	116.032	1160	9781	116.032	17851	4655
1803	0.941	337.092	w/o MS2:2-(4a,9,10a-trihydroxy-1-methyl-5,10-dioxo-3,4-dihydro-1H-benzo[g]isochromen-3-yl)acetic acid	[M+H]+	10634	14088	605.246	21886	15152	17417	605.246	6052	10051	605.246	15737	9929
1804	1.537	337.163	w/o MS2:(2R,3R,4S,5S,6R)-2-[(2E)-4-ethenyl-2,5-dimethylhexa-2,5-dienoxy]-6-(hydroxymethyl)oxane-3,4,5-triol	[M+H]+	63575	26938	91461	398592	57068	54463	103049	25015	33918	84438	30363	25173
1805	14.5	337.167	w/o MS2:Rhetsinine	[M+H]+	46735	62303	42425	79693	46605	24145	66494	54669	24478	32835	15202	26271
1807	5.778	337.176	w/o MS2:1,4a-dimethyl-9-oxo-7-propan-2-yl-3,4,10,10a-tetrahydro-2H-phenanthrene-1-carboxylic acid	[M+H]+	421.157	421.157	71681	4212	421.157	421.157	15570	421.157	421.157	36776	421.157	421.157
1825	17.063	338.26	w/o MS2:5-(1,2,4a,5-tetramethyl-7-oxo-3,4,8,8a-tetrahydro-2H-naphthalen-1-yl)-3-methylpentanoic acid	[M+H]+	22769	70335	63340	92699	65946	34159	174924	97942	46319	65828	53964	75535
1835	1.235	339.05	w/o MS2:Pinoquercetin	[M+H]+	21051	40810	45064	20762	18432	32782	28784	38305	33057	43886	29900	38989
1836	1.198	339.108	w/o MS2:(1R,3R,4S,5R)-1,3,4-trihydroxy-5-[(E)-3-(4-hydroxyphenyl)prop-2-enoyl]oxycyclohexane-1-carboxylic acid	[M+H]+	27344	18223	65703	21464	63450	33283	31787	143750	28167	16712	13256	29087
1838	16.75	339.197	w/o MS2:7-(2-hydroxypropan-2-yl)-1,4a-dimethyl-2,3,4,9,10,10a-hexahydrophenanthrene-1-carboxylic acid	[M+H]+	6003	6257	10196	333.125	12067	333.125	12865	3331	333.125	9655	333.125	333.125
1846	21.363	341.017	w/o MS2:Gossypetin	[M+H]+	386040	359712	5304	530.388	278277	380112	216780	32462	1447783	17883	417350	67110
1847	5.467	341.065	w/o MS2:2-(3-hydroxy-5-methoxyphenoxy)-6-(hydroxymethyl)oxane-3,4,5-triol//demethylsulochrin	[M+H]+	1074010	804451	165905	985060	726339	643395	519977	664924	779986	462932	863863	1310784
1851	6.897	341.102	w/o MS2:Dechlorogriseofulvin	[M+H]+	6056	605.633	605.633	605.633	605.633	605.633	605.633	605.633	13780	605.633	13509	605.633
1852	7.818	341.246	w/o MS2:bilobol	[M+H]+	11081	11494	114.451	114.451	1145	3640	114.451	11183	13337	114.451	10175	15819
1860	3.119	342.126	w/o MS2:Rhetsinine	[M+H]+	11543	22804	19391	9694	9645	13504	18187	16593	14100	17622	14734	9844
1861	4.487	343.08	w/o MS2:barceloneic acid A	[M+H]+	1282779	3006098	55231	2107708	2439403	310877	123577	3135709	2371286	50613	3199900	1910598
1865	5.388	344.102	Unknown//axillarin	[M+H]+	7713.85	7713.85	597286	77138	191271	205935	654540	7713.85	7713.85	499518	7713.85	7713.85
1866	18.885	344.278	w/o MS2:1,2-dihydroxyheptadec-16-yn-4-yl acetate	[M+H]+	122.132	122.132	9645	122.132	122.132	122.132	6435	1344	122.132	9764	122.132	1221
1867	3.92	345.06	w/o MS2:11-methyl-2,7-dimethylidene-6,12-dioxo-5,14-dioxatricyclo[9.2.1.0?,?]tetradec-1(13)-en-9-yl 2-methylprop-2-enoate// dihydroxytrimethoxyflavone	[M+H]+	112571	1220089	525116	727182	600087	142964	229231	1996478	1525498	49573	674536	842740
1875	10.84	345.095	w/o MS2:(9a-hydroxy-3,8a-dimethyl-5-methylidene-2-oxo-4,4a,6,7,8,9-hexahydrobenzo[f][1]benzofuran-8-yl) acetate	[M+H]+	388398	252729	16289.2	162892	217366	224609	16289.2	250778	297214	16289.2	627636	470423
1878	2.279	345.097	w/o MS2:santin	[M+H]+	267256	2452201	14392	782553	1316950	1229435	27286	1435279	2713390	15852	2883898	936286
1879	2.924	345.207	w/o MS2:(1R,9S,10S)-3,4-dihydroxy-11,11-dimethyl-5-(propan-2-yl)-16-oxatetracyclo[7.5.2.0?,??.0?,?]hexadeca-2(7),3,5-triene-8,15-dione	[M+H]+	28102	39173	1309.04	1309.04	19587	19794	1309.04	62366	57850	1309.04	32472	13090
1881	2.164	345.24	w/o MS2:(1R,4aS,5R,8aS)-5-(5-hydroxy-3-methylpentyl)-1,4a-dimethyl-6-methylidene-3,4,5,7,8,8a-hexahydro-2H-naphthalene-1-carboxylic acid	[M+H]+	3914.62	3914.62	81489	39146	3914.62	3914.62	99305	3914.62	3914.62	77705	3914.62	3914.62
1885	1.987	346.068	w/o MS2:Guanosine cyclic monophosphate	[M+Na]+	1535365	1683092	273105	568884	1396746	903398	596561	1704183	1787808	455290	1841237	1833071
1887	2.532	346.089	w/o MS2:(10E,15Z)-9,12,13-trihydroxyoctadeca-10,15-dienoic acid	[M+H]+	80160	187303	4170.1	41701	131134	71315	4170.1	222982	126273	4170.1	283128	152741
1890	1.405	347.076	w/o MS2:2-(3,4-dihydroxyphenyl)-5,7-dihydroxy-6,8-dimethoxychromen-4-one	[M+H]+	130376	291859	12283	122830	186449	174822	12283	299601	290005	12283	302684	299877
1893	2.014	347.129	w/o MS2:(E)-1-(2,4-dihydroxyphenyl)-3-[4-(3-methylbut-2-enoxy)phenyl]prop-2-en-1-one	[M+H]+	7672	5547	56126	24369	16949	30911	103103	7107	5574	26304	7767	1195
1895	9.665	347.258	w/o MS2:3Beta-Hydroxy-23,24-Bisnorchol-5-Enic Acid	[M+H]+	22202	12766	317190	131755	68233	116109	154602	82325	13957	466074	2462	14228
1896	8.633	348.14	w/o MS2:4,5-dihydroxy-4,5,6-trimethyl-2,8-dioxa-13-azatricyclo[8.5.1.0??,??]hexadec-10-ene-3,7-dione	[M+H]+	39353	33448	231.051	231.051	231.051	2311	231.051	20546	30067	231.051	31521	5217
1897	1.274	349.127	w/o MS2:[(4E)-7-acetyloxy-6-hydroxy-2-methyl-10-oxo-2,3,6,7,8,9-hexahydrooxecin-3-yl] (E)-but-2-enoate	[M+CH3OH+H]+	19049	16886	1005.79	111900	1005.79	1005.79	1005.79	19039	22016	1005.79	17930	10058
1898	15.314	349.237	w/o MS2:2-[4a-methyl-8-methylidene-4-(3-methylpentanoyloxy)-1,2,3,4,5,6,7,8a-octahydronaphthalen-2-yl]prop-2-enoic acid	[M+H]+	6657	12350	115.962	5962	3571	1160	115.962	25053	12639	115.962	14566	7288
1903	9.19	351.146	w/o MS2:(2R,3S,4S,5R,6S)-2-(hydroxymethyl)-6-(4-hydroxy-2-methyl-5-propan-2-ylphenoxy)oxane-3,4,5-triol	[M+H]+	2311.53	2311.53	202244	23115	76385	70714	342995	2311.53	2311.53	125211	2311.53	2311.53
1905	5.144	351.184	w/o MS2:hirsutanone	[M+H]+	44348	217624	2883.1	32753	28831	82631	2883.1	99462	195196	2883.1	189396	203403
1908	19.397	351.251	w/o MS2:1,2-dihydroxyheptadec-16-en-4-yl acetate	[M+H]+	30247	56633	206167	124500	106436	172053	40349	36614	12525	168021	23673	71115
1909	19.299	351.253	w/o MS2:(5R)-5-hydroxy-1-(4-hydroxy-3-methoxyphenyl)tetradecan-3-one	[M+H]+	256.991	9546	127592	29875	28098	14693	135636	5612	256.991	108433	256.991	2570
1910	18.097	351.337	w/o MS2:(2E,4E,12Z)-N-(2-methylpropyl)octadeca-2,4,12-trienamide	[M+ACN+Na]+	8741	6473	6906	1510	18208	1249	13147	13102	124.88	7291	1455	1270
1913	16.779	352.24	w/o MS2:4-[2-[(1R,4aS,5R,8aS)-6-hydroxy-5-(hydroxymethyl)-5,8a-dimethyl-2-methylidene-3,4,4a,6,7,8-hexahydro-1H-naphthalen-1-yl]ethyl]-2H-furan-5-one	[M+H]+	2988.78	2988.78	47459	90699	29888	40738	117680	2988.78	2988.78	117605	2988.78	2988.78
1915	0.796	353.084	w/o MS2:Griseofulvin	[M+H]+	27805	9917	29422	33756	21933	32051	30698	14809	21247	12485	24963	13236
1916	1.536	353.135	w/o MS2:5'-(furan-3-yl)-4a-hydroxy-4,7-dimethylspiro[5,6,7,8a-tetrahydro-1H-naphthalene-8,3'-oxolane]-2,2'-dione	[M+H]+	118.776	118.776	74487	1188	13413	11246	78331	118.776	118.776	58820	118.776	118.776
1917	9.199	353.142	w/o MS2:(2R,3R,4S,5S,6R)-2-[(2E)-4-ethenyl-2,5-dimethylhexa-2,5-dienoxy]-6-(hydroxymethyl)oxane-3,4,5-triol	[M+H]+	239.011	239.011	112047	239.011	4429	2390	79495	239.011	239.011	40419	239.011	239.011
1919	2.482	353.23	w/o MS2:[(1R,2S,3S,4R,4aS)-2,3-dihydroxy-3,4a,8,8-tetramethyl-4-[(E)-3-oxobut-1-enyl]-2,4,5,6,7,8a-hexahydro-1H-naphthalen-1-yl] acetate	[M+H]+	89333	173601	222949	869457	209654	147163	267457	94219	100916	143456	88654	160380
1920	17.592	353.268	Unknown/2,3-Dihydroxypropyl palmitate	[M+H]+	184350	189597	124564	16544	179577	167613	120038	224121	196378	145265	175536	1654.38
1926	9.002	353.269	w/o MS2:(Z)-9,12,13-trihydroxyoctadec-15-enoic acid	[M+H]+	213416	83761	194534	196861	102902	174451	186842	157535	198965	155413	190286	145981
1931	22.875	355.07	w/o MS2:sulochrin	[M+H]+	172176	184374	157861	491865	138791	249590	149608	121263	236426	160828	205954	107966
1934	18.763	355.092	w/o MS2:[1-hydroxy-1-(4-methoxyphenyl)propan-2-yl] 4-methoxybenzoate	[M+H]+	118140	119596	3618	43954	76606	76126	5024	103391	104765	361.754	95976	89837
1935	1.293	355.173	w/o MS2:(2R,3R,4S,5S,6R)-2-[(2E)-4-hydroxy-3,7-dimethylocta-2,6-dienoxy]-6-(hydroxymethyl)oxane-3,4,5-triol	[M+H]+	31172	16761	23674	60977	32677	29713	54144	23979	25239	24394	48459	11487
1937	7.669	355.263	w/o MS2:5-[5-hydroxy-3-(hydroxymethyl)pentyl]-8a-(hydroxymethyl)-5,6-dimethyl-3,4,4a,6,7,8-hexahydronaphthalene-1-carboxylic acid	[M+H]+	1310	17222	38113	4360	18302	23345	66383	6855	8443	41182	7309	10380
1938	8.739	355.283	w/o MS2:monolinolein	[M+H]+	24394	1129.3	1129.3	1129.3	1129.3	1129.3	1129.3	1129.3	12521	1129.3	11293	1129.3
1939	12.851	355.32	w/o MS2:O-geranylconiferyl alcohol	[M+H]+	3113.79	3113.79	68448	3113.79	31138	55050	64464	78797	65418	74023	52635	54356
1941	5.496	356.087	w/o MS2:Piplartine	[M+H]+	19825	38013	10434	31651	37770	10914	15785	82079	68212	5697	29115	48310
1942	18.611	357.108	w/o MS2:9-(2,3-dihydroxy-3-methylbutyl)-4-methoxyfuro[3,2-g]chromen-7-one	[M+H]+	52894	61899	3906.35	39063	40100	39474	3906.35	58709	57160	3906.35	46942	52820
1943	1.443	357.144	w/o MS2:Eseroline Fumarate	[M+H]+	117.107	117.107	7900	117.107	5401	3476	13004	10628	4604	6158	1171	117.107
1944	7.665	357.279	w/o MS2:Lagochilin	[M+H]+	598.128	598.128	10486	598.128	598.128	598.128	16805	598.128	598.128	5981	598.128	598.128
1945	7.349	358.105	w/o MS2:Rhetsinine	[M+H]+	10816	21329	380.775	380.775	8446	3808	380.775	25654	9695	380.775	6509	23626
1946	6.787	358.165	w/o MS2:(6aS)-1,2,10-trimethoxy-6-methyl-6-oxido-5,6,6a,7-tetrahydro-4H-dibenzo[de,g]quinoline-6-ium-9-ol	[M+H]+	117.002	3795	27093	3796	14114	7400	48477	6975	2412	14808	1170	10096
1953	5.604	359.076	Unknown//rosmarinic acid	[M+ACN+Na]+	5227156	6611578	4095080	4031852	5660486	5316658	4178153	5977164	3001244	3270204	5724010	5891222
1954	9.961	359.076	w/o MS2:1-(3,4-dihydroxyphenyl)-6,7-dihydroxy-1,2-dihydronaphthalene-2,3-dicarboxylic acid//rosmarinic acid	[M+H]+	82124	106515	1150.52	44851	11505	66987	1150.52	12762	259425	1150.52	236657	14001
1955	4.491	359.112	Unknown//retusin	[M+H]+	201343	2203244	28783	1174291	1554300	108477	15064	2086697	1523592	5009	2056323	1393483
1957	4.658	359.112	w/o MS2:5-Hydroxy-2',4',7,8-Tetramethoxyflavone	[M+H]+	2745717	2750259	100403	1649756	202130	103311	71713	1132209	1236084	57136	1799702	1120981
1958	9.971	360.083	w/o MS2:Apotoxicarol	[M+H]+	181265	56815	1856.14	18561	51262	91066	1856.14	124012	175490	1856.14	143047	115239
1962	13.161	361.09	w/o MS2:(1R,3R,4S,5R)-1,3,4-trihydroxy-5-[(E)-3-(4-hydroxyphenyl)prop-2-enoyl]oxycyclohexane-1-carboxylic acid//Trans-5-O-(4-coumaroyl)-D-quinate	[M+H]+	17258	34457	928.408	18732	22979	9284	928.408	41804	31925	928.408	33945	31757
1975	1.986	361.092	w/o MS2:3-O-acetylpadmatin	[M+H]+	1826877	2054700	431667	888275	1455678	1227072	445641	2269603	1843893	360550	1904391	1980189
1979	2.666	361.092	w/o MS2:IRIGENIN	[M+H]+	2535244	3490050	352447	1757678	2454260	2164488	483113	1804502	2864005	290441	2549576	3082226
1981	18.062	361.193	w/o MS2:Cortisone	[M+H]+	287080	135796	397181	302393	312915	291892	363950	383546	267741	357714	258467	289124
1982	16.073	362.188	w/o MS2:2-[1-hydroxy-1-(4-methoxyphenyl)propan-2-yl]oxy-6-(hydroxymethyl)oxane-3,4,5-triol	[M+H]+	120212	50787	36359	292860	19131	18298	6492	14677	27392	8002	11331	13496
1983	23.311	363.172	w/o MS2:[5-acetyloxy-3-(hydroxymethyl)-2-oxo-6-propan-2-ylcyclohex-3-en-1-yl] 3-methylpentanoate	[M+H]+	19231	26319	20547	42933	17761	42675	17684	22690	16352	10712	13759	21276
1986	8.003	363.214	w/o MS2:HYDROCORTISONE	[M+H]+	115.447	4417	11337	26217	1154	10838	9947	1218	115.447	11417	115.447	6938
1988	4.008	365.063	w/o MS2:(E)-3-[2-[(2S,3R,4S,5S,6R)-3,4,5-trihydroxy-6-(hydroxymethyl)oxan-2-yl]oxyphenyl]prop-2-enoic acid	[M+H]+	105720	29717	1094.05	83943	10941	72722	1094.05	25308	55470	1094.05	41618	37130
1989	0.775	365.104	w/o MS2:Luteolin	[M+H]+	875712	642610	30906	410418	431969	172791	34027	422397	919583	27110	693937	506807
1991	2.021	365.141	w/o MS2:Melibiose	[M+ACN+H]+	18123	5676	30538	12366	16477	32732	69789	7306	18897	26997	7540	14985
1992	1.675	365.16	w/o MS2:[(3aR,4S,6R,11aR)-6,9-dihydroxy-6,10-dimethyl-3-methylidene-2,7-dioxo-3a,4,5,8,9,11a-hexahydrocyclodeca[b]furan-4-yl] 2-methylprop-2-enoate	[M+H]+	1350.09	1350.09	20466	1350.09	1350.09	1350.09	23935	1350.09	1350.09	13501	1350.09	1350.09
1995	9.247	365.268	w/o MS2:[12-hydroxy-6-(hydroxymethyl)-10-methyl-2-(4-methylpent-3-enyl)dodeca-2,6,10-trienyl] acetate	[M+H]+	11109	22090	472064	103130	142103	204046	519250	49853	22155	355331	12312	55005
2001	2.284	367.079	w/o MS2:1-(4-hydroxyphenyl)-3-[(2R,3R,4S,5S,6R)-3,4,5-trihydroxy-6-(hydroxymethyl)oxan-2-yl]oxypropan-1-one	[M+Na]+	49025	10266	959.466	87423	12106	10980	959.466	18069	49313	959.466	35160	9595
2003	0.886	367.107	w/o MS2:4-[(Z)-4-(4-hydroxy-3-methoxyphenyl)-2,3-dimethylbut-3-enyl]-2-methoxyphenol	[M+H]+	55177	43112	49381	72756	69952	49358	48497	23476	59876	32798	39533	26338
2004	1.019	367.114	w/o MS2:Kanakugiol	[M+H]+	12448	51931	15854	12492	22335	18854	19228	9869	39294	45302	33257	15769
2006	1.954	367.181	w/o MS2:6a,7,8-trihydroxy-3-methyl-3,4,5,6,7,12a-hexahydro-2H-benzo[a]anthracene-1,12-dione	[M+H]+	154386	116465	103555	29474	195162	275274	323038	146845	146729	178193	117717	128356
2007	14.999	367.228	w/o MS2:1,2-dihydroxyheptadec-16-en-4-yl acetate	[M+H]+	4867	4460	121.179	1212	3131	4758	121.179	9845	7070	121.179	5980	8806
2008	15.762	367.26	w/o MS2:icos-19-ene-1,2,4-triol	[M+H]+	1002.58	1002.58	19820	1002.58	1002.58	1002.58	20814	1002.58	1002.58	10026	1002.58	1002.58
2012	1.028	369.139	w/o MS2:3-(3,4-dimethoxyphenyl)-1-(2-hydroxy-4,6-dimethoxyphenyl)propan-1-one	[M+H]+	97673	145741	96134	118100	78797	143060	63150	82959	102571	134420	139883	94600
2013	0.897	369.145	w/o MS2:(4,7,7-trimethyl-3-bicyclo[2.2.1]heptanyl) (E)-3-(4-hydroxy-3-methoxyphenyl)prop-2-enoate	[M+H]+	19130	11478	619.317	10109	6193	10375	619.317	26365	29091	619.317	30178	12194
2014	5.139	369.158	w/o MS2:(1R,2E,8S,10R,11S)-10,11-dihydroxy-6-(methoxymethyl)-1,10-dimethyl-5-oxo-4,14-dioxatricyclo[9.2.1.0?,?]tetradeca-2,6-dien-8-yl acetate	[M+H]+	29397	78870	120.514	5643	19258	63640	1205	33696	29406	120.514	42790	51269
2015	2.482	369.195	w/o MS2:(2S,3S,4S,8R,9S,13R,14R,15S,16R)-3,4,8,14,15-pentahydroxy-2,13,16-trimethyl-6-methylidene-10-oxatetracyclo[7.6.1.0?,?.0??,??]hexadecan-11-one	[M+H]+	17921	57004	84094	41333	53310	52136	142112	39296	70430	47176	18816	19590
2017	16.387	369.242	w/o MS2:3Beta-Hydroxy-23,24-Bisnorchol-5-Enic Acid	[M+H]+	10404	38066	2715	31253	24130	13629	47370	40327	8232	64077	7559	16759
2020	7.657	369.278	w/o MS2:3-[(Z)-heptadec-10-enyl]benzene-1,2-diol	[M+H]+	26413	19032	99702	20710	24756	17077	101822	17660	31913	70337	55914	28225
2022	8.77	371.077	w/o MS2:asterric acid	[M+H]+	11147	11424	1114.7	1114.7	1114.7	1114.7	1114.7	19623	18010	1114.7	21044	19755
2024	25.829	371.124	w/o MS2:Arnicolide D	[M+H]+	232.985	2330	31599	27518	36228	28641	58736	59228	33398	31279	20724	63726
2025	1.835	371.137	w/o MS2:onopordopicrin	[M+H]+	115.963	2311	16903	115.963	5891	1328	9353	115.963	1160	9715	115.963	115.963
2026	1.246	371.152	w/o MS2:(2R,3R,4S,5S,6R)-2-[(2E)-4-hydroxy-3,7-dimethylocta-2,6-dienoxy]-6-(hydroxymethyl)oxane-3,4,5-triol	[M+H]+	11745	48701	9714	47139	26712	48901	8727	39931	14884	3832	10280	28540
2028	1.029	371.157	w/o MS2:3-methyl-8,10,20,22-tetraoxa-3-azapentacyclo[15.7.0.0?,??.0?,??.0??,??]tetracosa-1(17),5,7(11),12,18,23-hexaen-14-one	[M+CH3OH+H]+	26501	14262	10958	21099	60186	29337	6525	97666	88970	1226	31538	26951
2029	18.691	371.22	w/o MS2:2-[4a-methyl-8-methylidene-4-(3-methylpentanoyloxy)-1,2,3,4,5,6,7,8a-octahydronaphthalen-2-yl]prop-2-enoic acid	[M+CH3OH+H]+	2559.74	2559.74	31601	2559.74	2559.74	2559.74	64273	2559.74	2559.74	25597	2559.74	2559.74
2032	11.723	372.243	w/o MS2:(E)-3-(4-acetyloxy-2,3-dihydroxy-2,5,5,8a-tetramethyl-3,4,4a,6,7,8-hexahydro-1H-naphthalen-1-yl)prop-2-enoic acid	[M+2H]2+	1845.07	31241	258377	70622	150227	157105	277960	18451	1845.07	452468	1845.07	23772
2033	3.333	373.091	w/o MS2:MITOMYCIN C	[M+H]+	108706	63842	2463	36480	52746	86914	1561	76199	59114	156.062	34725	122947
2035	17.635	373.144	w/o MS2:[(1S,3aR,5R,5aR,8aR,9S,9aR)-1,5,8a-trimethyl-2,8-dioxo-3a,4,5,5a,9,9a-hexahydro-1H-azuleno[6,5-b]furan-9-yl] 2-methylpropanoate	[M+H]+	574.752	574.752	31020	8347	574.752	574.752	25692	574.752	574.752	5748	574.752	574.752
2036	1.019	373.178	w/o MS2:4-[2-[(1R,4aS,5R,8aS)-6-hydroxy-5-(hydroxymethyl)-5,8a-dimethyl-2-methylidene-3,4,4a,6,7,8-hexahydro-1H-naphthalen-1-yl]ethyl]-2H-furan-5-one	[M+H]+	12004	13725	626.528	12172	626.528	626.528	626.528	9009	8370	626.528	8862	6265
2037	1.178	373.222	w/o MS2:7-hydroxy-1,4a-dimethyl-9-oxo-7-propan-2-yl-2,3,4,4b,5,6,10,10a-octahydrophenanthrene-1-carboxylic acid	[M+H]+	83218	48299	2450.56	24506	31501	38567	2450.56	89705	81112	2450.56	72837	56142
2038	19.413	373.235	w/o MS2:(5R)-5-hydroxy-1-(4-hydroxy-3-methoxyphenyl)tetradecan-3-one	[M+Na]+	752.126	19286	413604	130545	83832	138379	231959	7521	752.126	190712	752.126	752.126
2039	18.49	373.237	w/o MS2:11A-Acetoxyprogesterone	[M+H]+	927.188	927.188	48827	15887	13047	9272	44038	927.188	927.188	27416	927.188	927.188
2042	9.449	374.122	w/o MS2:7,9-dimethoxy-6-(4-methoxyphenyl)-[1,3]dioxolo[4,5-g]chromen-8-one	[M+H]+	56290	38600	1533.07	15331	27808	20623	1533.07	58502	114328	1533.07	37776	56595
2043	22.458	374.288	w/o MS2:Lagochilin	[M+H]+	33587	41879	115239	113156	213354	53328	319228	154779	26566	117223	111418	58357
2045	2.93	375.107	Unknown//Chrysosplenetin	[M+H]+	4131451	3541026	250471	1834116	2343144	2019554	195191	3093378	3092674	47912	4254973	4544561
2048	3.129	375.107	w/o MS2:Myricetin 3,7,3',4'-tetramethyl ether	[M+H]+	6547888	7091916	734113	3950423	5196527	5044590	921332	7467218	6875306	549746	7463562	7492192
2049	1.55	375.109	w/o MS2:skullcapflavone II	[M+Na]+	20811	4999	22119	6795	1837	18248	11398	13348	18209	56470	37378	39777
2050	18.596	375.118	w/o MS2:skullcapflavone II	[M+H]+	61756	76278	3645	73584	88015	83087	7280	151154	74586	4728	55997	133072
2051	18.69	375.208	w/o MS2:[(1R,2S,3S,4R,4aS)-2,3-dihydroxy-3,4a,8,8-tetramethyl-4-[(E)-3-oxobut-1-enyl]-2,4,5,6,7,8a-hexahydro-1H-naphthalen-1-yl] acetate	[M+H]+	34463	19051	48599	36278	38966	19505	42137	61327	19307	40007	28534	37818
2054	11.692	375.25	w/o MS2:2-hydroxy-4-methoxy-3,5-bis(3-methylbut-2-enyl)-6-pentylbenzoic acid	[M+H]+	29343	75994	27647	2764.73	30756	30795	70536	37603	35305	36658	58187	54013
2058	18.101	377.321	w/o MS2:Lithocholic Acid	[M+ACN+H]+	13175	16425	16031	1507	23224	16999	12989	28514	22798	11467	13957	20837
2059	2.692	379.173	w/o MS2:6-formyl-5-hydroxy-10-(hydroxymethyl)-3-methylidene-2-oxo-2H,3H,3aH,4H,5H,8H,9H,11aH-cyclodeca[b]furan-4-yl 2-methylbutanoate	[M+H]+	1071.99	1071.99	10720	148499	16375	30812	107994	1071.99	1071.99	29685	1071.99	1071.99
2061	0.939	381.079	w/o MS2:?-Gentiobiose	[M+H]+	1167402	1327265	1684146	756146	1172919	1709176	1079314	1767532	1397908	864119	1414388	1261389
2062	1.01	381.132	w/o MS2:(E)-3-(3,4-dimethoxyphenyl)-1-(2,4,6-trimethoxyphenyl)prop-2-en-1-one	[M+H]+	16423	33464	6597	17930	33745	12412	7168	34670	16423	659.653	18426	17585
2063	0.883	381.133	w/o MS2:ROBUSTIC ACID	[M+H]+	105865	221884	96148	197475	258568	160073	62904	155753	94651	53285	173676	198475
2067	0.898	382.996	w/o MS2:USNIC ACID	[M+H]+	84653	71294	37317	73765	80560	75027	41702	70337	75855	33267	74090	58894
2068	2.663	383.074	w/o MS2:rosmarinic acid	[M+Na]+	66222	86323	3783.57	1021491	82431	37836	3783.57	46405	75328	3783.57	80311	62217
2071	23.309	383.141	w/o MS2:[(3aR,4R,5R,6E,9Z,11aR)-4-hydroxy-6,10-dimethyl-3-methylidene-2,8-dioxo-4,5,11,11a-tetrahydro-3aH-cyclodeca[b]furan-5-yl] (Z)-2-methylbut-2-enoate	[M+H]+	610430	438334	291203	799657	287741	371818	287384	428234	59679	162212	302141	167422
2072	2.019	383.151	w/o MS2:methyl (1S,12S,13E)-13-ethylidene-18-(hydroxymethyl)-4-methoxy-8,15-diazapentacyclo[10.5.1.0?,?.0?,?.0??,??]octadeca-2,4,6,8-tetraene-18-carboxylate	[M+H]+	89431	113054	60178	56211	37289	193880	259593	108535	117818	176815	84602	53946
2074	1.294	383.17	w/o MS2:Isolaserpitin	[M+H]+	10312	19766	19221	5986	20623	30784	15522	24539	17944	14236	9858	13577
2077	0.883	385.126	w/o MS2:[(3aS,4S,5S,6E,10Z,11aR)-6-formyl-5-hydroxy-10-(hydroxymethyl)-3-methylidene-2-oxo-3a,4,5,8,9,11a-hexahydrocyclodeca[b]furan-4-yl] 2-methylprop-2-enoate	[M+H]+	161358	277787	720642	298779	294899	319104	421441	241420	170424	403935	242037	203844
2078	0.992	385.126	w/o MS2:[(2S,3R,4S,5S,6R)-3,4,5-trihydroxy-6-(hydroxymethyl)oxan-2-yl] (2E,6E)-8-hydroxy-2,6-dimethylocta-2,6-dienoate	[M+H]+	22902	110647	204483	57846	45819	151910	341550	33939	83814	68972	28302	31283
2079	17.628	385.144	w/o MS2:aucubin	[M+H]+	502.711	502.711	27541	5027	502.711	502.711	27809	502.711	502.711	5704	502.711	502.711
2080	2.027	385.152	w/o MS2:(2R,3S,4S,5R,6S)-2-(hydroxymethyl)-6-(3,4,5-trimethoxyphenoxy)oxane-3,4,5-triol	[M+H]+	116.031	116.031	35617	3615	20158	5608	23044	1160	2302	21331	116.031	116.031
2081	17.624	386.151	w/o MS2:methyl chlorogenate	[M+H]+	809.813	809.813	49625	8098	809.813	809.813	17124	809.813	809.813	8909	809.813	809.813
2082	8.617	387.123	w/o MS2:onopordopicrin	[M+H]+	14561	14573	122.657	122.657	122.657	1227	122.657	8451	18873	122.657	9674	12406
2084	0.995	387.141	w/o MS2:[(3aR,4S,6R,11aR)-6,9-dihydroxy-6,10-dimethyl-3-methylidene-2,7-dioxo-3a,4,5,8,9,11a-hexahydrocyclodeca[b]furan-4-yl] 2-methylprop-2-enoate	[M+H]+	139756	149844	170074	69694	227906	134516	107914	116826	63577	87093	115554	110891
2086	14.95	387.158	w/o MS2:4-benzoyl-9,13,13-trimethyl-8-oxatetracyclo[7.4.1.0?,?.0??,??]tetradeca-2,4,6-triene-3,5-diol	[M+H]+	2006	21393	1995	21865	10826	10020	9962	18567	4183	4266	199.482	6215
2087	17.628	387.159	Unknown//Gibberellin A44 diacid	[M+H]+	132.189	132.189	47392	3693	9917	1322	58996	132.189	132.189	16275	132.189	132.189
2088	17.622	387.252	w/o MS2:2-[5-[2-[2-[5-(2-hydroxypropyl)oxolan-2-yl]propanoyloxy]propyl]oxolan-2-yl]propanoic acid	[M+H]+	59134	58869	36922	66156	54537	29435	35679	73315	42398	43038	31701	61149
2091	5.605	389.123	w/o MS2:5-Demethylnobiletin	[M+H]+	70252	373802	133709	346591	431722	418694	272852	278229	232205	128448	446014	348941
2092	18.602	389.134	w/o MS2:berberine chloride	[M+CH3OH+H]+	365996	395312	115723	292940	284231	281726	117174	381991	366821	105909	348834	360974
2095	1.002	389.154	w/o MS2:4-acetyloxy-8-(3-oxo-2-pent-2-enylcyclopenten-1-yl)octanoic acid	[M+H]+	13519	28565	45322	16863	17028	11480	31712	25621	14208	12310	17301	46347
2096	17.621	389.174	w/o MS2:4-acetyloxy-8-(3-oxo-2-pent-2-enylcyclopenten-1-yl)octanoic acid	[M+H]+	220.139	220.139	42926	2201	3769	220.139	60168	220.139	220.139	11217	220.139	220.139
2097	5.608	390.125	w/o MS2:(2S,3S,4S,5R,6R)-6-(3-benzoyloxy-2-hydroxypropoxy)-3,4,5-trihydroxyoxane-2-carboxylic acid	[M+H]+	14471	20707	9689	26995	8100	14401	25631	28427	54785	3469	45749	11298
2098	18.765	391.113	w/o MS2:Curcumin	[M+H]+	2653	4976	138.404	138.404	138.404	138.404	138.404	15898	1384	138.404	4104	5444
2099	11.746	391.217	w/o MS2:Ilicicolin A	[M+H]+	1277.59	1277.59	20236	1277.59	1277.59	1277.59	12776	1277.59	1277.59	14208	1277.59	1277.59
2101	6.612	391.245	w/o MS2:DIGOXIGENIN	[M+H]+	1266	3726	2383	37853	12126	3771	6939	7625	1163	1325	5350	10880
2106	21.143	392.278	w/o MS2:2-hydroxy-4-methoxy-3,5-bis(3-methylbut-2-enyl)-6-pentylbenzoic acid	[M+H]+	1687.17	1687.17	53677	30761	16872	20850	55693	1687.17	1687.17	88527	1687.17	1687.17
2109	17.957	393.298	w/o MS2:CHENODIOL	[M+H]+	404015	342542	86716	355820	137224	176253	117216	294398	309308	56259	301543	128791
2110	13.035	393.351	w/o MS2:monolinolein	[M+H]+	39947	78537	99902	33226	38286	54849	70874	51297	13091	92365	31437	31924
2111	1.834	394.207	w/o MS2:8-hydroxy-2,7,7,11,15-pentamethyl-5,12,16-trioxapentacyclo[9.8.0.0?,?.0?,?.0??,??]nonadec-13(18)-ene-3,17-dione	[M+H]+	28157	18507	43727	237.908	26909	26931	74476	9437	7547	65959	5927	2379
2113	2.942	395.074	w/o MS2:(Z)-3-[4-methoxy-2-[(2S,3R,4S,5S,6R)-3,4,5-trihydroxy-6-(hydroxymethyl)oxan-2-yl]oxyphenyl]prop-2-enoic acid	[M+H]+	37290	24492	1933.04	301861	19330	48440	1933.04	39863	24085	1933.04	42932	28900
2116	1.114	395.191	w/o MS2:Deguelin(-)	[M+H]+	34024	15510	500.339	18442	17956	9446	500.339	16211	5003	500.339	11201	11624
2117	15.197	395.366	w/o MS2:CHOLESTANE	[M+H]+	62821	162303	4296.53	46462	80320	42965	4296.53	104096	64387	4296.53	51700	92601
2120	9.952	396.081	w/o MS2:(2S,3S)-6'-methyl-3-phenylspiro[oxirane-2,7'-quinazolino[3,2-a][1,4]benzodiazepine]-5',13'-dione	[M+H]+	99410	23154	2315.41	92209	49062	80367	2315.41	109396	111343	2315.41	129854	105773
2122	4.488	397.062	w/o MS2:Diffractaic Acid	[M+H]+	7719	27738	208.033	2080	21738	11780	208.033	25562	31432	208.033	20007	13679
2126	2.93	397.089	w/o MS2:skullcapflavone II	[M+Na]+	366489	183336	13048	2362821	368007	210807	13048	165102	215217	13048	344815	130480
2127	1.294	397.183	w/o MS2:2-[2-[(Z)-pent-2-enyl]-3-[3,4,5-trihydroxy-6-(hydroxymethyl)oxan-2-yl]oxycyclopentyl]acetic acid	[M+H]+	96378	57771	65480	239705	82802	72227	115518	80518	103450	98472	151722	70436
2128	17.573	397.221	w/o MS2:2,4-dihydroxy-5-methoxy-1'',6'',8''-trimethyldispiro[bis(oxolane)-3,2':5',7''-[3]oxatricyclo[6.3.1.0?,??]dodecane]-2''-one	[M+H]+	49675	34865	20860	48957	28504	22682	30876	31247	44722	21619	32272	47719
2131	16.231	397.382	w/o MS2:4-[2-(2,6-dimethoxy-4-prop-2-enylphenoxy)-1-hydroxypropyl]-2-methoxyphenol	[M+H]+	77581	62882	41301	51810	44370	77152	23759	60718	81603	42427	72990	69073
2132	0.916	399.048	w/o MS2:rosmarinic acid	[M+CH3OH+H]+	28469	123812	49585	66952	77565	66525	51357	120885	27359	42761	40252	113764
2134	10.613	399.106	w/o MS2:(2R,3R,4S,5S,6R)-2-[3-hydroxy-2-(4-hydroxy-3-methoxyphenyl)propoxy]-6-(hydroxymethyl)oxane-3,4,5-triol	[M+H]+	18153	1634.92	1634.92	1634.92	1634.92	1634.92	1634.92	1634.92	22162	1634.92	16349	1634.92
2135	1.796	399.163	w/o MS2:2-[4-hydroxy-2-[(2S,3R,4S,5S,6R)-3,4,5-trihydroxy-6-(hydroxymethyl)oxan-2-yl]oxyphenyl]acetonitrile	[M+H]+	164023	84510	46673	365813	97389	87483	111419	58182	64200	23468	60408	75983
2140	2.088	401.178	w/o MS2:3,8-dihydroxy-7,14-dimethoxy-17-methyl-12,16,21-trioxapentacyclo[15.3.1.0?,??.0?,??.0?,??]henicosa-2,4(13),6,8,10,14-hexaen-5-one	[M+H]+	18217	19679	195849	148684	18438	68791	68175	7223	21905	166090	5281	11365
2142	16.646	401.224	w/o MS2:5-[(4S,8aS)-4-acetyloxy-2,5,5,8a-tetramethyl-3-oxo-4a,6,7,8-tetrahydro-4H-naphthalen-1-yl]-3-methylpentanoic acid	[M+H]+	130.395	130.395	11210	1304	130.395	130.395	18394	18477	130.395	7471	130.395	2346
2144	10.622	401.29	w/o MS2:5-[5-(acetyloxymethyl)-1,2,4a-trimethyl-7-oxo-3,4,8,8a-tetrahydro-2H-naphthalen-1-yl]-3-methylpentanoic acid	[M+H]+	435.263	21741	435.263	4353	13896	23518	435.263	72473	16039	435.263	33199	63012
2145	21.922	401.346	w/o MS2:7-Oxocholesterol	[M+H]+	116.936	116.936	20053	16201	18131	6767	35045	1175	116.936	17244	116.936	1169
2148	18.042	402.261	w/o MS2:5-[(Z)-12-(3,5-dihydroxyphenyl)dodec-8-enyl]benzene-1,3-diol	[M+ACN+H]+	14683	1533	10875	128.019	6602	1280	4687	1292	2184	15019	128.019	128.019
2151	14.944	403.19	w/o MS2:2-[(2E)-3,7-dimethylocta-2,6-dienyl]-3-methoxy-5-(2-phenylethyl)phenol	[M+H]+	22856	16235	31029	60105	17906	27279	8812	29099	12205	31946	14029	13827
2153	18.027	405.129	w/o MS2:diacetoxyscirpenol	[M+H]+	224493	188725	32386	162969	147519	136678	32781	168738	190545	24498	175683	158720
2159	17.593	405.263	w/o MS2:Lovastatin	[M+H]+	100317	97264	66163	4122	94842	89070	62956	119452	105477	80145	41220	4122
2160	7.983	406.071	w/o MS2:Bicuculline (+)	[M+H]+	1004.53	1004.53	18706	1004.53	10045	20640	76779	1004.53	1004.53	32395	1004.53	1004.53
2163	7.481	406.18	w/o MS2:[(9R,10R)-10-acetyloxy-8,8-dimethyl-2-oxo-9,10-dihydropyrano[2,3-f]chromen-9-yl] 2-methylbutanoate	[M+H]+	24525	32852	23596	14616	19655	19044	17765	33000	12896	37990	18172	19324
2164	0.767	407.103	w/o MS2:(1R,2E,8S,10R,11S)-10,11-dihydroxy-6-(methoxymethyl)-1,10-dimethyl-5-oxo-4,14-dioxatricyclo[9.2.1.0?,?]tetradeca-2,6-dien-8-yl acetate	[M+H]+	30129	42166	41713	34388	25018	21419	25021	38548	22131	33616	17068	27068
2165	7.227	407.33	w/o MS2:Methyl Deoxycholate	[M+H]+	712.623	712.623	15162	712.623	712.623	712.623	20173	712.623	712.623	7126	712.623	712.623
2170	11.737	409.188	w/o MS2:eudesmin	[M+H]+	1608.34	1608.34	51461	16083	35875	36778	35315	1608.34	1608.34	33251	1608.34	1608.34
2173	9.146	409.346	w/o MS2:CHOLESTEROL	[M+H]+	100983	178031	125143	71668	80526	147751	170805	154409	127697	146377	87416	87642
2176	0.772	411.152	w/o MS2:(4E,8E)-10-(4-hydroxy-6-methoxy-7-methyl-3-oxo-1H-2-benzofuran-5-yl)-4,8-dimethyldeca-4,8-dienoic acid	[M+H]+	33306	22270	5135	513.537	13381	11687	6008	14581	22813	513.537	10436	14831
2177	1.006	411.157	Unknown//Meprednisone	[M+Na]+	252139	164773	4914	132459	33222	37035	7522	85916	159237	1143	130852	202816
2179	13.229	411.203	w/o MS2:[5-ethenyl-3-hydroxy-4-(3-hydroxyprop-1-en-2-yl)-2-(3-methoxy-3-oxoprop-1-en-2-yl)-5-methylcyclohexyl] 3,4-dihydroxy-2-methylidenebutanoate	[M+H]+	1226.48	1226.48	12265	1226.48	1226.48	1226.48	19388	1226.48	1226.48	12292	1226.48	1226.48
2180	13.256	411.286	w/o MS2:11A-Acetoxyprogesterone	[M+H]+	3850	41058	11219	21574	11810	54206	35232	32742	7669	5809	32229	69613
2185	7.661	411.325	w/o MS2:CHOLESTANE	[M+H]+	364.173	364.173	28600	364.173	3642	6905	23374	364.173	364.173	18013	364.173	364.173
2194	3.123	413.061	w/o MS2:skullcapflavone II	[M+H]+	16093	35410	1609.27	100326	49036	45528	1609.27	23464	27898	1609.27	26097	66713
2195	0.878	413.12	w/o MS2:populin	[M+CH3OH+H]+	19392	21451	323.855	3686	11504	3239	323.855	24130	19938	323.855	13983	24693
2196	1.016	413.152	w/o MS2:2-[2-[(Z)-pent-2-enyl]-3-[3,4,5-trihydroxy-6-(hydroxymethyl)oxan-2-yl]oxycyclopentyl]acetic acid	[M+CH3OH+H]+	11019	1412	124.848	124.848	124.848	1248	124.848	1764	6138	124.848	3087	124.848
2198	17.905	413.266	w/o MS2:5-[(Z)-14-(3,5-dihydroxyphenyl)tetradec-10-enyl]benzene-1,3-diol	[M+H]+	792847	639185	665227	3810	506738	1309782	898568	1509421	1815185	830865	12425	611780
2200	5.873	415.102	w/o MS2:(-)-Riboflavin	[M+H]+	8913	7946	130.898	130.898	130.898	1309	130.898	12887	16349	130.898	16206	2546
2204	1.832	415.137	w/o MS2:[(5R,6S,7S,8aR)-8a-ethenyl-5-hydroxy-6-(3-methoxy-3-oxoprop-1-en-2-yl)-4-methylidene-3-oxo-1,4a,5,6,7,8-hexahydroisochromen-7-yl] 2-(hydroxymethyl)prop-2-enoate	[M+H]+	22928	85983	139116	33487	104090	44813	105166	56537	37064	145597	16877	44837
2206	1.124	415.161	w/o MS2:3-oxo-3-[[(2R,3S,4S,5R,6S)-3,4,5-trihydroxy-6-(4-hydroxy-5-methyl-2-propan-2-ylphenoxy)oxan-2-yl]methoxy]propanoic acid	[M+H]+	84361	40650	164246	70185	94194	29398	92622	45291	18482	125118	67812	14660
2208	17.054	415.298	w/o MS2:Alpha-Hydroxydeoxycholic Acid	[M+H]+	114.365	114.365	12624	114.365	1144	114.365	11604	114.365	114.365	6290	114.365	114.365
2210	2.115	417.15	w/o MS2:[3-hydroxy-1-(4-methoxy-7-oxofuro[3,2-g]chromen-9-yl)oxy-3-methylbutan-2-yl] (E)-2-methylbut-2-enoate	[M+H]+	1646.52	1646.52	39162	1646.52	1646.52	1646.52	40727	1646.52	1646.52	16465	1646.52	1646.52
2212	14.939	417.176	w/o MS2:(2R,3S,4S,5R,6R)-5-[(2S,3R,4R)-3,4-dihydroxy-4-(hydroxymethyl)oxolan-2-yl]oxy-2-(hydroxymethyl)-6-(2-phenylethoxy)oxane-3,4-diol	[M+H]+	10445	9695	5336	14858	8803	12792	13729	14000	6252	7588	8155	8736
2213	17.624	417.191	w/o MS2:methyl (1R,4aS,9S,10S)-10-acetyloxy-5,9-dihydroxy-1,4a-dimethyl-2-oxo-7-propan-2-yl-10,10a-dihydro-9H-phenanthrene-1-carboxylate	[M+CH3OH+H]+	447.53	447.53	5773	14522	4475	447.53	33139	447.53	447.53	30778	447.53	447.53
2214	18.062	417.255	w/o MS2:cnicin	[M+H]+	63822	58751	93638	39117	70772	69679	84386	106949	62126	88457	29818	79652
2218	1.287	419.191	w/o MS2:(E)-3-(4-methoxyphenyl)-1-[2,4,6-trimethoxy-3-(3-methylbut-2-enyl)phenyl]prop-2-en-1-one	[M+Na]+	167300	162668	70102	41418	124566	124376	17749	81839	166215	47877	159760	140975
2219	14.93	419.221	w/o MS2:5-(4-acetyloxy-3-hydroxy-2,5,5,8a-tetramethyl-3,4,4a,6,7,8-hexahydronaphthalen-1-yl)-3-methylpentanoic acid	[M+H]+	74091	27865	32495	46859	93282	44209	53899	27605	33158	53595	12227	25087
2221	10.168	419.24	w/o MS2:methyl (4R,8aS)-1-hydroxy-2-(hydroxymethyl)-5,5,8a-trimethyl-4-[(2E,4E,6E)-octa-2,4,6-trienoyl]oxy-4a,6,7,8-tetrahydro-4H-naphthalene-1-carboxylate	[M+H]+	11193	51591	592.788	10751	5928	7464	592.788	19355	41107	592.788	26155	29277
2226	1.55	422.244	w/o MS2:3-[5-hydroxy-7-methoxy-2,3-dimethyl-6-(3-methylbut-2-enyl)-4-oxo-2,3-dihydrochromen-8-yl]hexanoic acid	[M+H]+	2673.73	2673.73	46146	26737	2673.73	2673.73	107816	2673.73	2673.73	77499	2673.73	2673.73
2227	0.769	423.08	w/o MS2:5-hydroxy-6,8-dimethoxy-7-[(2S,3R,4S,5S,6R)-3,4,5-trihydroxy-6-(hydroxymethyl)oxan-2-yl]oxychromen-2-one	[M+H]+	173.025	15489	1730	13654	10736	8372	173.025	22341	19214	3311	11336	14904
2230	1.679	423.163	w/o MS2:4-hydroxy-9-(4-hydroxy-3,5-dimethoxyphenyl)-5a,6,8a,9-tetrahydro-5H-[2]benzofuro[5,6-f][1,3]benzodioxol-8-one	[M+H]+	152151	140398	72185	2344254	271483	374337	390851	132717	157837	152032	172250	82699
2234	19.388	423.274	w/o MS2:7-[2,6-dimethyl-8-(2-methylbutanoyloxy)-1,2,6,7,8,8a-hexahydronaphthalen-1-yl]-3,5-dihydroxyheptanoic acid	[M+H]+	111991	86528	276527	191575	89701	172864	281664	149284	121294	184818	112704	134686
2236	1.371	424.208	w/o MS2:(2R,3S,4aS,7R,8R,8aS)-2,3,4'-trihydroxy-4,4,7,8a-tetramethylspiro[2,3,4a,5,6,7-hexahydro-1H-naphthalene-8,2'-7,8-dihydro-3H-furo[2,3-e]isoindole]-6'-one	[M+H]+	4081.53	4081.53	68408	4081.53	4081.53	4081.53	56928	4081.53	4081.53	40815	4081.53	4081.53
2237	2.162	425.178	w/o MS2:[(2S,3R,4S,5S,6R)-3,4,5-trihydroxy-6-(hydroxymethyl)oxan-2-yl] (3aS,6Z,10E,11aR)-10-methyl-3-methylidene-2-oxo-3a,4,5,8,9,11a-hexahydrocyclodeca[b]furan-6-carboxylate	[M+H]+	114.605	1178	118714	190508	12737	16261	19968	1146	114.605	228074	114.605	114.605
2238	9.588	425.268	w/o MS2:terpestacin	[M+H]+	25278	99955	9505	195.629	46749	78715	1956	200340	108843	8285	121361	139024
2240	1.13	426.249	w/o MS2:[6,10a-dihydroxy-4-(hydroxymethyl)-4,7,11b-trimethyl-9-oxo-1,2,3,4a,5,6,6a,7,11,11a-decahydronaphtho[2,1-f][1]benzofuran-5-yl] acetate	[M+H]+	20071	121.232	7155	1212	10396	6193	7265	121.232	9239	121.232	7680	121.232
2241	18.113	427.111	w/o MS2:2-[(8S,9R)-9-acetyloxy-2-oxo-8,9-dihydrofuro[2,3-h]chromen-8-yl]propan-2-yl 3-methylbutanoate	[M+H]+	48813	21323	782.554	19253	15345	9346	782.554	21805	29696	782.554	13351	7826
2242	0.889	427.138	w/o MS2:6-Hydroxysumatrol	[M+CH3OH+H]+	970488	1089799	804038	974073	946785	918847	730880	1030860	924892	617819	868416	987060
2244	0.798	427.172	w/o MS2:[(6E,10Z)-10-(acetyloxymethyl)-6-formyl-3-methylidene-2-oxo-3a,4,5,8,9,11a-hexahydrocyclodeca[b]furan-4-yl] 2-methylbutanoate	[M+H]+	415.796	415.796	34306	4158	415.796	415.796	26178	415.796	415.796	21909	415.796	415.796
2245	0.887	427.186	w/o MS2:3-[(2R,3S)-5-hydroxy-2,3,8,8-tetramethyl-4-oxo-2,3-dihydropyrano[2,3-h]chromen-6-yl]hexanoic acid	[M+H]+	11510	21057	8791	18990	14338	17060	2142	15556	9828	1362	3235	7109
2246	7.543	427.281	w/o MS2:(2E,6E,10E)-13-[(2R)-6-hydroxy-2,8-dimethyl-3,4-dihydrochromen-2-yl]-2,6,10-trimethyltrideca-2,6,10-trienoic acid	[M+H]+	42549	105727	4391	177517	65122	120573	14388	106824	43870	439.148	64732	186455
2252	25.259	429.088	w/o MS2:populin	[M+H]+	443.739	8483	11733	443.739	443.739	22865	4437	443.739	443.739	17606	443.739	9484
2253	0.998	429.143	w/o MS2:Shanzhiside methyl ester	[M+H]+	23448	51157	13568	11863	15666	35082	23910	61501	17723	10590	25754	10050
2255	1.41	429.175	w/o MS2:(2R,3R,4R,5R,6S)-2-[[(2R,3S,4S,5R,6S)-6-(4-ethenylphenoxy)-3,4,5-trihydroxyoxan-2-yl]methoxy]-6-methyloxane-3,4,5-triol	[M+H]+	67254	198589	279001	54639	108281	233682	166076	117918	23583	161736	35911	120950
2256	17.047	429.313	w/o MS2:5-[1,2,4a-trimethyl-5-(3-methylbutanoyloxymethyl)-2,3,4,7,8,8a-hexahydronaphthalen-1-yl]-3-methylpentanoic acid	[M+H]+	463.255	463.255	13337	463.255	8397	12668	36280	4633	463.255	21496	463.255	463.255
2258	20.142	429.334	w/o MS2:(1S,2R,5R,6R,10R,13S,15S)-5-[(2R,3E,5R)-5,6-dimethylhept-3-en-2-yl]-6,10-dimethyl-16,17-dioxapentacyclo[13.2.2.0?,?.0?,?.0??,??]nonadec-18-en-13-ol	[M+H]+	752733	1143829	63378.7	645773	637218	633787	63378.7	1170611	843779	63378.7	755774	1130273
2263	18.37	430.321	w/o MS2:(3R,7R,8R,8aS)-3,4'-dihydroxy-7'-(2-hydroxyethyl)-4,4,7,8a-tetramethylspiro[2,3,4a,5,6,7-hexahydro-1H-naphthalene-8,2'-3,8-dihydrofuro[2,3-e]isoindole]-6'-one	[M+H]+	380.524	380.524	23198	9020	3805	380.524	24644	380.524	380.524	25298	380.524	380.524
2270	1.022	431.132	w/o MS2:(1R,3R,6R,8S,10R,13S,16S,17R)-8-tert-butyl-6,17-dihydroxy-16-methyl-2,4,14,19-tetraoxahexacyclo[8.7.2.0?,??.0?,?.0?,??.0??,??]nonadecane-5,15,18-trione	[M+H]+	7358	10035	74722	22418	26376	7624	17107	21592	12336	4337	10588	20874
2271	14.951	431.187	w/o MS2:3-(2,4-dihydroxyphenyl)-7-hydroxy-6,8-bis(3-methylbut-2-enyl)-2,3-dihydrochromen-4-one	[M+H]+	118167	173197	127462	159157	283420	134644	146527	281669	215564	116257	184479	141193
2275	17.639	431.227	w/o MS2:PHYSOSTIGMINE SALICYLATE	[M+H]+	123.942	146465	123.942	10729	14955	1239	123.942	113579	123.942	123.942	1289	58332
2277	1.031	433.146	w/o MS2:(1R,2E,8S,10R,11S)-10,11-dihydroxy-6-(methoxymethyl)-1,10-dimethyl-5-oxo-4,14-dioxatricyclo[9.2.1.0?,?]tetradeca-2,6-dien-8-yl 2-methylprop-2-enoate	[M+H]+	23979	54714	57147	9700	28480	22952	63675	21229	19012	19712	24707	13773
2278	1.315	433.151	w/o MS2:Rotenone	[M+H]+	2438	36041	34929	9594	26898	27559	21863	49460	2541	18952	1285	31034
2279	14.927	433.235	w/o MS2:3,4-dimethyl-2,5-bis(3,4,5-trimethoxyphenyl)oxolane	[M+H]+	80852	28099	95320	86790	79659	88581	119638	48140	75031	93923	60472	74621
2283	15.575	434.243	w/o MS2:[(1S,3R,3aS,4S,8aR)-1-acetyloxy-3-hydroxy-6,8a-dimethyl-3-propan-2-yl-1,2,3a,4,5,8-hexahydroazulen-4-yl] 4-hydroxybenzoate	[M+H]+	12399	11215	1078.61	21935	10786	20243	1078.61	32525	31974	1078.61	18537	48375
2285	1.35	435.127	w/o MS2:naringenin-7-O-glucoside	[M+H]+	46009	94543	1187	282488	27283	41254	118.661	95226	57433	38307	62525	59854
2286	12.104	435.25	w/o MS2:5-[(Z)-14-(3,5-dihydroxyphenyl)tetradec-10-enyl]benzene-1,3-diol	[M+H]+	52116	43902	1215.59	41119	12156	17140	1215.59	47951	96028	1215.59	74693	38393
2287	15.552	435.252	w/o MS2:(2Z)-2-[(E)-6-(hydroxymethyl)-2,4,8,10-tetramethyldodec-2-enylidene]-4-methylpentanedioic acid	[M+H]+	211963	47283	11797	104553	41589	113450	35466	140677	157133	25078	163009	132531
2296	1.547	438.222	w/o MS2:[(3aR,4S,6E,10Z,11aR)-10-(hydroxymethyl)-6-methyl-3-methylidene-2-oxo-3a,4,5,8,9,11a-hexahydrocyclodeca[b]furan-4-yl] (Z)-4-acetyloxy-2-(hydroxymethyl)but-2-enoate	[M+H]+	3799.8	3799.8	48226	3799.8	3799.8	3799.8	37998	3799.8	3799.8	49854	3799.8	3799.8
2297	0.9	439.004	w/o MS2:4-hydroxy-7-methyl-2-[2-[3,4,5-trihydroxy-6-(hydroxymethyl)oxan-2-yl]oxypropan-2-yl]-2,3-dihydrofuro[3,2-g]chromen-5-one	[M+H]+	22445	78386	118442	15831	79781	33825	116613	33752	29563	109761	19955	62635
2298	1.639	439.137	w/o MS2:[3-hydroxy-1-(4-methoxy-7-oxofuro[3,2-g]chromen-9-yl)oxy-3-methylbutan-2-yl] (E)-2-methylbut-2-enoate	[M+H]+	54423	50952	283813	112599	205760	192499	346550	65541	55791	356902	33375	37327
2301	6.664	439.192	w/o MS2:methyl 2-[[4-hydroxy-3-(3-methylbut-2-enyl)phenyl]methyl]-3-(4-hydroxyphenyl)-4-methoxy-5-oxofuran-2-carboxylate	[M+H]+	2547	26109	116.355	1164	6085	10184	116.355	10765	33206	116.355	26954	33085
2302	23.307	439.204	w/o MS2:[(1S,3R,3aS,4S,8aR)-1-acetyloxy-3-hydroxy-6,8a-dimethyl-3-propan-2-yl-1,2,3a,4,5,8-hexahydroazulen-4-yl] 4-hydroxybenzoate	[M+H]+	1581873	578087	161339	2029215	597542	1026064	647942	1128665	1043635	442886	877470	1043802
2306	1.241	440.255	w/o MS2:6-hydroxy-9,12,13-trimethyl-14-(2-methylpropyl)-2H,5H,6H,7H,8H,13H,13aH,14H,15H,16H,16bH-oxacyclododeca[3,2-e]isoindole-2,16-dione	[M+H]+	19180	46186	59073	82266	23849	15108	61926	18256	23648	36213	12503	43057
2308	15.766	440.292	w/o MS2:7-[2,6-dimethyl-8-(2-methylbutanoyloxy)-1,2,6,7,8,8a-hexahydronaphthalen-1-yl]-3,5-dihydroxyheptanoic acid	[M+H]+	1860.94	1860.94	73496	48791	18609	22754	37980	1860.94	1860.94	58267	1860.94	1860.94
2309	2.178	441.151	w/o MS2:syringaresinol	[M+H]+	2910.11	2910.11	49704	2910.11	2910.11	2910.11	45464	2910.11	2910.11	29101	2910.11	2910.11
2310	1.494	441.173	w/o MS2:methyl 2-[[3-[(3,3-dimethyloxiran-2-yl)methyl]-4-hydroxyphenyl]methyl]-4-hydroxy-3-(4-hydroxyphenyl)-5-oxofuran-2-carboxylate	[M+H]+	11717	12714	56839	282859	21199	14747	62674	6628	19593	42453	3469	7648
2312	10.145	441.224	w/o MS2:methyl (4R,8aS)-1-hydroxy-2-(hydroxymethyl)-5,5,8a-trimethyl-4-[(2E,4E,6E)-octa-2,4,6-trienoyl]oxy-4a,6,7,8-tetrahydro-4H-naphthalene-1-carboxylate	[M+H]+	22433	109858	2243.26	115198	26087	23441	2243.26	85751	91715	2243.26	71807	85417
2313	7.718	441.24	w/o MS2:terpestacin	[M+H]+	22917	30949	6190	32086	18852	35799	7913	35667	37770	618.96	37126	48680
2318	20.184	443.177	w/o MS2:Strophanthidin	[M+H]+	196182	127153	120956	614804	84916	33730	77001	48405	40863	35336	14117	13650
2319	17.635	444.194	w/o MS2:[8,8-dimethyl-9-(3-methylbut-2-enoyloxy)-2-oxo-9,10-dihydropyrano[2,3-f]chromen-10-yl] 3-methylbut-2-enoate	[M+H]+	273.817	273.817	32656	18427	13527	2738	29539	273.817	273.817	11621	273.817	273.817
2320	21.012	444.419	w/o MS2:3-Epilupeol	[M+H]+	34184	3132.58	3132.58	3132.58	3132.58	3132.58	3132.58	3132.58	31326	3132.58	47260	3132.58
2321	14.925	445.202	w/o MS2:4-Methylabyssinone V	[M+H]+	243176	52222	320673	153039	127004	135338	299537	154185	215168	269020	183175	88180
2324	1.24	445.205	w/o MS2:[4,5,8-trihydroxy-5-(hydroxymethyl)-3-(3-methoxy-3-oxoprop-1-en-2-yl)-8a-methyl-1,2,3,4,4a,6,7,8-octahydronaphthalen-2-yl] 3,4-dihydroxy-2-methylidenebutanoate	[M+H]+	26556	113733	45039	418568	56142	51118	25591	110244	24018	44529	55618	105222
2325	8.271	445.256	w/o MS2:7-[2,6-dimethyl-8-(2-methylbutanoyloxy)-1,2,6,7,8,8a-hexahydronaphthalen-1-yl]-3,5-dihydroxyheptanoic acid	[M+H]+	68748	102308	169088	174199	194801	189457	134034	96265	139998	230857	78202	89976
2326	20.146	445.309	w/o MS2:Menaquinone-4	[M+H]+	2322	31906	232.217	232.217	232.217	232.217	232.217	31881	8311	232.217	3962	30238
2330	1.237	447.128	w/o MS2:ginkgolide B	[M+H]+	41452	36890	67409	39750	51791	44395	74195	40378	49776	70794	43534	36365
2333	17.622	447.218	w/o MS2:(Z)-2,6-dimethyl-7-(4-methyl-5-oxooxolan-2-yl)-3-[[3,4,5-trihydroxy-6-(hydroxymethyl)oxan-2-yl]oxymethyl]hept-5-enoic acid	[M+CH3OH+H]+	9044.54	9044.54	401654	115386	207795	90445	407252	9044.54	9044.54	330863	9044.54	9044.54
2339	1.067	449.109	w/o MS2:4-(3,4-dihydroxyphenyl)-7-hydroxy-5-[(2S,3R,4S,5S,6R)-3,4,5-trihydroxy-6-(hydroxymethyl)oxan-2-yl]oxychromen-2-one	[M+H]+	29633	39419	55252	71447	24585	52813	64324	94309	28766	46710	26062	24014
2341	1.4	451.1	w/o MS2:Rutilantinone	[2M+H]+	63728	265160	199122	141408	126277	204019	86823	244211	99399	135558	111388	244094
2343	1.42	451.158	w/o MS2:3,5-dihydroxy-2-(4-hydroxyphenyl)-7-[3,4,5-trihydroxy-6-(hydroxymethyl)oxan-2-yl]oxy-2,3-dihydrochromen-4-one	[M+Na]+	8528	15945	38185	304946	19510	17143	21572	13356	19273	40586	14444	24451
2344	13.917	451.213	w/o MS2:Cycloveratrylene	[M+H]+	37823	20689	1506.01	30443	37479	35373	1506.01	50497	69120	1506.01	58111	15060
2346	0.909	453.115	w/o MS2:3-oxo-3-[[(2R,3S,4S,5R,6S)-3,4,5-trihydroxy-6-(4-hydroxy-5-methyl-2-propan-2-ylphenoxy)oxan-2-yl]methoxy]propanoic acid	[M+ACN+Na]+	29564	56064	137125	47391	82927	75147	134458	33385	15309	120164	32718	23878
2349	7.231	453.337	w/o MS2:gamma-sitosterol//1,8-Diazacyclotetradecane-2,7-dione	[M+H]+	1626.31	1626.31	29717	1626.31	1626.31	1626.31	26443	1626.31	1626.31	16263	1626.31	1626.31
2350	9.83	454.293	w/o MS2:(E,2S,3R,4R,5S)-4-acetyloxy-2-amino-3,5,14-trihydroxyicos-6-enoic acid	[M+H]+	2348	26029	69025	17747	141407	151393	77960	249351	197781	88367	218983	237330
2352	0.785	455.116	w/o MS2:(1S,4aS,5S,7aS)-7-(acetyloxymethyl)-5-hydroxy-1-[(2S,3R,4S,5S,6R)-3,4,5-trihydroxy-6-(hydroxymethyl)oxan-2-yl]oxy-1,4a,5,7a-tetrahydrocyclopenta[c]pyran-4-carboxylic acid	[M+H]+	594242	513982	816496	668076	636232	623427	729715	476333	435974	763016	488975	159526
2353	1.155	455.131	w/o MS2:(2R,3S,4S,5R,6R)-5-[(2S,3R,4R)-3,4-dihydroxy-4-(hydroxymethyl)oxolan-2-yl]oxy-2-(hydroxymethyl)-6-(2-phenylethoxy)oxane-3,4-diol	[M+H]+	3934	1285	351733	30672	42315	63610	144005	5233	8796	316410	7613	128.54
2355	23.31	455.198	w/o MS2:schizandrin	[M+H]+	382890	130971	161676	108338	372596	162755	105497	119630	319521	272926	301334	333953
2357	10.828	455.353	w/o MS2:(1S,4S,5R,10S,13S,17S,19S,20R)-10-hydroxy-4,5,9,9,13,19,20-heptamethyl-24-oxahexacyclo[15.5.2.0?,??.0?,??.0?,??.0?,??]tetracos-15-en-23-one	[M+H]+	120.908	120.908	85941	1209	3937	120.908	93145	120.908	120.908	59017	120.908	120.908
2358	4.695	456.154	w/o MS2:[3-hydroxy-4-[(2S,3R,4S,5S,6R)-3,4,5-trihydroxy-6-(hydroxymethyl)oxan-2-yl]oxyphenyl]methyl 3,4-dihydroxybenzoate	[M+H]+	225.67	4633	10952	3746	13095	2257	8419	42119	10189	7993	15343	27852
2360	0.9	457.133	w/o MS2:apiosylskimmin	[M+H]+	41074	15890	51277	58234	37778	33936	26364	46609	41358	15777	34408	22466
2364	1.504	457.148	w/o MS2:[(2S,3R,4S,5S,6R)-3,4,5-trihydroxy-6-[[(E)-3-(4-hydroxyphenyl)prop-2-enoyl]oxymethyl]oxan-2-yl] (E)-3-phenylprop-2-enoate	[M+H]+	5261	14145	117239	16145	22546	46204	198437	22407	7594	124948	2471	15182
2365	11.127	457.235	w/o MS2:3-Deoxycaryoptinol	[M+H]+	17463	61671	1746.28	87578	42741	47883	1746.28	30916	120581	1746.28	122262	130779
2366	21.418	457.364	w/o MS2:Betulinic Acid	[M+H]+	709.973	13854	709.973	7100	7231	709.973	709.973	60863	27252	709.973	16662	50901
2367	25.903	459.181	w/o MS2:methyl 10-acetyloxy-4,5,9-trihydroxy-1,4a-dimethyl-7-propan-2-yl-2,3,4,9,10,10a-hexahydrophenanthrene-1-carboxylate	[M+H]+	114.505	114.505	13988	1319	5464	1145	10474	114.505	114.505	7964	114.505	114.505
2373	17.931	459.219	w/o MS2:(2Z,6E,10Z)-12-acetyloxy-10-(acetyloxymethyl)-6-methyl-2-(4-methylpent-3-enyl)dodeca-2,6,10-trienoic acid	[M+H]+	213.471	213.471	829214	2135	339277	296854	509699	213.471	213.471	795251	213.471	213.471
2375	1.458	460.151	w/o MS2:Villol	[M+H]+	119.779	119.779	72774	119.779	2371	1198	86618	119.779	119.779	20504	119.779	119.779
2376	15.366	460.224	w/o MS2:Lunarine	[M+H]+	125156	288321	215066	388231	327251	310685	399535	332476	248270	368796	224726	172782
2378	1.675	461.094	w/o MS2:[(2R,3R,4R,5R)-2-(2,4-dioxopyrimidin-1-yl)-4-hydroxy-5-(hydroxymethyl)oxolan-3-yl] 2,4-dimethoxy-6-methylbenzoate	[2M+H]+	2178.57	2178.57	21786	2178.57	2178.57	2178.57	45300	2178.57	2178.57	22430	2178.57	2178.57
2379	1.239	461.179	w/o MS2:(2R,2'S,4'aS,5'R,5''S,6'R,8'aS)-2'-(acetyloxy)-5''-(furan-3-yl)-6'-methyl-2'',8'-dioxo-octahydrodispiro[oxirane-2,1'-naphthalene-5',3''-oxolane]-8'a-ylmethyl acetate	[M+H]+	43518	175486	280947	133314	167125	151914	268348	181028	74271	220907	62811	170995
2380	17.626	461.232	w/o MS2:7-[2,6-dimethyl-8-(2-methylbutanoyloxy)-1,2,6,7,8,8a-hexahydronaphthalen-1-yl]-3,5-dihydroxyheptanoic acid	[M+H]+	41856.4	41856.4	1546131	418564	829149	728959	1620262	41856.4	41856.4	1317062	41856.4	41856.4
2384	18.623	462.164	w/o MS2:4-(2-Nitroethyl)phenyl 6-O-?-D-xylopyranosyl-?-D-glucopyranoside	[M+H]+	262.033	12669	262.033	262.033	262.033	262.033	262.033	6330	2620	262.033	262.033	6759
2386	1.067	463.089	w/o MS2:(2S,3S,4S,5R,6S)-6-[2-(3,4-dihydroxyphenyl)-5-hydroxy-4-oxochromen-7-yl]oxy-3,4,5-trihydroxyoxane-2-carboxylic acid	[M+H]+	589454	478426	47079	73760	392531	455887	473478	586649	716832	318039	717158	563335
2388	0.906	463.092	w/o MS2:Rutarin	[M+H]+	69288	23948	1415.83	14158	20632	16632	1415.83	27985	52059	1415.83	43017	28484
2390	1.337	463.194	w/o MS2:neosolaniol	[M+H]+	1523.98	25573	79050	15240	29839	28038	68360	23042	1523.98	54745	1523.98	20356
2391	9.168	463.208	w/o MS2:(1R,4R,7S,11E,15S,19R,20R,21S,22S,24R)-7,20,21,22,24-pentahydroxy-11,15-dimethyl-3,5,9,18,23-pentaoxatricyclo[17.3.1.1?,?]tetracos-11-en-10-one	[M+H]+	10241	13862	202.282	10152	202.282	2023	202.282	22433	6728	202.282	4914	17001
2397	0.876	465.094	w/o MS2:6-Hydroxysumatrol	[M+H]+	1596	17861	46022	26026	18210	28090	29545	11888	1620	26788	159.571	9417
2399	1.057	465.099	w/o MS2:myricitrin	[M+H]+	7634	1305	12085	122.151	1265	1222	7453	12064	5887	6497	7127	6169
2400	13.915	465.229	w/o MS2:methyl 8-hydroxy-4,5,7,10,14,14-hexamethyl-6,17-dioxo-16-oxapentacyclo[13.2.2.0?,??.0?,??.0?,?]nonadeca-3,7-diene-9-carboxylate	[M+H]+	80697	11698	118.702	16390	19510	30285	3687	76406	55623	1187	89174	29559
2403	1.387	467.132	w/o MS2:(2R,3R,4R,5R,6S)-2-[[(2R,3S,4S,5R,6S)-6-(4-ethenylphenoxy)-3,4,5-trihydroxyoxan-2-yl]methoxy]-6-methyloxane-3,4,5-triol	[M+CH3OH+H]+	819.319	25906	49155	32328	35472	15713	84700	27922	819.319	17747	819.319	8193
2405	18.039	467.297	w/o MS2:(1S,2R,5R,6R,10R,13S,15S)-5-[(2R,3E,5R)-5,6-dimethylhept-3-en-2-yl]-6,10-dimethyl-16,17-dioxapentacyclo[13.2.2.0?,?.0?,?.0??,??]nonadec-18-en-13-ol	[M+H]+	1358	34335	135.782	135.782	135.782	135.782	135.782	27509	135.782	135.782	135.782	12590
2406	15.765	467.313	w/o MS2:methyl (2E,8E)-9-[3a-hydroxy-6,7-dimethyl-1-(2-methylpropyl)-3-oxo-2,4,7,7a-tetrahydro-1H-isoindol-4-yl]-4,5-dihydroxy-8-methylnona-2,8-dienoate	[2M+H]+	10363	25920	1036.29	38561	25571	29895	1036.29	51204	42535	1036.29	34203	80582
2411	10.16	469.257	w/o MS2:Hecogenin	[M+H]+	281189	699654	28118.9	472043	381863	424445	28118.9	619909	554422	28118.9	553539	634803
2420	0.901	471.129	w/o MS2:osmanthuside H	[M+H]+	145.84	145.84	17227	1458	7375	1526	17151	145.84	145.84	8956	145.84	145.84
2422	11.242	471.271	w/o MS2:[(2E,6Z,10Z)-7,11-bis(acetyloxymethyl)-3,15-dimethylhexadeca-2,6,10,14-tetraenyl] acetate	[M+H]+	695.075	10132	695.075	695.075	695.075	695.075	695.075	13003	11775	695.075	6951	17915
2423	17.949	471.345	w/o MS2:18b-glycyrrhetinic acid	[M+H]+	522.665	128347	522.665	10654	5227	5901	522.665	112244	522.665	522.665	522.665	98507
2424	8.964	471.347	w/o MS2:15-formyl-16-hydroxy-1,2,14,17,17-pentamethyl-8-(prop-1-en-2-yl)pentacyclo[11.7.0.0?,??.0?,?.0??,??]icosane-5-carboxylic acid	[M+H]+	656999	1198081	255996	654572	689822	661945	253325	1094330	630044	201275	642472	1017023
2426	1.017	473.143	w/o MS2:[(1S)-5-hydroxy-1-[(2S,3R,4S,5S,6R)-3,4,5-trihydroxy-6-(hydroxymethyl)oxan-2-yl]oxy-1,4a,5,7a-tetrahydrocyclopenta[c]pyran-7-yl]methyl benzoate	[M+H]+	13905	7219	66125	11981	21583	30569	57654	12452	12217	20265	29873	18426
2427	12.091	473.199	w/o MS2:2R,3S,4S,5R,6S)-2-[[(2R,3R,4R)-3,4-dihydroxy-4-(hydroxymethyl)oxolan-2-yl]oxymethyl]-6-[4-hydroxy-3-(3-methylbut-2-enyl)phenoxy]oxane-3,4,5-triol	[M+H]+	5044	16466	17893	6838	11466	9741	20490	12106	12725	25828	14200	13608
2428	15.35	473.233	w/o MS2:[(2R)-2-[(E,2S,4R)-4,6-dimethyloct-6-en-2-yl]-6-oxo-2,3-dihydropyran-3-yl] (2E,4E,6S)-8-hydroxy-6-(hydroxymethyl)-4-methylocta-2,4-dienoate	[M+H]+	29737	78277	72043	64177	51347	53309	125050	97042	56871	113754	21537	48960
2434	12.111	474.204	w/o MS2:2-[3,4-dihydroxy-2,2-dimethyl-8-(3-methylbut-2-enoxy)-3,4-dihydrochromen-6-yl]-5,7-dihydroxy-2,3-dihydrochromen-4-one	[M+H]+	8141	24485	20569	33716	8805	23016	19426	25916	15962	9151	11477	25079
2435	0.889	474.96	w/o MS2:1-[2,4-dihydroxy-3-[(2S,3R,4R,5S,6R)-3,4,5-trihydroxy-6-(hydroxymethyl)oxan-2-yl]phenyl]-2-hydroxy-3-(4-hydroxyphenyl)propan-1-one	[M+H]+	4167.57	4167.57	87824	4167.57	4167.57	4167.57	58206	4167.57	4167.57	41676	4167.57	4167.57
2436	15.707	475.213	w/o MS2:[(4R,6aR,9S,9aR,9bR)-9-methyl-3,6-dimethylidene-2,8-dioxo-3a,4,5,6a,7,9,9a,9b-octahydroazuleno[4,5-b]furan-4-yl] (E)-4-hydroxy-2-[[(E)-4-hydroxy-2-methylbut-2-enoyl]oxymethyl]but-2-enoate	[M+H]+	1814.25	1814.25	49777	25598	21211	18142	45670	1814.25	1814.25	70226	1814.25	1814.25
2438	14.413	475.214	w/o MS2:[(1S,2R,4aR,8aR)-1-acetyloxy-1,4a-dimethyl-6-oxo-7-propan-2-ylidene-2,3,4,5,8,8a-hexahydronaphthalen-2-yl] 3-acetyloxy-2-hydroxy-2-methylbutanoate	[M+H]+	73139	27470	40557	58530	50947	49288	70161	19419	82592	38933	51168	31849
2439	14.944	476.241	Unknown//phosphatidylethanolamine lyso 16:0	[M+H]+	8356	28457	4253	1195	16998	26115	9391	31930	9769	11591	21274	15610
2440	15.37	476.25	w/o MS2:2,7,7,11,15,17-hexamethyl-18-methylidene-5,13,16-trioxo-6,14-dioxatetracyclo[9.8.0.0?,?.0??,??]nonadec-3-en-10-yl acetate	[M+H]+	247.113	16749	14271	11757	13545	22251	24706	22326	3862	35789	2471	10142
2443	17.63	477.227	w/o MS2:1,7-bis(4-hydroxyphenyl)-5-[(2R,3R,4S,5S,6R)-3,4,5-trihydroxy-6-(hydroxymethyl)oxan-2-yl]oxyheptan-3-one	[M+CH3OH+H]+	1430.97	1430.97	126055	66868	60078	14310	122720	1430.97	1430.97	66425	1430.97	1430.97
2446	15.366	477.247	w/o MS2:Dihydrogedunic Acid, Methyl Ester	[M+H]+	13459	8894	33410	15771	26116	6663	49441	35585	4224	13372	5331	16348
2447	13.91	477.264	w/o MS2:arthrobactin	[M+H]+	23016	4383	438.264	16130	11583	19826	438.264	7337	34085	438.264	46018	20469
2448	12.111	477.334	w/o MS2:(1S,4S,5R,10S,13S,17S,19S,20R)-10-hydroxy-4,5,9,9,13,19,20-heptamethyl-24-oxahexacyclo[15.5.2.0?,??.0?,??.0?,??.0?,??]tetracos-15-en-23-one	[M+H]+	7965	42247	118.608	1186	7316	7641	118.608	13922	16307	118.608	21527	21668
2450	14.943	478.241	w/o MS2:(2R,3S,4S,5R,6R)-2-[[(2R,3R,4R)-3,4-dihydroxy-5-(hydroxymethyl)oxolan-2-yl]oxymethyl]-6-[4-(4-hydroxyphenyl)butan-2-yloxy]oxane-3,4,5-triol	[M+H]+	7734	13425	13390	8345	10323	2805	9510	8185	15717	3671	3580	6793
2452	1.675	479.104	w/o MS2:auranticin A	[M+H]+	6962.37	6962.37	96469	6962.37	6962.37	6962.37	100340	6962.37	6962.37	69624	6962.37	6962.37
2453	19.11	480.295	w/o MS2:Agelasine (Stereochemistry Of Diterpene Unknown)	[M+H]+	1208.15	1208.15	17289	1208.15	1208.15	1208.15	18931	1208.15	1208.15	12081	1208.15	1208.15
2456	1.248	481.206	w/o MS2:methyl 8-hydroxy-4,5,7,10,14,14-hexamethyl-6,17-dioxo-16-oxapentacyclo[13.2.2.0?,??.0?,??.0?,?]nonadeca-3,7-diene-9-carboxylate	[M+H]+	43744	44248	2724.96	358106	29063	27251	2724.96	62440	46063	2724.96	27250	59963
2457	7.716	481.233	w/o MS2:methyl 8-hydroxy-4,5,7,10,14,14-hexamethyl-6,17-dioxo-16-oxapentacyclo[13.2.2.0?,??.0?,??.0?,?]nonadeca-3,7-diene-9-carboxylate	[M+Na]+	50738	80694	30476	135726	52739	51506	24831	77292	48590	9420	45409	40342
2460	0.995	483.128	w/o MS2:silybin	[M+H]+	5245	14350	10744	24671	16271	10979	20682	15577	11263	19351	11141	9848
2461	0.886	483.133	w/o MS2:silybin	[M+H]+	32436	30735	20833	23649	16165	18866	16159	33755	31549	7668	27259	12584
2462	21.843	483.162	w/o MS2:(2R,2'S,4'aS,5'R,5''S,6'R,8'aS)-2'-(acetyloxy)-5''-(furan-3-yl)-6'-methyl-2'',8'-dioxo-octahydrodispiro[oxirane-2,1'-naphthalene-5',3''-oxolane]-8'a-ylmethyl acetate	[M+H]+	114.707	114.707	13913	1147	114.707	114.707	22201	114.707	114.707	5716	114.707	114.707
2463	7.662	483.2	w/o MS2:(2R,3S,4S,5R,6R)-2-[[(2R,3R,4R)-3,4-dihydroxy-5-(hydroxymethyl)oxolan-2-yl]oxymethyl]-6-[4-(4-hydroxyphenyl)butan-2-yloxy]oxane-3,4,5-triol	[M+H]+	461.275	13397	461.275	461.275	461.275	461.275	461.275	13507	461.275	461.275	461.275	4613
2468	7.667	483.347	w/o MS2:Glycocholic Acid	[M+H]+	115.184	5612	31438	1300	6079	4582	14859	6274	2350	27381	1303	1152
2472	22.242	484.414	w/o MS2:Ergosterol Acetate	[M+H]+	701.399	701.399	16904	11758	21010	7014	27781	701.399	701.399	17836	701.399	701.399
2473	10.149	485.23	w/o MS2:3-[7-hydroxy-8-(2-hydroxypropan-2-yl)-11-methoxy-4,5a,9-trimethyl-1-oxo-3,6,7,8,9a,10-hexahydro-[2]benzofuro[5,6-b]chromen-9-yl]propanoic acid	[M+H]+	770.084	13186	770.084	770.084	770.084	770.084	770.084	21126	11687	770.084	7701	12456
2476	12.456	485.323	w/o MS2:(2R,3S,4S,5S,6R)-2-[[7-hydroxy-4-[(Z)-5-hydroxy-3-methylpent-3-enyl]-4a,8,8-trimethyl-3-methylidene-2,4,5,6,7,8a-hexahydro-1H-naphthalen-2-yl]oxy]-6-(hydroxymethyl)oxane-3,4,5-triol	[M+H]+	994.344	9943	994.344	994.344	994.344	994.344	994.344	10843	994.344	994.344	994.344	13113
2482	16.925	487.165	w/o MS2:(2S,3R,4aS,12bR)-2,3,4a,8-tetrahydroxy-12b-(5-hydroxy-6-methyloxan-2-yl)oxy-3-methyl-2,4-dihydrobenzo[a]anthracene-1,7,12-trione	[M+H]+	94508	98567	6259	484094	463744	425859	305843	671974	575798	421266	340792	598353
2484	17.623	487.246	w/o MS2:[(2E,6Z,10Z)-7,11-bis(acetyloxymethyl)-3,15-dimethylhexadeca-2,6,10,14-tetraenyl] acetate	[M+H]+	7511.26	7511.26	709620	178467	399677	75113	753966	7511.26	7511.26	641494	7511.26	7511.26
2486	15.368	487.249	w/o MS2:Alpha-Dihydrogedunol	[M+H]+	20222	31793	53611	49250	43628	53863	66905	87066	63020	102684	30684	47786
2488	17.813	487.326	w/o MS2:(1R,2R,5S,8R,14R,15R,16S)-16-hydroxy-1,2,14,17,17-pentamethyl-8-(prop-1-en-2-yl)pentacyclo[11.7.0.0?,??.0?,?.0??,??]icosane-5,15-dicarboxylic acid	[M+H]+	138.065	67220	138.065	1381	2787	138.065	138.065	63168	138.065	138.065	138.065	20444
2489	1.284	487.342	w/o MS2:(1R,2R,5S,8R,14R,15R,16S)-16-hydroxy-1,2,14,17,17-pentamethyl-8-(prop-1-en-2-yl)pentacyclo[11.7.0.0?,??.0?,?.0??,??]icosane-5,15-dicarboxylic acid	[M+H]+	1781.9	1781.9	17819	1781.9	1781.9	1781.9	26950	1781.9	1781.9	18702	1781.9	1781.9
2490	14.942	489.252	w/o MS2:13-(acetyloxy)-1,6-dihydroxy-8-(hydroxymethyl)-4,12,12,15-tetramethyl-5-oxotetracyclo[8.5.0.0?,?.0??,??]pentadeca-3,8-dien-14-yl (2E)-2-methylbut-2-enoate	[M+H]+	13907	15844	22043	14443	29454	42178	35351	40627	29577	37364	17358	19104
2491	16.784	489.338	w/o MS2:[(7R,8R,10R,13S)-17-(furan-3-yl)-4,4,8,10,13-pentamethyl-3,16-dioxo-6,7,9,11,12,17-hexahydro-5H-cyclopenta[a]phenanthren-7-yl] acetate	[M+H]+	833.589	833.589	11369	833.589	833.589	833.589	20545	833.589	833.589	8336	833.589	833.589
2492	18.566	489.357	w/o MS2:Asiatic Acid	[M+H]+	29453	30805	14770	12954	9394	20421	23285	10546	7610	42102	27715	23121
2493	20.343	489.39	w/o MS2:(1R,2R,4aS,6aS,6bR,10S,12aR,14bS)-1,8,10-trihydroxy-1,2,6a,6b,9,9,12a-heptamethyl-2,3,4,5,6,6a,7,8,8a,10,11,12,13,14b-tetradecahydropicene-4a-carboxylic acid	[M+H]+	27190	4698	469.801	469.801	469.801	469.801	469.801	469.801	9888	469.801	14054	469.801
2496	2.783	491.097	w/o MS2:6-(furan-3-yl)-13-hydroxy-5,12,16,16-tetramethyl-7,10,17-trioxahexacyclo[13.3.3.0?,??.0?,??.0?,??.0?,??]henicos-19-ene-8,14,21-trione	[M+H]+	1501	14425	22779	7122	19190	24482	27402	55563	10496	4699	8398	24275
2499	17.621	491.22	w/o MS2:(E)-5-hydroxy-N-[3-[5-[3-[[(E)-5-hydroxy-3-methylpent-2-enoyl]amino]propyl]-3,6-dioxopiperazin-2-yl]propyl]-3-methylpent-2-enamide	[M+CH3OH+H]+	157.515	157.515	94345	1575	4160	24163	278892	157.515	157.515	108793	157.515	157.515
2502	9.161	491.24	w/o MS2:[(1S,2R,4aR,8aR)-1-acetyloxy-1,4a-dimethyl-6-oxo-7-propan-2-ylidene-2,3,4,5,8,8a-hexahydronaphthalen-2-yl] 3-acetyloxy-2-hydroxy-2-methylbutanoate	[M+H]+	217442	175403	6472.91	103595	64729	179959	6472.91	244539	135226	6472.91	212227	268305
2510	13.888	492.219	w/o MS2:[(4R,6aR,9S,9aR,9bR)-9-methyl-3,6-dimethylidene-2,8-dioxo-3a,4,5,6a,7,9,9a,9b-octahydroazuleno[4,5-b]furan-4-yl] (E)-4-hydroxy-2-[[(E)-4-hydroxy-2-methylbut-2-enoyl]oxymethyl]but-2-enoate	[M+H]+	52959	24641	7310	497.853	41926	23178	10447	103158	133253	4979	126121	46254
2514	1.571	493.113	w/o MS2:5-[(2R,3S)-6-hydroxy-2-(4-hydroxyphenyl)-4-[(E)-2-(4-hydroxyphenyl)ethenyl]-2,3-dihydro-1-benzofuran-3-yl]benzene-1,3-diol// salvianolic acid A	[M+H]+	118.028	14796	118.028	118.028	1181	118.028	118.028	13176	1180	118.028	118.028	7855
2515	14.329	493.187	w/o MS2:8-Hydroxycarapinic Acid	[M+H]+	615.391	16222	615.391	615.391	615.391	615.391	615.391	12782	615.391	615.391	615.391	6154
2516	1.169	493.205	w/o MS2:plumieride	[M+H]+	16774	18739	63988	18137	39487	21877	33447	13516	21338	22860	11369	12543
2517	7.864	493.328	w/o MS2:15-formyl-16-hydroxy-1,2,14,17,17-pentamethyl-8-(prop-1-en-2-yl)pentacyclo[11.7.0.0?,??.0?,?.0??,??]icosane-5-carboxylic acid	[M+H]+	94669	109797	4723.68	65322	57922	67430	4723.68	98827	102518	4723.68	104622	47237
2521	13.893	494.267	w/o MS2:Dihydrogedunic Acid, Methyl Ester	[M+H]+	174524	45894	41283	72163	65204	144160	41606	89555	122862	14696	133421	83492
2526	10.953	495.168	w/o MS2:[(2S,3R,4S,5S,6R)-3,4,5-trihydroxy-6-[[(E)-3-(4-hydroxyphenyl)prop-2-enoyl]oxymethyl]oxan-2-yl] (E)-3-phenylprop-2-enoate	[M+H]+	120.155	120.155	665887	1202	324165	302391	298897	120.155	120.155	535297	120.155	120.155
2527	18.622	495.196	w/o MS2:(2S,3R,5R,10R,13R,14S,17S)-2,3,14-trihydroxy-10,13-dimethyl-17-[(2R,3R,5R)-2,3,6-trihydroxy-5,6-dimethylheptan-2-yl]-2,3,4,5,9,11,12,15,16,17-decahydro-1H-cyclopenta[a]phenanthren-6-one	[M+H]+	89425	132592	3307.52	33075	61546	64440	3307.52	107659	93887	3307.52	84426	116822
2529	19.285	495.199	w/o MS2:[(3R,4S,8S,8aS)-3-hydroxy-6,8a-dimethyl-8-[(Z)-2-methylbut-2-enoyl]oxy-3-propan-2-yl-1,2,3a,4,5,8-hexahydroazulen-4-yl] 4-hydroxybenzoate	[M+H]+	140817	126387	79317	150368	188068	198066	46039	330292	228016	86125	231408	159301
2533	9.179	495.344	w/o MS2:(2S,3R,5R,10R,13R,14S,17S)-2,3,14-trihydroxy-10,13-dimethyl-17-[(2R,3R,5R)-2,3,6-trihydroxy-5,6-dimethylheptan-2-yl]-2,3,4,5,9,11,12,15,16,17-decahydro-1H-cyclopenta[a]phenanthren-6-one	[M+H]+	10816	31144	5788	32213	4195	4898	40417	33958	13901	419.478	13624	15022
2537	9.434	496.34	w/o MS2:Alpha-Ergocryptine	[M+H]+	14688	39474	28169	22773	21631	21676	17510	153294	82681	1305	89937	97795
2538	1.675	497.114	w/o MS2:9-methoxy-7-[4-[(2S,3R,4S,5S,6R)-3,4,5-trihydroxy-6-(hydroxymethyl)oxan-2-yl]oxyphenyl]-[1,3]dioxolo[4,5-g]chromen-8-one	[2M+H]+	9185.37	9185.37	133904	9185.37	9185.37	9185.37	127975	9185.37	9185.37	91854	9185.37	9185.37
2539	1.031	497.147	w/o MS2:(2R,3S,4S,5R,6R)-2-(hydroxymethyl)-6-[[(2R,3S,4S,5R,6S)-3,4,5-trihydroxy-6-(2-hydroxy-4-prop-2-enylphenoxy)oxan-2-yl]methoxy]oxane-3,4,5-triol	[M+H]+	12491	82954	29931	37068	75323	35532	23427	44396	44557	21099	33885	49281
2542	1.249	497.179	w/o MS2:[(4R,6aR,9S,9aR,9bR)-9-methyl-3,6-dimethylidene-2,8-dioxo-3a,4,5,6a,7,9,9a,9b-octahydroazuleno[4,5-b]furan-4-yl] (E)-4-hydroxy-2-[[(E)-4-hydroxy-2-methylbut-2-enoyl]oxymethyl]but-2-enoate	[M+H]+	53294	130671	126709	51414	66208	110293	105318	132066	74656	51595	74857	127869
2544	7.005	497.311	w/o MS2:2-[(6,7-dimethoxy-1,2,3,4-tetrahydroisoquinolin-1-yl)methyl]-3-ethyl-9,10-dimethoxy-5-oxido-2,3,4,6,7,11b-hexahydro-1H-benzo[a]quinolizin-5-ium	[M+H]+	1617.79	1617.79	82701	19391	16178	16964	74454	1617.79	1617.79	48961	1617.79	1617.79
2547	0.882	499.122	w/o MS2:(2R,2'S,4'aS,5'R,5''S,6'R,8'aS)-2'-(acetyloxy)-5''-(furan-3-yl)-6'-methyl-2'',8'-dioxo-octahydrodispiro[oxirane-2,1'-naphthalene-5',3''-oxolane]-8'a-ylmethyl acetate	[M+H]+	12842	33973	21999	30860	28227	34329	44244	29274	27730	18260	18735	9827
2548	0.909	499.193	w/o MS2:1,7-bis(4-hydroxyphenyl)-5-[(2R,3R,4S,5S,6R)-3,4,5-trihydroxy-6-(hydroxymethyl)oxan-2-yl]oxyheptan-3-one	[M+H]+	244.215	6605	66952	27774	31797	26646	70995	5351	244.215	55900	244.215	2442
2550	11.53	499.212	w/o MS2:(1R,3E,5R,7S,11R,12R,13S,14S)-1,13-bis(acetyloxy)-3,6,6,14-tetramethyl-10-methylidene-2-oxotricyclo[10.3.0.0?,?]pentadec-3-en-11-yl acetate	[M+H]+	586	24287	586	5860	15970	13344	586	14195	24426	586	19635	20603
2552	13.75	499.213	w/o MS2:4-[5-[[4-[5-[acetyl(hydroxy)amino]pentylamino]-4-oxobutanoyl]-hydroxyamino]pentylamino]-4-oxobutanoic acid	[M+H]+	16811	16114	9641	7903	31215	24737	13104	18721	49840	13745	15580	37926
2553	20.184	499.24	w/o MS2:arthrobactin	[M+H]+	1020019	755025	738245	2968044	566272	326579	543263	386197	339998	339817	221687	195317
2556	17.63	501.227	w/o MS2:7-(3,4-dihydroxyphenyl)-1-(4-hydroxyphenyl)-5-[(2S,3R,4S,5R)-3,4,5-trihydroxyoxan-2-yl]oxyheptan-3-one	[M+H]+	133.875	133.875	28073	9836	6408	1339	41874	133.875	133.875	11408	133.875	133.875
2561	8.985	502.33	w/o MS2:(2R,3S,4S,5S,6R)-2-[[7-hydroxy-4-[(Z)-5-hydroxy-3-methylpent-3-enyl]-4a,8,8-trimethyl-3-methylidene-2,4,5,6,7,8a-hexahydro-1H-naphthalen-2-yl]oxy]-6-(hydroxymethyl)oxane-3,4,5-triol	[M+H]+	106766	65603	24967	46897	89544	84852	20979	118574	106008	16330	99674	46364
2562	1.004	503.192	w/o MS2:Peoniflorin	[M+H]+	1585	15797	122.491	1225	3648	122.491	122.491	7642	5104	122.491	3064	11451
2563	17.625	503.227	w/o MS2:1-[[(2S,3R,11bR)-3-ethyl-9,10-dimethoxy-2,3,4,6,7,11b-hexahydro-1H-benzo[a]quinolizin-2-yl]methyl]-7-methoxy-3,4-dihydro-2H-isoquinolin-6-one	[M+H]+	2802.74	2802.74	127636	97008	203013	28027	218224	2802.74	2802.74	102244	2802.74	2802.74
2567	13.917	503.244	w/o MS2:(2S,3R,4R,5R,6R)-2-methyl-6-[[(2R,3S,4S,5R,6R)-3,4,5-trihydroxy-6-[(E)-7-hydroxy-3,7-dimethyloct-3-enoxy]oxan-2-yl]methoxy]oxane-3,4,5-triol	[M+H]+	227982	38330	17038	95407	69385	88077	72923	106963	264382	35684	144801	89073
2572	10.548	504.345	w/o MS2:Glycocholic Acid	[M+H]+	114675	110485	117.538	36495	79374	77906	1175	100538	114614	117.538	107338	89875
2573	16.335	504.36	w/o MS2:(1R,2R,5S,8R,14R,15R,16S)-16-hydroxy-1,2,14,17,17-pentamethyl-8-(prop-1-en-2-yl)pentacyclo[11.7.0.0?,??.0?,?.0??,??]icosane-5,15-dicarboxylic acid	[M+H]+	562.03	562.03	111738	11716	5620	12522	114246	562.03	562.03	81456	562.03	562.03
2576	17.622	505.226	w/o MS2:(1S,4aR,6aS,6bR,9R,10R,11R,12aR,14bS)-1,10,11-trihydroxy-9-(hydroxymethyl)-2,2,6a,6b,9,12a-hexamethyl-1,3,4,5,6,6a,7,8,8a,10,11,12,13,14b-tetradecahydropicene-4a-carboxylic acid	[M+CH3OH+H]+	13846.9	13846.9	538216	138468	291554	239869	541045	13846.9	13846.9	448982	13846.9	13846.9
2579	17.93	505.229	w/o MS2:1-[(2E,4E)-6,7-Dihydroxy-2,4-octadienoyl]prolyl-N-methylvalyl-N2-methylalaninamide	[M+CH3OH+H]+	536.071	536.071	70459	5361	12295	26022	81387	536.071	536.071	65114	536.071	536.071
2580	9.772	505.254	w/o MS2:4-[[4-hydroxy-2-(2-methylpropyl)-1-oxo-3,3a-dihydro-2H-imidazo[1,2-a]indol-4-yl]methyl]-1-methyl-2,4-dihydro-1H-pyrazino[2,1-b]quinazoline-3,6-dione	[M+H]+	62783	30503	13181	77075	31616	21136	4426	32962	24207	442.554	25891	38986
2582	9.203	505.352	w/o MS2:(1R,2R,4aS,6aS,6bR,9R,10R,11R,12aR)-1,10,11-trihydroxy-9-(hydroxymethyl)-1,2,6a,6b,9,12a-hexamethyl-2,3,4,5,6,6a,7,8,8a,10,11,12,13,14b-tetradecahydropicene-4a-carboxylic acid	[M+H]+	14209	13622	129.842	1298	129.842	129.842	129.842	18641	20313	129.842	17635	6847
2585	15.578	506.231	w/o MS2:TOBRAMYCIN	[M+H]+	61179	57321	249.027	110326	79213	11155	249.027	89097	31697	2490	161908	77327
2586	3.336	507.128	w/o MS2:Mexicanolide	[M+H]+	36623	69804	997.744	9977	28496	54335	997.744	60401	30832	997.744	13307	57329
2590	13.49	507.346	w/o MS2:Euphol Acetate	[M+H]+	1294.65	1294.65	19696	1294.65	15828	12946	37593	1294.65	1294.65	46118	1294.65	1294.65
2591	8.193	509.18	w/o MS2:6-[2-hydroxy-3-methyl-3-[(2S,3R,4S,5S,6R)-3,4,5-trihydroxy-6-(hydroxymethyl)oxan-2-yl]oxybutyl]-5,7-dimethoxychromen-2-one	[M+H]+	11471	13981	116.411	116.411	116.411	116.411	116.411	11181	12366	116.411	9990	1164
2592	14.867	509.324	w/o MS2:(1R,2R,5S,8R,14R,15R,16S)-16-hydroxy-1,2,14,17,17-pentamethyl-8-(prop-1-en-2-yl)pentacyclo[11.7.0.0?,??.0?,?.0??,??]icosane-5,15-dicarboxylic acid	[M+H]+	116.453	14357	7744	7661	7184	116.453	11534	19557	116.453	1165	116.453	15036
2593	5.301	511.123	w/o MS2:[(4E)-7-acetyloxy-6-hydroxy-2-methyl-10-oxo-2,3,6,7,8,9-hexahydrooxecin-3-yl] (E)-but-2-enoate	[M+H]+	114.51	18881	114.51	114.51	114.51	114.51	114.51	29741	1145	114.51	114.51	17259
2595	10.314	511.197	w/o MS2:13-(acetyloxy)-1-hydroxy-8-(hydroxymethyl)-4,12,12,15-tetramethyl-5-oxotetracyclo[8.5.0.0?,?.0??,??]pentadeca-3,8-dien-14-yl (2E)-2-methylbut-2-enoate	[M+H]+	34513	78323	1344.02	13440	61115	16585	1344.02	67957	53370	1344.02	31757	27238
2596	23.31	511.26	w/o MS2:2-[(2R,4aS,8S,8aS)-8-[2-[(4aS,7R,8aR)-7-(1-carboxyethenyl)-1-hydroxy-4a-methyl-2-oxo-6,7,8,8a-tetrahydro-5H-naphthalen-1-yl]ethyl]-4a-methyl-7-oxo-1,2,3,4,8,8a-hexahydronaphthalen-2-yl]prop-2-enoic acid	[M+H]+	617661	568001	694398	172134	243161	569232	170831	1159144	177419	105712	573132	505615
2600	7.271	511.339	w/o MS2:Asiatic Acid	[M+H]+	122.211	11307	241129	332903	71239	14225	81479	9062	1222	20664	122.211	9066
2602	18.624	512.203	w/o MS2:[4-[3,4,5-trihydroxy-6-(hydroxymethyl)oxan-2-yl]oxyphenyl]methyl 2,3-dihydroxy-2-[(4-hydroxyphenyl)methyl]butanoate	[M+H]+	10987	13811	256.294	256.294	6191	2563	256.294	30662	12857	256.294	14676	12172
2603	23.312	512.265	w/o MS2:(2R,3R,4S,5S,6R)-2-[(3R)-1,7-bis(3,4-dihydroxyphenyl)heptan-3-yl]oxy-6-(hydroxymethyl)oxane-3,4,5-triol	[M+H]+	60053	180223	45501	36254	184330	184703	173720	201233	54911	85186	128094	162648
2604	0.895	513.153	w/o MS2:[(4R,6aR,9S,9aR,9bR)-9-methyl-3,6-dimethylidene-2,8-dioxo-3a,4,5,6a,7,9,9a,9b-octahydroazuleno[4,5-b]furan-4-yl] (E)-4-hydroxy-2-[[(E)-4-hydroxy-2-methylbut-2-enoyl]oxymethyl]but-2-enoate	[M+H]+	62428	93343	59416	67533	85230	80415	43274	107925	51770	23056	38465	100281
2606	10.985	513.177	w/o MS2:[(4R,6aR,9S,9aR,9bR)-9-methyl-3,6-dimethylidene-2,8-dioxo-3a,4,5,6a,7,9,9a,9b-octahydroazuleno[4,5-b]furan-4-yl] (E)-4-hydroxy-2-[[(E)-4-hydroxy-2-methylbut-2-enoyl]oxymethyl]but-2-enoate	[M+H]+	26201	36427	12794	39598	36341	49759	10414	59145	75527	1041.4	64226	37990
2607	14.418	513.228	w/o MS2:Gitoxigenin Diacetate	[M+H]+	33042	22131	32780	58121	46116	55513	26260	46160	22947	53477	50058	26313
2609	1.318	513.267	w/o MS2:3,6-dibenzyl-9-[(2,3-diamino-1,2-dihydroindol-3-yl)methyl]-1,4,7-triazonane-2,5,8-trione	[M+H]+	311.931	311.931	44495	78942	4557	3119	45594	311.931	311.931	26786	311.931	311.931
2613	1.675	515.124	w/o MS2:Carminic Acid	[M+H]+	4609.93	4609.93	98358	4609.93	4609.93	4609.93	46099	4609.93	4609.93	68910	4609.93	4609.93
2615	1.025	515.189	w/o MS2:(2R,3S,4S,5S,6R)-2-[4-[7-hydroxy-3-(hydroxymethyl)-5-(3-hydroxypropyl)-2,3-dihydro-1-benzofuran-2-yl]-2-methoxyphenoxy]-6-methyloxane-3,4,5-triol	[M+H]+	128.837	13337	175346	42951	30274	25902	165429	6420	1288	85787	2417	10020
2622	6.672	515.263	w/o MS2:5-amino-2-(3,4'-dihydroxy-4,4,7,8a-tetramethyl-6'-oxospiro[2,3,4a,5,6,7-hexahydro-1H-naphthalene-8,2'-3,8-dihydrofuro[2,3-e]isoindole]-7'-yl)-5-oxopentanoic acid	[M+H]+	22962	18178	1418.92	22284	21099	15268	1418.92	37273	38607	1418.92	35996	14189
2624	7.484	515.321	w/o MS2:arthrobactin	[M+H]+	266590	217401	110041	225703	235805	226312	203411	216898	281745	168688	272175	206802
2626	24.678	516.249	w/o MS2:2-[(3R,8aS)-3,4'-dihydroxy-4,4,7,8a-tetramethyl-6'-oxospiro[2,3,4a,5,6,7-hexahydro-1H-naphthalene-8,2'-3,8-dihydrofuro[2,3-e]isoindole]-7'-yl]pentanedioic acid	[M+H]+	285126	176819	297833	852779	1006515	378622	1054421	838544	1028274	61517	333649	772918
2632	14.938	517.248	w/o MS2:2-[(6,7-dimethoxy-3,4-dihydroisoquinolin-1-yl)methyl]-3-ethyl-9,10-dimethoxy-2,3,4,6,7,11b-hexahydro-1H-benzo[a]quinolizine	[M+H]+	23281	14536	25545	20890	72354	23007	23808	14120	9706	26123	20334	54530
2633	17.926	517.257	w/o MS2:(2R,4'aR,5'S,6'R,6'aS,10'aR,10'bR)-6'-(acetyloxy)-4'a,6'a,10'b-trimethyl-5''-oxo-decahydro-1'H-dispiro[oxirane-2,7'-naphtho[2,1-b]pyran-3',3''-oxolane]-5'-yl 2-methylpropanoate	[M+H]+	1197.05	1197.05	56497	1197.05	11971	29542	74568	1197.05	1197.05	96745	1197.05	1197.05
2634	1.597	517.316	w/o MS2:9-hydroxy-5b,8,11a-trimethyl-1-prop-1-en-2-yl-1,2,3,4,5,6,7,7a,9,10,11,11b,12,13,13a,13b-hexadecahydrocyclopenta[a]chrysene-3a,5a,8-tricarboxylic acid	[M+H]+	7334	9648	247.595	247.595	247.595	247.595	247.595	24998	9272	247.595	2476	5216
2639	7.308	518.325	w/o MS2:Alpha-Ergocryptine	[M+H]+	35191	40106	35526	91698	10423	10631	20632	20161	6938	2456	5138	13053
2641	12.547	519.238	w/o MS2:neoandrographolide	[M+H]+	20224	216180	45265	49144	81113	35729	163596	61890	31882	107384	25500	86295
2647	19.726	519.293	w/o MS2:neoandrographolide	[M+H]+	27252	58941	98045	50519	76690	76485	103254	64119	76944	87944	23402	33333
2649	17.632	519.295	w/o MS2:(2S)-2-[(2R,3S,7R,8R,8aS)-2,3,4'-trihydroxy-4,4,7,8a-tetramethyl-6'-oxospiro[2,3,4a,5,6,7-hexahydro-1H-naphthalene-8,2'-3,8-dihydrofuro[2,3-e]isoindole]-7'-yl]-3-methylbutanoic acid	[M+CH3OH+H]+	1335.93	1335.93	16780	16396	14617	18481	22524	1335.93	1335.93	13359	1335.93	1335.93
2656	1.29	521.109	w/o MS2:(3-hydroxy-4-{[(2S,3R,4S,5S,6R)-3,4,5-trihydroxy-6-(hydroxymethyl)oxan-2-yl]oxy}phenyl)methyl 4-hydroxy-3,5-dimethoxybenzoate	[M+H]+	11500	19344	597.062	597.062	10129	6805	597.062	47652	12927	597.062	5971	21476
2659	15.559	522.133	w/o MS2:karakin	[M+H]+	11562	35928	193.378	31378	14842	1934	193.378	42348	11488	193.378	17160	40340
2667	5.955	523.197	w/o MS2:3-Deoxo-3Beta-Hydroxymexicanolide 16-Enol Ether	[M+H]+	3767	376.72	376.72	376.72	376.72	376.72	376.72	376.72	3856	376.72	11404	376.72
2668	1.224	523.219	w/o MS2:(2R,3R,4S,5S,6R)-2-[[7-hydroxy-1-(4-hydroxy-3-methoxyphenyl)-3-(hydroxymethyl)-6-methoxy-1,2,3,4-tetrahydronaphthalen-2-yl]methoxy]-6-(hydroxymethyl)oxane-3,4,5-triol	[M+H]+	164478	227823	142434	155485	192732	30792	90631	221679	220783	105554	149812	124222
2672	10.162	525.213	w/o MS2:4-[(E)-3-[(2R,3R,4S,5S,6R)-3-[(2S,3R,4R)-3,4-dihydroxy-4-(hydroxymethyl)oxolan-2-yl]oxy-4,5-dihydroxy-6-(hydroxymethyl)oxan-2-yl]oxybut-1-enyl]-3,5,5-trimethylcyclohex-2-en-1-one	[M+H]+	32544	9527	108794	51764	93627	89343	203030	32983	26786	80018	11474	11527
2673	0.775	527.159	w/o MS2:maltotriose	[2M+H]+	382241	211214	13553	169858	85158	119968	8537	313710	256949	13370	239214	190789
2675	0.877	529.144	w/o MS2:(1R,2R,4S,7S,8R,9R,10S,11R,12S,13S,14R,17R,18R,19R)-8-(acetyloxy)-10,19-dihydroxy-1,9,18-trimethyl-15-oxo-16,20-dioxahexacyclo[15.3.2.0?,??.0?,??.0?,??.0??,??]docos-5-ene-5-carboxylic acid	[2M+H]+	19190	19859	18788	9996	8209	13751	10894	11099	17490	7665	6620	9615
2677	7.895	529.207	w/o MS2:(2R,7S,13R,14R,16S,19R,20S)-19-(furan-3-yl)-9,9,13,20-tetramethyl-5,12,17-trioxo-4,8,15,18-tetraoxahexacyclo[11.9.0.0?,?.0?,??.0??,??.0??,??]docosan-11-yl acetate	[M+H]+	133359	573662	2327.45	23275	169000	289093	2327.45	519680	62198	2327.45	231420	489839
2679	11.523	529.223	w/o MS2:methyl (1R,4S,4aS,7R,8S,9R)-4,8,9-triacetyloxy-7-ethenyl-1,4a,7-trimethyl-3,4,5,6,8,9,10,10a-octahydro-2H-phenanthrene-1-carboxylate	[M+H]+	64252	63406	32892	1326	29207	46718	19416	64680	58004	31201	33258	73315
2680	1.317	529.241	w/o MS2:methyl (2R)-2-(acetyloxy)-2-[(1S,3S,7R,8R,9R,12S,13R)-13-(furan-3-yl)-6,6,8,12-tetramethyl-17-methylidene-5,15-dioxo-2,14-dioxatetracyclo[7.7.1.0?,??.0?,?]heptadecan-7-yl]acetate	[M+H]+	3027.72	3027.72	112306	3027.72	3027.72	3027.72	39580	3027.72	3027.72	30277	3027.72	3027.72
2682	7.867	530.21	w/o MS2:1-[2-[3-[(2R,3R,4S,5S,6R)-6-[[(2R,3R,4R)-3,4-dihydroxy-4-(hydroxymethyl)oxolan-2-yl]oxymethyl]-3,4,5-trihydroxyoxan-2-yl]oxyprop-1-en-2-yl]-2,3-dihydro-1-benzofuran-5-yl]ethanone	[M+H]+	8586	18731	246.101	246.101	2461	19998	246.101	12501	3248	246.101	11560	12999
2685	13.741	531.239	w/o MS2:(2R,3R,6R,8R,9S,12S,13R,14R,15R,16R)-6,8,14,15-tetrahydroxy-2,6,13,16-tetramethyl-3-{[(2R,3R,4S,5S,6R)-3,4,5-trihydroxy-6-(hydroxymethyl)oxan-2-yl]oxy}-10-oxatetracyclo[7.6.1.0?,?.0??,??]hexadec-4-en-11-one	[M+H]+	842525	569635	513380	763098	1389236	282524	1078237	597943	737015	1078607	827883	1277210
2689	9.004	532.348	w/o MS2:(1S,2S,6S,9S,10S,11R,12R,13S,14S,15S,16R,18S,19S,22S,23R,25R)-6,10,19-trimethyl-24-oxa-4-azaheptacyclo[12.12.0.0?,??.0?,?.0??,??.0??,??.0??,??]hexacosane-10,12,13,14,16,22,23-heptol	[M+H]+	41830	35202	15937	79044	42272	28955	41063	39945	32289	18259	20701	14611
2691	3.571	533.179	w/o MS2:(2R,3R,4S,5S,6R)-2-[(3R)-1,7-bis(3,4-dihydroxyphenyl)heptan-3-yl]oxy-6-(hydroxymethyl)oxane-3,4,5-triol	[M+H]+	55715	216232	3116.65	44501	37032	33210	3116.65	121498	79996	3116.65	68914	31167
2697	18.287	533.255	w/o MS2:2-[(2R,4aS,8S,8aS)-8-[2-[(4aS,7R,8aR)-7-(1-carboxyethenyl)-1-hydroxy-4a-methyl-2-oxo-6,7,8,8a-tetrahydro-5H-naphthalen-1-yl]ethyl]-4a-methyl-7-oxo-1,2,3,4,8,8a-hexahydronaphthalen-2-yl]prop-2-enoic acid	[M+H]+	127233	291580	8065.46	149812	145715	84703	8065.46	316375	80655	8065.46	115605	282471
2702	17.623	533.309	w/o MS2:1,6-dihydroxy-8-(hydroxymethyl)-4,12,12,15-tetramethyl-14-[(2-methylpropanoyl)oxy]-5-oxotetracyclo[8.5.0.0?,?.0??,??]pentadeca-3,8-dien-13-yl 2-ethylbutanoate	[M+CH3OH+H]+	860.573	860.573	14500	860.573	860.573	860.573	12063	860.573	860.573	8606	860.573	860.573
2717	9.012	534.297	w/o MS2:Alpha-Ergocryptine	[M+2H]2+	84651	50466	54394	34919	21426	40059	62646	67797	92619	53100	53601	68232
2724	17.937	535.24	w/o MS2:3,6-dibenzyl-9-[(2,3-diamino-1,2-dihydroindol-3-yl)methyl]-1,4,7-triazonane-2,5,8-trione	[M+H]+	4125.64	4125.64	244755	72170	41256	70684	160945	4125.64	4125.64	221022	4125.64	4125.64
2725	19.02	535.27	w/o MS2:ANTIMYCIN A (A1 shown)	[M+H]+	261868	315120	13860	172419	194172	153461	45940	563096	765966	109480	556858	633824
2731	10.894	535.325	w/o MS2:3-[(3S,5R,10S,13R,14S,17S)-3-[(2R,3S,4R,5S,6S)-3,5-dihydroxy-4-methoxy-6-methyloxan-2-yl]oxy-14-hydroxy-10,13-dimethyl-1,2,3,4,5,6,7,8,9,11,12,15,16,17-tetradecahydrocyclopenta[a]phenanthren-17-yl]-2H-furan-5-one	[M+H]+	1798.88	1798.88	17989	1798.88	1798.88	1798.88	18397	1798.88	1798.88	22044	1798.88	1798.88
2735	14.421	536.24	w/o MS2:Gossypol	[M+H]+	12978	120.274	120.274	7030	11106	1764	120.274	7362	8868	1266	14994	1203
2740	13.897	537.25	w/o MS2:(1R,19R,20S)-19-ethenyl-18-{[(2S,3R,4S,5S,6R)-3,4,5-trihydroxy-6-(hydroxymethyl)oxan-2-yl]oxy}-17-oxa-3,13-diazapentacyclo[11.8.0.0?,??.0?,?.0??,??]henicosa-2(10),4(9),5,7,15-pentaen-14-one	[M+H]+	184096	44599	12630	73856	141060	75325	34044	87668	114842	58201	209027	151505
2747	13.918	538.258	w/o MS2:Deacetoxy(7)-7-Oxokhivorinic Acid	[M+H]+	1345420	235518	558631	601989	1125647	608172	635331	1380194	1689268	272070	1678806	600850
2748	12.207	539.266	w/o MS2:1,6-dihydroxy-8-(hydroxymethyl)-4,12,12,15-tetramethyl-13-[(2-methylpropanoyl)oxy]-5-oxotetracyclo[8.5.0.0?,?.0??,??]pentadeca-3,8-dien-14-yl (2E)-2-methylbut-2-enoate	[M+H]+	533872	242723	445409	15273	361382	444405	507599	866254	625004	898614	538807	803813
2749	9.692	539.289	w/o MS2:MUPIROCIN	[M+H]+	105579	77262	56794	268527	5679.4	280060	5679.4	493460	637376	157215	634483	441869
2750	10.398	539.319	w/o MS2:FUSIDIC ACID	[M+H]+	275664	124021	136559	12990	144874	265208	237858	225371	305494	98793	253420	215184
2760	0.785	543.133	w/o MS2:Melezitose	[M+H]+	385304	718681	925639	772926	795577	745869	811783	681692	464274	921878	261046	210625
2761	2.453	543.201	w/o MS2:methyl 2,4,10-triacetyloxy-5,9-dihydroxy-1,4a-dimethyl-7-propan-2-yl-2,3,4,9,10,10a-hexahydrophenanthrene-1-carboxylate	[M+H]+	116.492	116.492	10784	1165	116.492	116.492	14034	116.492	116.492	6106	116.492	116.492
2766	10.772	545.218	w/o MS2:methyl 3-[3,4-dihydroxy-5-(3-methylbut-2-enyl)phenyl]-2-[[4-hydroxy-3-(3-methylbut-2-enyl)phenyl]methyl]-4-methoxy-5-oxofuran-2-carboxylate	[M+H]+	181214	427338	119317	11554	366063	200194	122918	478469	374849	99904	208083	455100
2768	17.636	545.252	w/o MS2:methyl (2E)-3-[18-(acetyloxy)-7-(furan-3-yl)-17-hydroxy-1,8,15,15-tetramethyl-5-oxo-3,6,14-trioxapentacyclo[9.7.0.0?,?.0?,?.0??,??]octadecan-12-yl]prop-2-enoate	[M+H]+	142.205	142.205	27821	1422	14892	8561	21891	142.205	142.205	14214	142.205	142.205
2771	0.884	547.165	w/o MS2:[7-(hydroxymethyl)-4-methyl-1-[3,4,5-trihydroxy-6-(hydroxymethyl)oxan-2-yl]oxy-1,4a,5,6,7,7a-hexahydrocyclopenta[c]pyran-5-yl] (E)-3-(4-hydroxyphenyl)prop-2-enoate	[M+H]+	28271	30621	25261	34511	40481	22563	14611	15385	29367	15904	26684	20856
2777	12.087	547.235	w/o MS2:(2E,4E)-1-[(2R,6S,14S,22S,25R)-25-(3,3-dimethyloxiran-2-yl)-15-methyl-1,3,13,15-tetraazaheptacyclo[18.4.1.0?,?.0?,??.0?,??.0??,??.0??,??]pentacosa-7,9,11,16(21),17,19-hexaen-3-yl]hexa-2,4-dien-1-one	[M+H]+	1096820	962070	428894	313421	1362766	1383192	464944	1946917	1149700	284187	1186700	1573135
2778	15.707	547.264	w/o MS2:7,15-bis(3,4-dimethoxyphenyl)-19-oxa-4,18-diazahexacyclo[10.6.1.0?,?.0?,?.0??,??.0??,??]nonadec-8-en-12-ol	[M+H]+	3066.97	3066.97	206979	81360	66047	30670	219130	3066.97	3066.97	180226	3066.97	3066.97
2785	14.932	549.251	w/o MS2:[1a-(hydroxymethyl)-2-[3,4,5-trihydroxy-6-(hydroxymethyl)oxan-2-yl]oxy-2,5a,6,6a-tetrahydro-1bH-oxireno[5,6]cyclopenta[1,3-c]pyran-6-yl] 3,4-dimethoxybenzoate	[M+CH3OH+H]+	417267	90912	105740	156020	228899	261756	512916	187872	222520	81323	223786	210318
2787	17.743	549.286	w/o MS2:1-[2,4,6-trihydroxy-3-[7-hydroxy-2-(4-hydroxyphenyl)-3,4-dihydro-2H-chromen-4-yl]phenyl]dodecan-1-one	[M+H]+	79938	141970	1247	124423	122952	107546	124.653	105552	129090	1371	124419	203887
2796	2.896	551.19	w/o MS2:(2R,7S,13R,14R,16S,19R,20S)-19-(furan-3-yl)-9,9,13,20-tetramethyl-5,12,17-trioxo-4,8,15,18-tetraoxahexacyclo[11.9.0.0?,?.0?,??.0??,??.0??,??]docosan-11-yl acetate	[M+H]+	25866	102271	1903	349306	19030	72644	1903	177225	21553	1903	22090	160554
2797	9.394	551.228	w/o MS2:methyl (2R)-2-(acetyloxy)-2-[(1S,3S,7R,8R,9R,12S,13R)-13-(furan-3-yl)-6,6,8,12-tetramethyl-17-methylidene-5,15-dioxo-2,14-dioxatetracyclo[7.7.1.0?,??.0?,?]heptadecan-7-yl]acetate	[M+H]+	26202	241.064	241.064	241.064	241.064	241.064	241.064	2411	38676	241.064	25638	241.064
2799	23.31	551.329	w/o MS2:3-Deoxo-3Beta-Acetoxydeoxydihydrogedunin	[M+H]+	8132148	6485382	3571382	10325904	6669858	5893868	3221769	3145190	6219736	5061618	5383188	5949414
2808	9.623	552.235	w/o MS2:(2R,3R,4S,5S,6R)-2-[(E)-3-[3,5-dimethoxy-4-[(2S,3R,4S,5S,6R)-3,4,5-trihydroxy-6-(hydroxymethyl)oxan-2-yl]oxyphenyl]prop-2-enoxy]-6-(hydroxymethyl)oxane-3,4,5-triol	[M+H]+	869.109	8691	869.109	869.109	869.109	869.109	869.109	15788	869.109	869.109	869.109	11140
2809	11.184	552.237	w/o MS2:arctiin	[M+H]+	36597	62040	1101.83	29691	46217	74694	1101.83	77515	101411	11018	90109	115084
2817	12.105	553.221	w/o MS2:(1S,6R,10S,13S,14R,15R)-1,6-dihydroxy-8-(hydroxymethyl)-4,12,12,15-tetramethyl-13-[(2-methylbutanoyl)oxy]-5-oxotetracyclo[8.5.0.0?,?.0??,??]pentadeca-3,8-dien-14-yl (2E)-2-methylbut-2-enoate	[M+H]+	6860	21184	14028	36132	14813	24798	25433	17793	16920	23074	11411	39054
2818	8.999	553.275	w/o MS2:Proscillaridin	[M+H]+	69254	18741	38858	34142	8508	44841	6380	42824	23037	23890	54855	44423
2823	7.577	553.427	w/o MS2:2-(21-amino-3,20-dihydroxydocosan-2-yl)oxy-6-(hydroxymethyl)oxane-3,4,5-triol	[M+H]+	213358	322727	146887	180117	232189	217335	141420	356764	253347	100542	259520	330086
2828	10.155	555.188	w/o MS2:(1S,3R,4S,5R)-3,5-bis({[(2E)-3-(3,4-dihydroxyphenyl)prop-2-enoyl]oxy})-1,4-dihydroxycyclohexane-1-carboxylic acid	[M+H]+	1258.18	1258.18	81220	12582	26318	28405	82067	1258.18	1258.18	30730	1258.18	1258.18
2830	11.534	555.204	w/o MS2:methyl (4aS,5R,7S,7aS)-7-hydroxy-5-[3-(4-hydroxyphenyl)propanoyloxy]-7-methyl-1-[(2S,3R,4S,5S,6R)-3,4,5-trihydroxy-6-(hydroxymethyl)oxan-2-yl]oxy-4a,5,6,7a-tetrahydro-1H-cyclopenta[c]pyran-4-carboxylate	[M+Na]+	843.675	16192	843.675	8437	20884	9763	843.675	13930	31067	843.675	14366	18139
2831	7.448	555.224	w/o MS2:1,6-dihydroxy-8-(hydroxymethyl)-4,12,12,15-tetramethyl-13-[(2-methylpropanoyl)oxy]-5-oxotetracyclo[8.5.0.0?,?.0??,??]pentadeca-3,8-dien-14-yl (2E)-2-methylbut-2-enoate	[M+H]+	6913	30307	691.332	691.332	15718	12571	691.332	60016	9786	691.332	18134	50265
2832	20.185	555.302	w/o MS2:FUSIDIC ACID	[M+H]+	313621	218768	228013	906664	159089	44740	154169	91555	85435	82423	29257	38692
2834	15.925	556.196	w/o MS2:(1S,4aS,7S,7aS)-1-[(2S,3R,4S,5S,6R)-6-[[(E)-3-(3,4-dihydroxyphenyl)prop-2-enoyl]oxymethyl]-3,4,5-trihydroxyoxan-2-yl]oxy-7-hydroxy-7-methyl-4a,5,6,7a-tetrahydro-1H-cyclopenta[c]pyran-4-carboxylic acid	[M+H]+	3904.65	3904.65	229496	3904.65	63513	39046	235729	3904.65	3904.65	152580	3904.65	3904.65
2836	0.906	557.199	w/o MS2:arctiin	[M+H]+	5276	27276	123.615	1301	123.615	123.615	123.615	39472	1408	123.615	1236	15125
2844	16.977	559.272	w/o MS2:(3S,4S,5R)-4-[(2R,3R)-2,3-dihydroxy-3-[(2S,3R,5R,10R,13R,14S,17S)-2,3,14-trihydroxy-10,13-dimethyl-6-oxo-2,3,4,5,9,11,12,15,16,17-decahydro-1H-cyclopenta[a]phenanthren-17-yl]butyl]-3,5-dimethyloxolan-2-one	[M+H]+	61669.4	61669.4	2735633	616694	1101221	1063722	1499510	61669.4	61669.4	2832378	61669.4	61669.4
2848	1.037	561.102	w/o MS2:salviaflaside	[M+H]+	140.788	18903	140.788	11832	140.788	140.788	140.788	28199	1408	140.788	140.788	16232
2850	0.892	561.175	w/o MS2:2-(hydroxymethyl)-6-[5-[3-(hydroxymethyl)-5-(3-hydroxypropyl)-7-methoxy-2,3-dihydro-1-benzofuran-2-yl]-2-methoxyphenoxy]oxane-3,4,5-triol	[M+H]+	27332	29884	10761	13654	15301	14040	9949	15391	19433	2594	10911	10451
2851	25.902	561.215	w/o MS2:PUROMYCIN HYDROCHLORIDE	[M+H]+	195.227	195.227	80822	145758	113705	107988	76967	195.227	13770	98492	1952	63933
2852	14.929	561.249	w/o MS2:methyl (2R)-2-[(1S,2R,4S,9R,10R,14S,15S,17S)-17-(acetyloxy)-9-(furan-3-yl)-1-hydroxy-10,14,16,16-tetramethyl-7,18-dioxo-3,8-dioxapentacyclo[12.3.1.0?,?.0?,??.0?,??]octadecan-15-yl]-2-hydroxyacetate	[M+H]+	340437	172845	203739	210088	162427	260878	64566	448125	378356	445501	180934	233322
2854	7.023	561.272	w/o MS2:4-({5-[5-hydroxy-3-({[(2Z)-2-methylbut-2-enoyl]oxy}methyl)pentyl]-8a-(hydroxymethyl)-5,6-dimethyl-3,4,4a,5,6,7,8,8a-octahydronaphthalen-1-yl}methoxy)-4-oxobutanoic acid	[M+H]+	1480.67	1480.67	219125	50502	39644	14807	178643	1480.67	1480.67	69884	1480.67	1480.67
2855	17.932	561.295	w/o MS2:4-({5-[5-hydroxy-3-({[(2Z)-2-methylbut-2-enoyl]oxy}methyl)pentyl]-8a-(hydroxymethyl)-5,6-dimethyl-3,4,4a,5,6,7,8,8a-octahydronaphthalen-1-yl}methoxy)-4-oxobutanoic acid	[M+H]+	2116	14440	18149134	72822	5020770	10916461	18847084	196126	1400	19423552	2027	17796
2869	26.481	562.253	w/o MS2:methyl (2E)-3-[18-(acetyloxy)-7-(furan-3-yl)-17-hydroxy-1,8,15,15-tetramethyl-5-oxo-3,6,14-trioxapentacyclo[9.7.0.0?,?.0?,?.0??,??]octadecan-12-yl]prop-2-enoate	[M+H]+	1263.88	1263.88	165688	28402	31008	38105	119818	27707	12639	17416	17066	19635
2870	22.771	563.229	w/o MS2:methyl (1S,2R,4R,8R,9S,10R,13R,15R)-2-(acetyloxy)-13-(furan-3-yl)-9-(2-methoxy-2-oxoethyl)-4,8,10,12-tetramethyl-7-oxo-16-oxatetracyclo[8.6.0.0?,?.0??,??]hexadeca-5,11-diene-4-carboxylate	[M+H]+	130.162	130.162	1302	65853	47452	28603	11392	20080	61367	9367	46986	51928
2872	13.766	563.264	w/o MS2:Protoporphyrin IX	[M+Na]+	163039	121920	87341	130861	252481	123544	113411	148974	373467	185242	74000	234502
2877	1.192	565.228	w/o MS2:(1R,7S,8E,9S,14S,15S,17R)-8-ethylidene-15-(1-hydroxypropan-2-yl)-17-methyl-7-{[(2S,3R,4S,5S,6R)-3,4,5-trihydroxy-6-(hydroxymethyl)oxan-2-yl]oxy}-2,6,12-trioxatricyclo[12.2.1.0?,?]heptadec-4-ene-3,11-dione	[M+H]+	1109.26	1109.26	14891	1109.26	1109.26	1109.26	17980	1109.26	1109.26	11093	1109.26	1109.26
2880	10.152	565.246	w/o MS2:[(1R)-1-[(2S,4aR,4bS,7S,8aS)-7-hydroxy-2,4b,8,8-tetramethyl-4,4a,5,6,7,8a,9,10-octahydro-3H-phenanthren-2-yl]-2-[(2R,3R,4S,5R,6R)-3,4,5-trihydroxy-6-(hydroxymethyl)oxan-2-yl]oxyethyl] acetate	[M+H]+	1196	15900	217472	22366	81430	77628	219115	18613	1978	157158	6927	1154
2882	15.351	565.28	w/o MS2:[(1R)-1-[(2S,4aR,4bS,7S,8aS)-7-hydroxy-2,4b,8,8-tetramethyl-4,4a,5,6,7,8a,9,10-octahydro-3H-phenanthren-2-yl]-2-[(2R,3R,4S,5R,6R)-3,4,5-trihydroxy-6-(hydroxymethyl)oxan-2-yl]oxyethyl] acetate	[M+CH3OH+H]+	234724	177868	699645	341453	299885	616475	738279	657686	505575	722382	234212	634921
2886	13.49	565.404	w/o MS2:Canthaxanthin (Euglenanone)	[M+H]+	2693.51	2693.51	61170	2693.51	2693.51	2693.51	53965	2693.51	2693.51	26935	2693.51	2693.51
2890	2.2	567.206	w/o MS2:[(1aR,1bS,2S,5aS,6R,6aS)-5a-hydroxy-1a-methyl-2-[(2S,3R,4S,5S,6R)-3,4,5-trihydroxy-6-(hydroxymethyl)oxan-2-yl]oxy-1b,2,6,6a-tetrahydrooxireno[1,2]cyclopenta[4,5-b]pyran-6-yl] (2E,6S)-6-hydroxy-2,6-dimethylocta-2,7-dienoate	[M+H]+	2337.87	2337.87	27856	23379	2337.87	2337.87	44134	2337.87	2337.87	24111	2337.87	2337.87
2891	6.022	567.26	w/o MS2:3-Deacetylkhivorin	[M+H]+	179256	96544	9139	77465	49163	61729	16709	81776	183465	913.946	154259	132367
2892	8.524	567.297	w/o MS2:3-[[6-[[1,4a-dimethyl-6-methylidene-5-[2-(5-oxo-2H-furan-4-yl)ethyl]-3,4,5,7,8,8a-hexahydro-2H-naphthalen-1-yl]methoxy]-3,4,5-trihydroxyoxan-2-yl]methoxy]-3-oxopropanoic acid	[M+H]+	153795	202933	84131	88364	168414	156373	51732	235909	185463	85749	169039	215742
2900	7.458	568.234	w/o MS2:2-[(4S,5S,5aS,9aS)-4-methoxy-6,6,9a-trimethyl-5-[(2E,4E,6E)-octa-2,4,6-trienoyl]oxy-1-oxo-4,5,5a,7,8,9-hexahydro-3H-benzo[e]isoindol-2-yl]pentanedioic acid	[M+H]+	8027	1327	5076	1169	1337	5531	4504	4743	6537	1160	4801	116.04
2909	8.056	569.204	w/o MS2:methyl (1S,4aR,6S,7R,7aS)-4a,7-dihydroxy-6-[(E)-3-(4-hydroxyphenyl)prop-2-enoyl]oxy-7-methyl-1-[(2S,3R,4S,5S,6R)-3,4,5-trihydroxy-6-(hydroxymethyl)oxan-2-yl]oxy-1,5,6,7a-tetrahydrocyclopenta[c]pyran-4-carboxylate	[M+H]+	491.217	12774	132607	27831	33087	20849	59936	11229	491.217	40580	491.217	4912
2910	10.956	569.24	w/o MS2:(2S,3R,5S,9R)-2,3-dihydroxy-14-(hydroxymethyl)-5,9-dimethyl-14-{[(2S,3R,4S,5S,6R)-3,4,5-trihydroxy-6-(hydroxymethyl)oxan-2-yl]oxy}tetracyclo[11.2.1.0?,??.0?,?]hexadecane-5-carboxylic acid	[M+H]+	11991	11991	422119	11991	129593	119910	421140	11991	11991	344652	11991	11991
2911	5.91	569.275	w/o MS2:7,15-bis(3,4-dimethoxyphenyl)-19-oxa-4,18-diazahexacyclo[10.6.1.0?,?.0?,?.0??,??.0??,??]nonadec-8-en-12-ol	[M+H]+	91271	33646	1042.68	29040	23946	17371	1042.68	10427	43165	1042.68	80041	15631
2914	16.909	569.435	w/o MS2:N-[5-[[4-[4-[acetyl(hydroxy)amino]butylamino]-4-oxobutanoyl]-hydroxyamino]pentyl]-N'-(5-aminopentyl)-N'-hydroxybutanediamide	[M+H]+	211.687	211.687	117695	43800	45338	40734	136140	2117	211.687	76197	211.687	211.687
2919	17.664	571.433	w/o MS2:Podototarin	[M+H]+	78549	76452	2612.22	2612.22	2612.22	2612.22	2612.22	56832	26122	2612.22	56839	33124
2927	0.898	573.174	w/o MS2:arctiin	[M+H]+	93917	183496	141366	106103	149986	47430	158188	144403	88942	107349	15440	124066
2930	11.523	573.213	w/o MS2:ANTIMYCIN A (A1 shown)	[M+H]+	190345	183520	52958	116656	110492	146382	80365	349389	153470	88138	269150	204070
2931	14.449	573.25	w/o MS2:9-hydroxy-9-[[(E)-2-(hydroxymethyl)-3-[3-(hydroxymethyl)-6-propan-2-ylcyclohex-2-en-1-yl]prop-2-enoyl]oxymethyl]-1-oxo-6-propan-2-yl-3,5a,6,7,8,9a-hexahydro-2-benzoxepine-4-carboxylic acid	[2M+H]+	2731.42	2731.42	40550	27314	27866	30100	160509	2731.42	2731.42	170710	2731.42	2731.42
2932	16.375	573.376	w/o MS2:(2R,6R)-6-[(3R,10S,12S,13R,17R)-3-(2-carboxyacetyl)oxy-12-hydroxy-4,4,10,13,14-pentamethyl-2,3,5,6,7,11,12,15,16,17-decahydro-1H-cyclopenta[a]phenanthren-17-yl]-2-methyl-3-methylideneheptanoic acid	[M+Na]+	98747	274234	58415	281087	51720	250378	261559	348233	91841	146827	170665	278054
2943	12.104	575.229	w/o MS2:Dihydrocelastryl Diacetate	[M+H]+	1171	14027	5161	15657	20168	10956	7359	11127	12593	11215	7207	20667
2951	10.953	575.267	w/o MS2:3-[(3R,5S,10R,13R,14S,17R)-5,14-dihydroxy-10,13-dimethyl-3-[(2R,3R,4S,5S,6R)-3,4,5-trihydroxy-6-(hydroxymethyl)oxan-2-yl]oxy-2,3,4,6,7,8,9,11,12,15,16,17-dodecahydro-1H-cyclopenta[a]phenanthren-17-yl]-2H-furan-5-one	[M+H]+	463.262	463.262	707516	4633	317548	302335	316941	463.262	463.262	620780	463.262	463.262
2956	12.958	576.296	w/o MS2:GENTAMICIN SULFATE	[M+H]+	37699	37202	82297	48541	50435	73472	193351	57058	48859	72233	20682	44357
2961	13.765	577.244	w/o MS2:Pantethine	[M+H]+	232822	183998	142720	215491	392020	190596	77255	227827	355763	172059	108354	358794
2963	17.627	577.279	w/o MS2:methyl 5,6-diacetyloxy-10-hydroxy-2,4b,7,7,10a,12a-hexamethyl-12-methylidene-1,4,8-trioxo-4a,5,6,6a,9,10,10b,11-octahydronaphtho[1,2-h]isochromene-2-carboxylate	[M+CH3OH+H]+	18483.7	18483.7	766407	454918	508369	877731	252859	18483.7	18483.7	184837	18483.7	18483.7
2971	1.023	579.172	w/o MS2:5,7-dihydroxy-2-(4-hydroxyphenyl)-6-[(2S,3R,4R,5S,6R)-3,4,5-trihydroxy-6-(hydroxymethyl)oxan-2-yl]-8-[(2S,3R,4R,5R,6S)-3,4,5-trihydroxy-6-methyloxan-2-yl]chromen-4-one// apigenin 7-rutenoside	[M+H]+	17225	8440	1153	1343	4504	6367	8083	7377	11527	1347	22087	7004
2973	24.736	579.223	w/o MS2:(3S,4S)-5-[(3S,4S)-4,10-dihydroxy-7,9-dimethoxy-3-methyl-3,4-dihydro-1H-benzo[g]isochromen-5-yl]-7,9-dimethoxy-3-methyl-3,4-dihydro-1H-benzo[g]isochromene-4,10-diol	[M+H]+	24407	22180	210.475	32634	94143	42046	2105	198374	64537	25111	99854	191962
2988	1.493	585.217	w/o MS2:9-(4-hydroxy-3,5-dimethoxyphenyl)-4-[3,4,5-trihydroxy-6-(hydroxymethyl)oxan-2-yl]oxy-5a,6,8a,9-tetrahydro-5H-[2]benzofuro[6,5-f][1,3]benzodioxol-8-one	[M+H]+	1680.47	1680.47	25194	72168	1680.47	1680.47	23591	1680.47	1680.47	16805	1680.47	1680.47
2989	9.584	585.235	w/o MS2:7,15-bis(3,4-dimethoxyphenyl)-19-oxa-4,18-diazahexacyclo[10.6.1.0?,?.0?,?.0??,??.0??,??]nonadec-8-en-12-ol	[M+H]+	4908.6	4908.6	70434	4908.6	4908.6	4908.6	49086	4908.6	4908.6	84559	4908.6	4908.6
2995	18.619	585.451	Unknown//antheraxanthin	[M+H]+	104874	457.792	457.792	14051	36012	4578	457.792	457.792	87183	457.792	73076	457.792
2996	10.966	586.206	w/o MS2:5-methoxy-3-methyl-4-[(2S,3R,4S,5S,6R)-3,4,5-trihydroxy-6-[[(2R,3R,4S,5S,6R)-3,4,5-trihydroxy-6-(hydroxymethyl)oxan-2-yl]oxymethyl]oxan-2-yl]oxy-3H-benzo[f][2]benzofuran-1-one	[M+H]+	102065	96799	26830	38314	81121	76899	15502	91015	108324	33225	59192	51538
2997	10.158	587.214	w/o MS2:[(2R,3R,4R,5R,6S)-4,5-dihydroxy-6-methyl-2-[[(2R,3S,4S,5R,6S)-3,4,5-trihydroxy-6-[(E)-3-phenylprop-2-enoyl]oxyoxan-2-yl]methoxy]oxan-3-yl] (E)-3-phenylprop-2-enoate	[M+CH3OH+H]+	809.447	809.447	39120	10222	8094	10568	65848	809.447	809.447	14970	809.447	809.447
2998	16.975	587.267	w/o MS2:Cymarine	[M+H]+	14.5718	14.5718	498440	146	91625	177778	326754	14.5718	14.5718	519467	14.5718	14.5718
3002	0.892	589.171	w/o MS2:genipin 1-gentiobioside	[M+CH3OH+H]+	39420	38589	131853	57312	72611	62056	118508	32523	24605	105397	28472	19585
3003	1.012	589.172	w/o MS2:methyl (4S,5E,6S)-5-ethylidene-4-[2-oxo-2-[(2S,3R,4S,5S,6R)-3,4,5-trihydroxy-6-(hydroxymethyl)oxan-2-yl]oxyethyl]-6-[(2S,3R,4S,5S,6R)-3,4,5-trihydroxy-6-(hydroxymethyl)oxan-2-yl]oxy-4H-pyran-3-carboxylate	[M+H]+	548.525	8803	147116	22320	36275	28526	41215	14853	548.525	47134	548.525	5485
3004	25.798	589.215	w/o MS2:thielavin B	[M+H]+	3755	4309	49806	35621	86235	63525	41664	48342	27944	37378	35486	13944
3005	15.707	589.245	w/o MS2:Convallatoxin	[M+H]+	326.778	326.778	214219	78561	3268	74539	224966	326.778	326.778	200266	326.778	326.778
3009	17.928	589.28	w/o MS2:(1S,2R,4S,9R,10R,14S,15S,17S)-9-(furan-3-yl)-1-hydroxy-15-[(1R)-1-hydroxy-2-methoxy-2-oxoethyl]-10,14,16,16-tetramethyl-7,18-dioxo-3,8-dioxapentacyclo[12.3.1.0?,?.0?,??.0?,??]octadecan-17-yl 2-methylpropanoate	[M+H]+	9439.33	9439.33	521996	199394	94393	189078	331553	9439.33	9439.33	496741	9439.33	9439.33
3014	15.332	591.26	w/o MS2:3-[(3R,5S,10R,13R,14S,17R)-5,14-dihydroxy-10,13-dimethyl-3-[(2R,3R,4S,5S,6R)-3,4,5-trihydroxy-6-(hydroxymethyl)oxan-2-yl]oxy-2,3,4,6,7,8,9,11,12,15,16,17-dodecahydro-1H-cyclopenta[a]phenanthren-17-yl]-2H-furan-5-one	[M+H]+	177793	30553	8890	166488	162747	80424	23101	20103	142519	13381	217632	176674
3020	11.996	591.261	w/o MS2:methyl (4S,5Z,6S)-4-[2-[[(1S,2R,3R,5R)-5-(1,3-dihydroxypropan-2-yl)-3-hydroxy-2-methylcyclopentyl]methoxy]-2-oxoethyl]-5-ethylidene-6-[(2S,3R,4S,5S,6R)-3,4,5-trihydroxy-6-(hydroxymethyl)oxan-2-yl]oxy-4H-pyran-3-carboxylate	[M+H]+	202816	247976	387174	200928	225769	434192	402870	578944	440387	400172	387374	270388
3032	17.624	592.271	w/o MS2:(1S,2R,4S,9R,10R,14S,15S,17S)-9-(furan-3-yl)-1-hydroxy-15-[(1R)-1-hydroxy-2-methoxy-2-oxoethyl]-10,14,16,16-tetramethyl-7,18-dioxo-3,8-dioxapentacyclo[12.3.1.0?,?.0?,??.0?,??]octadecan-17-yl propanoate	[M+CH3OH+H]+	982.947	982.947	881473	9829	274057	462254	909019	982.947	982.947	779374	982.947	982.947
3033	1.093	592.334	w/o MS2:Cevadine	[M+CH3OH+H]+	2193.83	2193.83	29786	2193.83	2193.83	2193.83	40034	2193.83	2193.83	21938	2193.83	2193.83
3037	1.235	593.188	w/o MS2:5-hydroxy-3-(4-methoxyphenyl)-7-[3,4,5-trihydroxy-6-[(3,4,5-trihydroxy-6-methyloxan-2-yl)oxymethyl]oxan-2-yl]oxychromen-4-one//decuroside III	[M+H]+	489486	373125	563265	371418	541149	536576	606229	369238	542060	529906	525102	366012
3049	14.905	593.292	w/o MS2:3-[(Z)-5-[6-hydroxy-5,5,8a-trimethyl-2-methylidene-3-[3,4,5-trihydroxy-6-(hydroxymethyl)oxan-2-yl]oxy-3,4,4a,6,7,8-hexahydro-1H-naphthalen-1-yl]-3-methylpent-2-enoxy]-3-oxopropanoic acid	[M+CH3OH+H]+	23265630	5890826	11587981	13188452	12709788	13659339	13870170	13247769	11406560	14207838	11419564	12793058
3053	18.735	593.427	w/o MS2:Podototarin	[M+H]+	23354	31127	8686	12733	18635	7353	13242	10007	19124	10907	24612	5623
3080	0.991	595.166	w/o MS2:8-[4,5-dihydroxy-6-(hydroxymethyl)-3-[3,4,5-trihydroxy-6-(hydroxymethyl)oxan-2-yl]oxyoxan-2-yl]-5,7-dihydroxy-2-(4-hydroxyphenyl)chromen-4-one	[M+H]+	71216	37042	69451	88766	82971	84022	34778	95989	128635	39289	49389	75508
3083	1.315	595.203	w/o MS2:methyl (1S,4aS,7aS)-7-(hydroxymethyl)-1-[(2S,3R,4S,5S,6R)-3,4,5-trihydroxy-6-[[(E)-3-(4-hydroxy-3,5-dimethoxyphenyl)prop-2-enoyl]oxymethyl]oxan-2-yl]oxy-1,4a,5,7a-tetrahydrocyclopenta[c]pyran-4-carboxylate	[2M+H]+	2393	86432	96610	41720	102280	79693	55689	132498	13856	76751	2785	40659
3085	12.163	595.255	w/o MS2:6-(furan-3-yl)-12,16,21-trihydroxy-7,15-dimethyl-9-oxo-3,17,19-trioxaheptacyclo[9.9.3.0?,??.0?,?.0?,?.0??,??.0??,??]tricosan-14-yl 2-methylbutanoate	[M+H]+	773093	1281022	198962	1190257	768406	1213812	469535	780160	2174746	218836	986993	1483924
3103	10.956	597.236	w/o MS2:(1S,2R,4S,9R,10R,14S,15S,17S)-9-(furan-3-yl)-1-hydroxy-15-[(1R)-1-hydroxy-2-methoxy-2-oxoethyl]-10,14,16,16-tetramethyl-7,18-dioxo-3,8-dioxapentacyclo[12.3.1.0?,?.0?,??.0?,??]octadecan-17-yl propanoate	[M+Na]+	893.765	893.765	1762839	8938	616863	581167	1720345	893.765	893.765	1410102	893.765	893.765
3106	16.467	597.377	w/o MS2:Astaxanthin	[M+H]+	13046	10519	2649	6899	10906	1347	9476	10907	9416	3522	4258	9610
3115	9.002	598.317	w/o MS2:5-[[4-[5-[[4-[5-[acetyl(hydroxy)amino]pentylamino]-4-oxobutanoyl]-hydroxyamino]pentylamino]-4-oxobutanoyl]-hydroxyamino]pentanoic acid	[M+H]+	17955	43593	115.312	4332	29586	20867	1153	34819	45236	115.312	38889	23958
3118	7.454	599.249	w/o MS2:(1'S,2'S,3S,3'S,7'R,8'R,9'S,13'R)-8'-(acetyloxy)-2,2,2',9',13'-pentamethyl-6',16'-dimethylidene-6,11',15'-trioxo-10',14',17'-trioxaspiro[oxane-3,5'-pentacyclo[7.6.1.1?,??.0?,??.0?,?]heptadecane]-3'-yl (2E)-2-methylbut-2-enoate	[M+H]+	131.544	25452	3512	131.544	9509	13996	2302	14061	2457	131.544	1315	23547
3125	1.5	601.191	w/o MS2:(3S,4S)-5-[(3S,4S)-4,10-dihydroxy-7,9-dimethoxy-3-methyl-3,4-dihydro-1H-benzo[g]isochromen-5-yl]-7,9-dimethoxy-3-methyl-3,4-dihydro-1H-benzo[g]isochromene-4,10-diol	[M+H]+	4671.62	4671.62	49956	4671.62	4671.62	4671.62	74029	4671.62	4671.62	46716	4671.62	4671.62
3129	25.915	603.22	w/o MS2:lucidin 3-O-beta-primveroside	[M+H]+	497.754	497.754	4978	497.754	497.754	497.754	5788	497.754	497.754	8150	497.754	497.754
3133	10.607	603.337	w/o MS2:4,15,26-trihydroxy-1-oxa-4,9,15,20,26,31-hexazacyclotritriacontane-5,8,16,19,27,30-hexone	[M+H]+	56728	51564	80284	174916	41288	115463	76578	176330	113263	110061	108499	62067
3137	17.66	604.269	w/o MS2:(1S,2S,3R,4S,7R,10S,12R,15S)-4,12-bis(acetyloxy)-1,9,15-trihydroxy-10,14,17,17-tetramethyl-11-oxo-6-oxatetracyclo[11.3.1.0?,??.0?,?]heptadec-13-en-2-yl benzoate	[M+H]+	2103.51	2103.51	46365	31783	28394	21035	61197	2103.51	2103.51	42771	2103.51	2103.51
3138	20.447	604.47	w/o MS2:(1R,6R,10S,11R,13S,15R)-1,6-dihydroxy-8-(hydroxymethyl)-4,12,12,15-tetramethyl-5-oxotetracyclo[8.5.0.0?,?.0??,??]pentadeca-3,8-dien-13-yl hexadecanoate	[M+H]+	117.829	117.829	77234	1178	1196	117.829	64803	117.829	117.829	49840	117.829	117.829
3139	25.844	605.234	w/o MS2:3-[[6-[[1,4a-dimethyl-6-methylidene-5-[2-(5-oxo-2H-furan-4-yl)ethyl]-3,4,5,7,8,8a-hexahydro-2H-naphthalen-1-yl]methoxy]-3,4,5-trihydroxyoxan-2-yl]methoxy]-3-oxopropanoic acid	[M+H]+	4756	2530	461151	375123	287283	407759	566005	51673	930558	160699	220918	949458
3143	17.932	605.275	w/o MS2:6-(furan-3-yl)-6,8,12,16,21-pentahydroxy-7,15-dimethyl-9-oxo-3,17,19-trioxaheptacyclo[9.9.3.0?,??.0?,?.0?,?.0??,??.0??,??]tricosan-14-yl 2-methylbutanoate	[M+CH3OH+H]+	3406.8	3406.8	241369	75697	34068	67206	144371	3406.8	3406.8	127921	3406.8	3406.8
3147	22.951	607.254	w/o MS2:Bilirubin	[M+H]+	1238.28	1238.28	61448	13774	19886	12383	76604	1238.28	1238.28	73893	1238.28	1238.28
3163	17.621	607.275	w/o MS2:3-[(1R,3S,5S,10R,11R,13R,14S,17R)-1,5,11,14-tetrahydroxy-10-(hydroxymethyl)-13-methyl-3-[(2R,3S,4S,5R,6R)-3,4,5-trihydroxy-6-methyloxan-2-yl]oxy-2,3,4,6,7,8,9,11,12,15,16,17-dodecahydro-1H-cyclopenta[a]phenanthren-17-yl]-2H-furan-5-one	[M+H]+	11103	11103	152771	138999	116927	123140	144171	11103	11103	111030	11103	11103
3167	16.993	607.292	w/o MS2:Lappaconitine	[M+H]+	422262	1355668	209689	8627	806581	766114	409386	1750675	241176	363062	265465	788361
3177	0.905	609.182	w/o MS2:Diosmin	[M+H]+	57135	10625	241.585	8696	16723	12944	5356	12257	37402	2416	31243	10155
3178	1.121	609.183	Unknown//diosmetin rutenoside	[M+H]+	803374	483291	511748	822909	662904	954146	679741	1014488	979766	500514	1709216	1288690
3179	12	609.27	w/o MS2:3-[(Z)-5-[6-hydroxy-5,5,8a-trimethyl-2-methylidene-3-[3,4,5-trihydroxy-6-(hydroxymethyl)oxan-2-yl]oxy-3,4,4a,6,7,8-hexahydro-1H-naphthalen-1-yl]-3-methylpent-2-enoxy]-3-oxopropanoic acid	[M+H]+	1737123	1559966	2121818	1489308	1508161	2835743	3140372	3556290	2457638	2862402	2296064	1859320
3192	17.932	609.278	w/o MS2:Reserpine	[M+CH3OH+H]+	379.334	379.334	73430	3793	21492	16755	75531	379.334	379.334	70615	379.334	379.334
3210	1.117	611.195	Unknown//hesperidin	[M+CH3OH+H]+	53460	69994	212800	94538	179611	69900	108118	60164	34413	133799	28293	87292
3211	1.222	611.196	w/o MS2:5-hydroxy-2-(3-hydroxy-4-methoxyphenyl)-7-[(2S,3R,4S,5S,6R)-3,4,5-trihydroxy-6-[[(2R,3R,4R,5R,6S)-3,4,5-trihydroxy-6-methyloxan-2-yl]oxymethyl]oxan-2-yl]oxy-2,3-dihydrochromen-4-one	[M+H]+	127.229	7619	93588	24840	7896	11598	53948	19789	1272	7638	127.229	6139
3212	22.941	611.249	w/o MS2:(1S,2R,4S,9R,10R,14S,15S,17S)-9-(furan-3-yl)-1-hydroxy-15-[(1R)-1-hydroxy-2-methoxy-2-oxoethyl]-10,14,16,16-tetramethyl-7,18-dioxo-3,8-dioxapentacyclo[12.3.1.0?,?.0?,??.0?,??]octadecan-17-yl 2-methylpropanoate	[M+H]+	46015	30476	29396	160031	88721	117240	10051	250355	197145	33528	107400	200113
3248	20.96	613.262	w/o MS2:methyl (4S,5Z,6S)-4-[2-[[(1S,2R,3R,5R)-5-(1,3-dihydroxypropan-2-yl)-3-hydroxy-2-methylcyclopentyl]methoxy]-2-oxoethyl]-5-ethylidene-6-[(2S,3R,4S,5S,6R)-3,4,5-trihydroxy-6-(hydroxymethyl)oxan-2-yl]oxy-4H-pyran-3-carboxylate	[M+H]+	1444.86	1444.86	14449	1444.86	1444.86	1444.86	23152	1444.86	1444.86	28440	1444.86	1444.86
3285	0.98	617.144	w/o MS2:4-(3,4-dihydroxyphenyl)-7-methoxy-5-[(2S,3R,4S,5S,6R)-3,4,5-trihydroxy-6-[[(2S,3R,4S,5R)-3,4,5-trihydroxyoxan-2-yl]oxymethyl]oxan-2-yl]oxychromen-2-one	[M+Na]+	6543	37839	33396	35700	39845	21365	17407	53628	36783	16229	25547	22143
3286	0.891	617.15	w/o MS2:5-[6-[[3,4-dihydroxy-4-(hydroxymethyl)oxolan-2-yl]oxymethyl]-3,4,5-trihydroxyoxan-2-yl]oxy-4-(3,4-dihydroxyphenyl)-7-methoxychromen-2-one	[M+H]+	61061	34375	6821	33916	58755	29481	26837	57405	74870	14661	51364	36441
3287	0.776	617.167	w/o MS2:(3S,4S)-5-[(3S,4S)-4,10-dihydroxy-7,9-dimethoxy-3-methyl-3,4-dihydro-1H-benzo[g]isochromen-5-yl]-7,9-dimethoxy-3-methyl-3,4-dihydro-1H-benzo[g]isochromene-4,10-diol	[M+H]+	22421	26354	58803	35554	26120	19735	41973	24679	19885	62911	28005	21272
3294	0.894	619.164	w/o MS2:eriocitrin	[M+H]+	28315	6148	300.136	6185	8547	4308	300.136	3001	41806	300.136	28764	300.136
3303	26.475	621.235	w/o MS2:(1'S,2'S,3S,3'S,7'R,8'R,9'S,13'R)-8'-(acetyloxy)-2,2,2',9',13'-pentamethyl-6',16'-dimethylidene-6,11',15'-trioxo-10',14',17'-trioxaspiro[oxane-3,5'-pentacyclo[7.6.1.1?,??.0?,??.0?,?]heptadecane]-3'-yl (2E)-2-methylbut-2-enoate	[M+H]+	96002	96296	258141	133456	514719	168346	355140	77593	77065	58636	199302	258835
3308	17.932	621.316	w/o MS2:(2R,3R,4S,5R,6R)-2-[[7-[(2R,3R,4R,5S)-3,4-dihydroxy-5-(hydroxymethyl)oxolan-2-yl]oxy-2-ethenyl-2,4b,8,8-tetramethyl-4,4a,5,6,7,8a,9,10-octahydro-3H-phenanthren-3-yl]oxy]-6-methyloxane-3,4,5-triol	[M+CH3OH+H]+	15073	8745	21298876	1302007	5813891	12595548	21788988	189160	28195	21794356	3928	4528
3323	25.128	623.249	w/o MS2:[(2R,3S,4S,5R,6R)-6-[1,7-bis(4-hydroxyphenyl)-5-oxoheptan-3-yl]oxy-3,4,5-trihydroxyoxan-2-yl]methyl (E)-3-(4-hydroxyphenyl)prop-2-enoate	[M+H]+	42856	68119	347863	501077	518990	358050	137520	150057	356580	438020	379358	510953
3328	8.439	623.362	w/o MS2:dehydroxynocardamine	[M+H]+	2548.17	2548.17	359798	2548.17	28088	25482	374428	2548.17	2548.17	183516	2548.17	2548.17
3329	23.295	623.387	w/o MS2:Roccellic Acid	[M+H]+	454667	714480	287414	227588	358249	683935	433407	788976	238972	332399	204080	396961
3335	10.857	625.301	w/o MS2:desmethylenylnocardamine	[M+H]+	9951	20633	124.178	3491	1242	124.178	124.178	15320	28682	124.178	16384	6441
3337	7.95	625.319	w/o MS2:4,15,26-trihydroxy-1-oxa-4,9,15,20,26,31-hexazacyclotritriacontane-5,8,16,19,27,30-hexone	[M+H]+	81709	76014	1329.61	85199	49199	42152	13296	105841	59040	1329.61	28306	75821
3345	15.72	627.21	w/o MS2:[(2R,3S,4S,5R,6S)-6-[3,5-dihydroxy-4-[3-(4-hydroxyphenyl)propanoyl]phenoxy]-3,4,5-trihydroxyoxan-2-yl]methyl 3,4,5-trihydroxybenzoate	[M+H]+	2881.07	2881.07	63040	2881.07	2881.07	2881.07	69153	2881.07	2881.07	28811	2881.07	2881.07
3364	15.926	629.225	w/o MS2:(15S,16Z,17S)-16-ethylidene-4-hydroxy-15-{[(2S,3R,4S,5S,6R)-3,4,5-trihydroxy-6-(hydroxymethyl)oxan-2-yl]oxy}-2,10,14,20-tetraoxatetracyclo[21.2.2.1?,?.0??,??]octacosa-1(25),3(28),4,6,12,23,26-heptaene-11,19-dione	[M+H]+	70213.1	70213.1	2492086	70213.1	875185	702131	2550290	70213.1	70213.1	1964558	70213.1	70213.1
3377	0.893	631.165	w/o MS2:Diosmin	[M+Na]+	27784	2971	146.473	1465	4322	146.473	146.473	3140	19833	146.473	16386	146.473
3383	0.977	633.123	w/o MS2:apigenin 6,8-digalactoside	[M+H]+	44663	82315	229905	74125	76761	84609	147475	102500	51410	116875	41458	122086
3385	14.448	633.27	w/o MS2:(2R,3R,4S,5S,6R)-2-[1,7-bis(4-hydroxyphenyl)heptan-3-yloxy]-6-[[(2S,3R,4R)-3,4-dihydroxy-4-(hydroxymethyl)oxolan-2-yl]oxymethyl]oxane-3,4,5-triol	[M+H]+	2465.79	2465.79	26036	2465.79	2465.79	2465.79	43474	2465.79	2465.79	24658	2465.79	2465.79
3387	12.596	633.397	w/o MS2:(1S,2R,4aS,6aR,6bR,10S,12aR,14bS)-1,2,6b,9,9,12a-hexamethyl-10-[(2R,3R,4S,5S,6R)-3,4,5-trihydroxy-6-methyloxan-2-yl]oxy-2,3,4,5,6,6a,7,8,8a,10,11,12,13,14b-tetradecahydro-1H-picene-4a,6a-dicarboxylic acid	[M+H]+	115.542	2339	36333	7008	1298	1364	100168	2348	115.542	13570	115.542	1155
3394	0.892	635.138	w/o MS2:eriocitrin	[M+H]+	136337	15721	60635	75901	81520	58203	64676	28211	135174	53405	103288	19050
3399	15.287	635.289	w/o MS2:rescinnamine	[M+CH3OH+H]+	114.879	114.879	4393348	3277453	2648788	4479520	7635634	114.879	114.879	10213700	114.879	1149
3416	24.733	639.244	w/o MS2:[(2S,3R,4R,5R,6S)-2-[[(1aS,1bS,2S,5aR,6S,6aS)-1a-(hydroxymethyl)-2-[(2S,3R,4S,5S,6R)-3,4,5-trihydroxy-6-(hydroxymethyl)oxan-2-yl]oxy-2,5a,6,6a-tetrahydro-1bH-oxireno[5,6]cyclopenta[1,3-c]pyran-6-yl]oxy]-4,5-dihydroxy-6-methyloxan-3-yl] (E)-3-phenylprop-2-enoate	[M+H]+	49790	73594	6462	58714	163647	33487	7890	274325	400378	53904	228118	295574
3419	13.081	639.319	w/o MS2:deferrioxamine E	[M+H]+	11307	20387	78182	679.984	45303	43581	82904	34344	25738	81769	6800	30800
3420	11.754	639.402	w/o MS2:deferrioxamine E	[M+H]+	718.122	718.122	8478	718.122	718.122	718.122	14159	718.122	718.122	7181	718.122	718.122
3438	17.646	643.29	w/o MS2:6-(furan-3-yl)-6,8,12,16,21-pentahydroxy-7,15-dimethyl-9-oxo-3,17,19-trioxaheptacyclo[9.9.3.0?,??.0?,?.0?,?.0??,??.0??,??]tricosan-14-yl 2-methylbutanoate	[M+Na]+	8899.73	8899.73	374687	168079	141985	88997	287419	8899.73	8899.73	193519	8899.73	8899.73
3443	3.286	645.189	w/o MS2:5-[4,5-dihydroxy-6-(hydroxymethyl)-3-(3,4,5-trihydroxyoxan-2-yl)oxyoxan-2-yl]oxy-7,8-dimethoxy-3-(4-methoxyphenyl)chromen-4-one	[M+H]+	42833	109553	241.686	2417	60036	53872	241.686	122219	90539	241.686	76646	112772
3446	15.72	645.22	w/o MS2:[(2R,3S,4S,5R,6R)-6-[1,7-bis(4-hydroxyphenyl)-5-oxoheptan-3-yl]oxy-3,4,5-trihydroxyoxan-2-yl]methyl (E)-3-(4-hydroxyphenyl)prop-2-enoate	[M+H]+	4355.56	4355.56	78958	4355.56	4355.56	4355.56	69107	4355.56	4355.56	43556	4355.56	4355.56
3453	0.891	647.138	w/o MS2:Diosmin	[M+H]+	162345	153291	197095	229199	186076	200871	274857	152482	192937	260771	140911	120184
3476	15.694	651.283	w/o MS2:GAMBOGIC ACID	[M+H]+	978.8	978.8	16459	978.8	978.8	978.8	29253	978.8	978.8	9788	978.8	978.8
3487	2.553	653.128	w/o MS2:[(2S,3R,4S,5S,6R)-4,5-dihydroxy-6-[[(E)-3-(4-hydroxyphenyl)prop-2-enoyl]oxymethyl]-2-(3,4,5-trihydroxybenzoyl)oxyoxan-3-yl] 3,4,5-trihydroxybenzoate	[M+H]+	32361	48137	122706	72153	66993	63237	90024	60982	40179	115187	23474	49799
3490	16.041	653.182	w/o MS2:[2-[(2S,3R,4S,5S,6R)-3,4,5-trihydroxy-6-(hydroxymethyl)oxan-2-yl]oxyphenyl]methyl 6-hydroxy-2-methoxy-3-[3,4,5-trihydroxy-6-(hydroxymethyl)oxan-2-yl]oxybenzoate	[M+H]+	6987	38056	698.674	63757	26557	13272	698.674	115964	18687	698.674	30092	109853
3505	9.111	655.314	w/o MS2:Tetrahydrogambogic Acid	[M+H]+	1387.57	1387.57	13876	1387.57	1387.57	1387.57	45689	1387.57	1387.57	17436	1387.57	1387.57
3511	15.69	657.269	w/o MS2:rescinnamine	[M+H]+	340.883	340.883	35721	12249	3409	340.883	86852	340.883	340.883	61708	340.883	340.883
3512	10.647	657.361	w/o MS2:(3S,4S,6aR,6bS,8R,8aR,12aS,14bR)-8-hydroxy-4,6a,6b,11,11,14b-hexamethyl-3-[(2S,3R,4S,5R)-3,4,5-trihydroxyoxan-2-yl]oxy-1,2,3,4a,5,6,7,8,9,10,12,12a,14,14a-tetradecahydropicene-4,8a-dicarboxylic acid	[M+H]+	602.596	6026	602.596	602.596	602.596	602.596	602.596	14582	602.596	602.596	602.596	9580
3514	12.86	657.433	w/o MS2:(2S,3R,4S,5R)-2-{[2-hydroxy-22-(2-hydroxypropan-2-yl)-3,8,8,17,19-pentamethyl-23,24-dioxaheptacyclo[19.2.1.0?,??.0?,??.0?,??.0?,??.0??,??]tetracos-4-en-9-yl]oxy}oxane-3,4,5-triol	[M+H]+	114.726	114.726	20163	114.726	1147	114.726	40776	114.726	114.726	77786	114.726	114.726
3520	1.61	659.275	w/o MS2:Fucoxanthin	[M+H]+	318.203	318.203	30630	318.203	5396	9734	31823	3182	318.203	25839	318.203	318.203
3521	7.007	659.363	w/o MS2:(2E)-6-{13,17-dihydroxy-7,7,12,16-tetramethyl-6-[(3,4,5-trihydroxyoxan-2-yl)oxy]pentacyclo[9.7.0.0?,?.0?,?.0??,??]octadecan-15-yl}-2-methylhept-2-enoic acid	[M+H]+	1348.7	1348.7	108780	19115	13487	16906	94818	1348.7	1348.7	55178	1348.7	1348.7
3523	18.754	659.426	w/o MS2:Fucoxanthin	[M+CH3OH+H]+	25490	21177	129.851	1299	129.851	129.851	129.851	15412	10273	129.851	25842	15364
3524	0.907	661.214	w/o MS2:[(2S,3R,4R,5R,6S)-2-[[(1aS,1bS,2S,5aR,6S,6aS)-1a-(hydroxymethyl)-2-[(2S,3R,4S,5S,6R)-3,4,5-trihydroxy-6-(hydroxymethyl)oxan-2-yl]oxy-2,5a,6,6a-tetrahydro-1bH-oxireno[5,6]cyclopenta[1,3-c]pyran-6-yl]oxy]-4,5-dihydroxy-6-methyloxan-3-yl] (E)-3-phenylprop-2-enoate	[M+H]+	8436	14290	640.617	640.617	640.617	640.617	640.617	12668	13408	640.617	6406	640.617
3525	24.86	661.302	w/o MS2:[(2R,3S,4S,5R,6R)-6-[1,7-bis(4-hydroxyphenyl)-5-oxoheptan-3-yl]oxy-3,4,5-trihydroxyoxan-2-yl]methyl (E)-3-(4-hydroxyphenyl)prop-2-enoate	[M+H]+	228.392	228.392	24891	22072	12345	14108	26547	16341	2284	80637	47984	35323
3526	18.702	661.338	w/o MS2:(2E,6E,10E)-14-[(2S,3R,4S,5S,6R)-4,5-dihydroxy-6-(hydroxymethyl)-3-[(2S,3R,4S,5S,6R)-3,4,5-trihydroxy-6-(hydroxymethyl)oxan-2-yl]oxyoxan-2-yl]oxy-4-hydroxy-2,6,10,14-tetramethylhexadeca-2,6,10,15-tetraenoic acid	[M+H]+	127.505	15410	127.505	127.505	1275	127.505	127.505	32902	127.505	127.505	127.505	25522
3533	19.245	663.354	w/o MS2:ACARBOSE	[M+H]+	28964	254274	396104	248643	260541	258017	402371	175769	84429	379755	77050	123249
3539	26.052	667.276	w/o MS2:[(2R,3S,4S,5R,6R)-6-[1,7-bis(4-hydroxyphenyl)-5-oxoheptan-3-yl]oxy-3,4,5-trihydroxyoxan-2-yl]methyl (E)-3-(3,4-dimethoxyphenyl)prop-2-enoate	[M+H]+	83.7961	83.7961	53396	60538	21204	16652	106410	83.7961	83.7961	838	83.7961	83.7961
3552	8.866	669.293	w/o MS2:Garcinolic Acid	[M+H]+	27441	25671	245.346	2453	11421	19939	245.346	9359	72791	245.346	34418	53235
3563	11.034	671.377	w/o MS2:(2S,3S,4S,5R,6R)-6-[[(3S,6aR,6bS,8aS,14bR)-8a-carboxy-4-(hydroxymethyl)-4,6a,6b,11,11,14b-hexamethyl-1,2,3,4a,5,6,7,8,9,10,12,12a,14,14a-tetradecahydropicen-3-yl]oxy]-3,4,5-trihydroxyoxane-2-carboxylic acid	[M+H]+	59910	95449	506250	325936	170318	268462	300395	176706	106028	472632	93867	90618
3565	17.437	671.45	w/o MS2:(3S,6R,9S,12R,15S,18R)-3-butan-2-yl-4,10,16-trimethyl-6,9,12,15,18-penta(propan-2-yl)-1,7,13-trioxa-4,10,16-triazacyclooctadecane-2,5,8,11,14,17-hexone	[M+H]+	15771	34309	50364	39347	84729	64259	94319	110128	44114	42161	8327	80275
3570	5.11	673.156	w/o MS2:(1R,21S,23R)-6,7,8,11,12,13,22,23-octahydroxy-3,16-dioxo-2,17,20-trioxatetracyclo[17.3.1.0?,?.0??,??]tricosa-4(9),5,7,10(15),11,13-hexaen-21-yl 3,4,5-trihydroxybenzoate	[M+H]+	1400.9	22193	1400.9	1400.9	1400.9	1400.9	1400.9	38964	1400.9	1400.9	1400.9	14009
3582	0.899	677.184	w/o MS2:6-hydroxy-3-[3-hydroxy-4-[3,4,5-trihydroxy-6-[[3,4,5-trihydroxy-6-(hydroxymethyl)oxan-2-yl]oxymethyl]oxan-2-yl]oxyphenyl]-5,7-dimethoxychromen-4-one	[M+H]+	33982	113477	3398.17	63031	52349	35392	3398.17	102461	49071	3398.17	67371	83893
3596	4.034	682.078	w/o MS2:DIHYDROSTREPTOMYCIN SULFATE	[M+H]+	18671	52710	428.819	428.819	4288	10292	428.819	41688	25713	428.819	28618	35873
3598	4.585	683.27	w/o MS2:2-[4-[(3S,3aR,6S,6aR)-6-[3-methoxy-4-[3,4,5-trihydroxy-6-(hydroxymethyl)oxan-2-yl]oxyphenyl]-1,3,3a,4,6,6a-hexahydrofuro[3,4-c]furan-3-yl]-2-methoxyphenoxy]-6-(hydroxymethyl)oxane-3,4,5-triol	[M+H]+	117.066	117.066	11846	117.066	4200	1200	7940	1171	117.066	11563	117.066	117.066
3615	18.721	687.44	w/o MS2:7-benzyl-11,14,20-trimethyl-16-(2-methylpropyl)-10,13-di(propan-2-yl)-17-oxa-1,5,8,11,14-pentazabicyclo[17.3.0]docosane-2,6,9,12,15,18-hexone	[M+H]+	183180	59970	115256	143782	72415	56091	131628	51993	72627	46839	101116	41618
3618	1.674	689.214	w/o MS2:[(1R,2R,3aR,5R,6E,10R,11S,13R,13aS)-1,2,3a,10,11-pentaacetyloxy-2,5,8,8-tetramethyl-12-methylidene-4,9-dioxo-3,5,10,11,13,13a-hexahydro-1H-cyclopenta[12]annulen-13-yl] acetate	[M+H]+	4549.21	4549.21	47264	4549.21	4549.21	4549.21	87196	4549.21	4549.21	45492	4549.21	4549.21
3624	17.56	693.455	w/o MS2:(4aR,5R,6aS,6bR,10S,12aR)-10-[(2R,3R,4R,5S,6R)-3-acetamido-4,5-dihydroxy-6-(hydroxymethyl)oxan-2-yl]oxy-5-hydroxy-2,2,6a,6b,9,9,12a-heptamethyl-1,3,4,5,6,6a,7,8,8a,10,11,12,13,14b-tetradecahydropicene-4a-carboxylic acid	[M+H]+	277906	134138	144466	1294	111528	194764	115489	338896	258108	141317	131719	116805
3641	7.489	699.356	w/o MS2:3-[(3S,5S,8R,10S,13R,14S,17R)-3-[4,5-dihydroxy-6-(hydroxymethyl)-3-[3,4,5-trihydroxy-6-(hydroxymethyl)oxan-2-yl]oxyoxan-2-yl]oxy-14-hydroxy-10,13-dimethyl-1,2,3,4,5,6,7,8,9,11,12,15,16,17-tetradecahydrocyclopenta[a]phenanthren-17-yl]-2H-furan-5-one	[M+Na]+	1153638	2335189	1428393	5313138	499639	1222635	1529165	2102377	502614	1504527	1291988	1915120
3655	0.78	705.186	w/o MS2:[4,5-diacetyloxy-6-[7-hydroxy-5-methoxy-4-oxo-2-[4-[3,4,5-trihydroxy-6-(hydroxymethyl)oxan-2-yl]oxyphenyl]chromen-6-yl]oxan-3-yl] acetate	[M+H]+	118645	411297	435560	289216	344523	393950	340389	350340	74237	457821	25806	257445
3657	18.108	705.409	w/o MS2:[(2S,3R,4S,5S,6R)-3,4,5-trihydroxy-6-(hydroxymethyl)oxan-2-yl] (1S,4aR,6aS,6bR,8R,9R,10R,11R,12aR)-1,8,10,11-tetrahydroxy-9-(hydroxymethyl)-2,2,6a,6b,9,12a-hexamethyl-1,3,4,5,6,6a,7,8,8a,10,11,12,13,14b-tetradecahydropicene-4a-carboxylate	[M+H]+	40057	16315	885.178	15766	15612	12978	885.178	23089	13500	885.178	13532	8852
3663	10.971	707.397	w/o MS2:3,4,5-trihydroxy-6-(hydroxymethyl)oxan-2-yl 4,6-dihydroxy-7,12,16-trimethyl-15-(4,5,6-trihydroxy-6-methylheptan-2-yl)pentacyclo[9.7.0.0?,?.0?,?.0??,??]octadecane-7-carboxylate	[M+H]+	51240	73031	2968.06	35477	29681	47222	2968.06	75797	80705	2968.06	72213	72177
3665	23.308	708.511	w/o MS2:7-benzyl-11,14,20-trimethyl-16-(2-methylpropyl)-10,13-di(propan-2-yl)-17-oxa-1,5,8,11,14-pentazabicyclo[17.3.0]docosane-2,6,9,12,15,18-hexone	[M+H]+	1268328	1928687	1333781	1885554	1989310	1715696	1095999	2039131	1691849	1434790	1403548	1796113
3667	18.283	710.347	w/o MS2:[(1R,2R,3aR,5R,6E,10R,11S,13R,13aS)-1,2,3a,11,13-pentaacetyloxy-2,5,8,8-tetramethyl-12-methylidene-4,9-dioxo-3,5,10,11,13,13a-hexahydro-1H-cyclopenta[12]annulen-10-yl] 2-methylbutanoate	[M+H]+	1178.84	11788	1178.84	1178.84	1178.84	1178.84	1178.84	18668	1178.84	1178.84	1178.84	12904
3684	6.993	715.33	w/o MS2:5-[(3S,8R,10R,13R,14S,17R)-3-[(2R,3R,4R,5S,6R)-3,4-dihydroxy-6-(hydroxymethyl)-5-[(2S,3R,4R,5R,6S)-3,4,5-trihydroxy-6-methyloxan-2-yl]oxyoxan-2-yl]oxy-14-hydroxy-10,13-dimethyl-1,2,3,6,7,8,9,11,12,15,16,17-dodecahydrocyclopenta[a]phenanthren-17-yl]pyran-2-one	[M+H]+	5932.32	5932.32	104747	5932.32	5932.32	5932.32	103530	5932.32	5932.32	59323	5932.32	5932.32
3687	19.146	715.385	w/o MS2:[(2R,3R,4S,5S,6R)-3-acetyloxy-2-(acetyloxymethyl)-5-hexanoyloxy-6-[(2S,3R)-2,3,4-trihydroxybutoxy]oxan-4-yl] 14-hydroxytetradecanoate	[M+H]+	63721	27239	1726.51	17265	44577	37041	1726.51	66110	92121	1726.51	78681	48260
3697	14.941	719.489	w/o MS2:CUDA	[M+H]+	38090	23856	10331	17248	6034	14984	8743	5783	20172	11459	11798	8816
3701	17.923	721.394	w/o MS2:[2-[4-hydroxy-2,5-bis(hydroxymethyl)-3-(3-methylbutanoyloxy)oxolan-2-yl]oxy-6-(hydroxymethyl)-4,5-bis(2-methylpropanoyloxy)oxan-3-yl] decanoate	[M+H]+	854.538	24703	854.538	854.538	854.538	854.538	854.538	17431	854.538	854.538	854.538	8545
3763	1.046	743.159	w/o MS2:[4,5-diacetyloxy-6-[7-hydroxy-5-methoxy-4-oxo-2-[4-[3,4,5-trihydroxy-6-(hydroxymethyl)oxan-2-yl]oxyphenyl]chromen-6-yl]oxan-3-yl] acetate	[M+H]+	470.653	22174	470.653	4707	470.653	470.653	470.653	15560	470.653	470.653	470.653	13336
3768	18.737	743.381	w/o MS2:[2-[4-hydroxy-2,5-bis(hydroxymethyl)-3-(3-methylbutanoyloxy)oxolan-2-yl]oxy-6-(hydroxymethyl)-4,5-bis(2-methylpropanoyloxy)oxan-3-yl] decanoate	[M+H]+	56166	173258	4194.91	67057	44718	48165	4194.91	215934	41949	4194.91	67520	198146
3780	3.13	749.208	w/o MS2:[4-[(2S,3R,4S,5S,6R)-3,4,5-trihydroxy-6-(hydroxymethyl)oxan-2-yl]oxyphenyl]methyl 2-[(E)-3-(4-hydroxyphenyl)prop-2-enoyl]oxy-3-methyl-3-[(2S,3R,4S,5S,6R)-3,4,5-trihydroxy-6-(hydroxymethyl)oxan-2-yl]oxybutanoate	[2M+H]+	44724	47036	116.142	1161	33347	28381	116.142	48662	65014	116.142	61659	61940
3781	17.193	749.391	w/o MS2:[17-(2,6-dihydroxy-6-methyl-3-oxoheptan-2-yl)-3-hydroxy-4,4,9,13,14-pentamethyl-2-[3,4,5-trihydroxy-6-(hydroxymethyl)oxan-2-yl]oxy-2,3,7,8,10,11,12,15,16,17-decahydro-1H-cyclopenta[a]phenanthren-16-yl] acetate	[M+H]+	1454.97	14550	1454.97	1454.97	1454.97	1454.97	1454.97	28326	1454.97	1454.97	1454.97	21808
3795	17.469	755.382	w/o MS2:[(1R,3R,10S,13R,14S,17R)-3-[(2R)-5-(3,5-dihydroxy-4-methoxy-6-methyloxan-2-yl)oxy-3,4-dihydroxy-6-(hydroxymethyl)oxan-2-yl]oxy-14-hydroxy-10,13-dimethyl-17-(5-oxo-2H-furan-3-yl)-1,2,3,4,5,6,7,8,9,11,12,15,16,17-tetradecahydrocyclopenta[a]phenanthren-1-yl] acetate	[M+H]+	899.802	8998	899.802	899.802	899.802	899.802	899.802	20679	899.802	899.802	899.802	14449
3813	16.972	759.374	w/o MS2:[2-[4-hydroxy-2,5-bis(hydroxymethyl)-3-(3-methylbutanoyloxy)oxolan-2-yl]oxy-6-(hydroxymethyl)-4,5-bis(2-methylpropanoyloxy)oxan-3-yl] decanoate	[M+H]+	695654	931418	130860	332121	341141	609114	144002	1120151	422860	118066	426530	1018930
3825	20.232	767.506	w/o MS2:(2S,3R,4R,5R,6S)-2-{[(2R,3R,4S,5S,6R)-2-{[(2R,5S,7R,8S,10R,11R,14S,15R,16R)-5,16-dihydroxy-2,6,6,10,11-pentamethyl-14-(6-methylhepta-2,5-dien-2-yl)tetracyclo[8.7.0.0?,?.0??,??]heptadecan-8-yl]oxy}-4,5-dihydroxy-6-(hydroxymethyl)oxan-3-yl]oxy}-6-methyloxane-3,4,5-triol	[M+H]+	1786.09	1786.09	28445	1786.09	1786.09	1786.09	17861	1786.09	1786.09	20304	1786.09	1786.09
3829	18.29	769.485	w/o MS2:2-[5-[2-[2-[5-[2-[2-[5-[2-[2-[5-(2-hydroxybutyl)oxolan-2-yl]propanoyloxy]propyl]oxolan-2-yl]propanoyloxy]propyl]oxolan-2-yl]propanoyloxy]propyl]oxolan-2-yl]propanoic acid	[M+H]+	33639	1353.33	1353.33	1353.33	1353.33	1353.33	1353.33	1353.33	13533	1353.33	15559	1353.33
3837	11	771.502	w/o MS2:(2S,3R,4S,5R)-2-[(2R,3R,4S,5S,6R)-2-[[(3S,6S,8R,10R,12R,13R,14R,17S)-3,12-dihydroxy-17-[(2S)-2-hydroxy-6-methylhept-5-en-2-yl]-4,4,8,10,14-pentamethyl-2,3,5,6,7,9,11,12,13,15,16,17-dodecahydro-1H-cyclopenta[a]phenanthren-6-yl]oxy]-4,5-dihydroxy-6-(hydroxymethyl)oxan-3-yl]oxyoxane-3,4,5-triol	[M+H]+	53390	37278	1104.96	13480	11050	17889	1104.96	42828	31999	1104.96	26752	13319
3886	18.04	789.42	w/o MS2:2-[1-[1-hydroxy-10,13-dimethyl-3-[3,4,5-trihydroxy-6-[[3,4,5-trihydroxy-6-(hydroxymethyl)oxan-2-yl]oxymethyl]oxan-2-yl]oxy-2,3,4,7,8,9,11,12,14,15,16,17-dodecahydro-1H-cyclopenta[a]phenanthren-17-yl]ethyl]-4,5-dimethyl-2,3-dihydropyran-6-one	[M+H]+	1657.65	16577	1657.65	1657.65	1657.65	1657.65	1657.65	29629	1657.65	1657.65	1657.65	24360
3902	0.898	797.086	w/o MS2:3-[(2S,3R,4S,5R,6R)-4-[(2S,3R,4S,5S,6R)-4,5-dihydroxy-6-(hydroxymethyl)-3-[(2S,3R,4S,5R)-3,4,5-trihydroxyoxan-2-yl]oxyoxan-2-yl]oxy-3,5-dihydroxy-6-(hydroxymethyl)oxan-2-yl]oxy-2-(3,4-dihydroxyphenyl)-5,7-dihydroxychromen-4-one	[2M+H]+	126.746	16020	4137	6114	15278	2898	1267	17974	126.746	126.746	126.746	8209
3921	17.693	803.4	w/o MS2:DIGITOXIN	[M+Na]+	7285	53513	139.325	2764	1393	139.325	139.325	34967	10759	139.325	12201	53882
3978	1.644	839.308	w/o MS2:Utilin	[M+H]+	282.599	282.599	136041	2826	65586	57458	152751	282.599	282.599	45284	282.599	282.599
3985	7.705	847.443	w/o MS2:(3?,8?,9?,24E)-3-[(6-O-Acetyl-4-O-pentopyranosylhexopyranosyl)oxy]-12,16-dihydroxy-9,19-cyclolanost-24-en-26-oic acid	[M+H]+	10944	20332	15665	7977	11788	17786	16367	18963	6013	408.491	4085	11870
4008	0.774	867.238	w/o MS2:(3S,4R)-7-hydroxy-3-[(3S,4R)-7-hydroxy-4-(4-hydroxyphenyl)-2-oxo-5-[(2S,3R,4S,5S,6R)-3,4,5-trihydroxy-6-(hydroxymethyl)oxan-2-yl]oxy-3,4-dihydrochromen-3-yl]-4-(4-hydroxyphenyl)-5-[(2S,3R,4S,5S,6R)-3,4,5-trihydroxy-6-(hydroxymethyl)oxan-2-yl]oxy-3,4-dihydrochromen-2-one	[M+H]+	562.583	32735	125334	32676	32454	5626	88876	43256	562.583	168847	562.583	17037
4025	10.904	881.485	w/o MS2:N-[3-[5,17-bis[3-[acetyl(hydroxy)amino]propyl]-14-benzyl-8-(hydroxymethyl)-11-(2-methylpropyl)-3,6,9,12,15,18-hexaoxo-1,4,7,10,13,16-hexazacyclooctadec-2-yl]propyl]-N-hydroxyacetamide	[M+H]+	13076	33592	1307.57	34842	23146	41622	1307.57	58053	28752	1307.57	35207	22709
4050	18.136	887.495	w/o MS2:(3?,5?,9?,14?,25S)-Spirostan-3-yl 6-deoxy-?-L-mannopyranosyl-(1->4)-[?-D-glucopyranosyl-(1->2)]-?-D-glucopyranoside	[M+H]+	244878	293117	99177	237101	242701	7062	90641	319697	248291	83590	253735	290866
4111	21.276	927.527	w/o MS2:(2S,3S,4S,5R,6R)-6-[[(3S,6aR,6bS,8aR,14bR)-9-hydroxy-4,4,6a,6b,8a,11,11,14b-octamethyl-1,2,3,4a,5,6,7,8,9,10,12,12a,14,14a-tetradecahydropicen-3-yl]oxy]-5-[4,5-dihydroxy-6-(hydroxymethyl)-3-[(2S,3R,4R,5R,6S)-3,4,5-trihydroxy-6-methyloxan-2-yl]oxyoxan-2-yl]oxy-3,4-dihydroxyoxane-2-carboxylic acid	[M+H]+	8384	12753	208283	48253	113293	118568	105669	132329	50063	284740	44132	41978
4138	19.769	941.504	w/o MS2:(2S,3S,4S,5R,6R)-6-[[(3S,6aR,6bS,8aR,9R,12aS,14bR)-9-hydroxy-4,4,6a,6b,8a,11,11,14b-octamethyl-1,2,3,4a,5,6,7,8,9,10,12,12a,14,14a-tetradecahydropicen-3-yl]oxy]-5-[(2R,3R,4S,5R,6S)-6-carboxy-4,5-dihydroxy-3-[(2S,3R,4R,5R,6S)-3,4,5-trihydroxy-6-methyloxan-2-yl]oxyoxan-2-yl]oxy-3,4-dihydroxyoxane-2-carboxylic acid	[M+H]+	119.047	119.047	29336	119.047	1190	119.047	38510	119.047	119.047	42302	119.047	119.047
4191	17.439	969.554	w/o MS2:(2R,3S,4S,5R,6R)-2-(hydroxymethyl)-6-[[(2R,3S,4S,5R,6S)-3,4,5-trihydroxy-6-[(2S)-2-[(3S,8R,10R,12R,14R,17S)-12-hydroxy-4,4,8,10,14-pentamethyl-3-[(2R,3R,4S,5S,6R)-3,4,5-trihydroxy-6-(hydroxymethyl)oxan-2-yl]oxy-2,3,5,6,7,9,11,12,13,15,16,17-dodecahydro-1H-cyclopenta[a]phenanthren-17-yl]-6-methylhept-5-en-2-yl]oxyoxan-2-yl]methoxy]oxane-3,4,5-triol	[M+H]+	26261	9641	263.253	48195	35919	2633	263.253	5524	27834	263.253	37716	8245
4206	19.023	979.599	w/o MS2:18-b-Glycyrrhetinic acid	[M+H]+	377.673	377.673	377.673	9496	11113	3777	377.673	32098	12260	377.673	19973	12481
4212	9.021	985.495	w/o MS2:2-[[6-[1-[3-[5-(3,5-dihydroxy-4-methoxy-6-methyloxan-2-yl)oxy-4-methoxy-6-methyloxan-2-yl]oxy-14-hydroxy-10,13-dimethyl-1,2,3,4,7,8,9,11,12,15,16,17-dodecahydrocyclopenta[a]phenanthren-17-yl]ethoxy]-3,4,5-trihydroxyoxan-2-yl]methoxy]-6-(hydroxymethyl)oxane-3,4,5-triol	[M+H]+	18434	17272	22381	24862	29173	19707	28198	11136	27460	14542	10586	8091
4239	18.398	1045.57	w/o MS2:[5-hydroxy-6-[6-[[14-hydroxy-10,13-dimethyl-17-[1-[3,4,5-trihydroxy-6-[[3,4,5-trihydroxy-6-(hydroxymethyl)oxan-2-yl]oxymethyl]oxan-2-yl]oxyethyl]-1,2,3,4,7,8,9,11,12,15,16,17-dodecahydrocyclopenta[a]phenanthren-3-yl]oxy]-4-methoxy-2-methyloxan-3-yl]oxy-4-methoxy-2-methyloxan-3-yl] (E)-2-methylbut-2-enoate	[M+H]+	115.261	115.261	115.261	12544	17345	11505	115.261	28522	30074	1153	9627	7321

## Sheet: Supplementary Table S2
Table S2. Top 6 discriminant metabolites reliably annotated in commercial materials of Mentha spicata L.
VIP order	ID	Annotation	RT	m/z	Adduct	Molecular formula	MS/MS	Delta ppm
2.3251	197	7-Methylene-1,3,5-cyclooctatriene	5.835	119.084	[M+H]+	C9H12	104	-13.9396
2.2643	2995	Antheraxanthin	18.619	585.451	[M+H]+	C40H56O3	191, 269, 464, 585	34.7778
2.2295	1676	Salvigenin	18.609	329.113	[M+H]+	C18H16O6	104	32.5127
2.1609	1965	Rosmarinic acid	6.296	361.091	[M+H]+	C18H16O8	163	-2.2155
2.1189	778	Esculetin	19.208	179.106	[M+H]+	C9H6O4	163, 176	31.0441
2.0258	1933	Chlorogenic acid	18.078	355.091	[M+H]+	C16H18O9	133, 145	-32.6948

## Sheet: Supplementary Table S3
Correlation table
	Esculetin	Rosmarinic_acid	7-Methylene-1,3,5-cyclooctatriene	Chlorogenic_acid	Salvigenin	Antheraxanthin
Esculetin	1	-0.89539	-0.93765	-0.94008	-0.98253	-0.97651
Rosmarinic_acid_1	-0.89539	1	0.94191	0.94836	0.9162	0.90586
7-Methylene-1,3,5-	-0.93765	0.94191	1	0.99127	0.97508	0.98155
Chlorogenic_acid	-0.94008	0.94836	0.99127	1	0.98193	0.9677
Salvigenin	-0.98253	0.9162	0.97508	0.98193	1	0.98446
Antheraxanthin_1	-0.97651	0.90586	0.98155	0.9677	0.98446	1
p-value of correlation table
	Esculetin	Rosmarinic_acid	7-Methylene-1,3,5-cyclooctatriene	Chlorogenic_acid	Salvigenin	Antheraxanthin
Esculetin	NA	0.0010991	0.00018746	0.00016351	2.28e-06	6.3879e-06
Rosmarinic_acid_1	0.0010991	NA	0.00014695	9.7918e-05	0.00051641	0.00076799
7-Methylene-1,3,5-	0.00018746	0.00014695	NA	2.0283e-07	7.846e-06	2.7574e-06
Chlorogenic_acid	0.00016351	9.7918e-05	2.0283e-07	NA	2.5642e-06	1.9321e-05
Salvigenin	2.28e-06	0.00051641	7.846e-06	2.5642e-06	NA	1.5182e-06
Antheraxanthin_1	6.3879e-06	0.00076799	2.7574e-06	1.9321e-05	1.5182e-06	NA
